34

35

36 **ABSTRACT**

37 Mapping the detailed cell-type-specific input networks and neuronal projectomes are  
38 essential to understand brain function in normal and pathological states. However,  
39 several properties of current tracing systems, including labeling sensitivity, trans-  
40 synaptic efficiencies, reproducibility among different individuals and different Cre-  
41 driver animals, still remained unsatisfactory. Here, we developed MAP-  
42 ENVIVIDERS, a recombinase system-dependent vector mixing-based strategy for  
43 highly efficient neurocircuit tracing. MAP-ENVIVIDERS enhanced tracing efficiency  
44 of input networks across the whole brain, with over 10-fold improvement in diverse  
45 previously poor-labeled input brain regions and particularly, up to 70-fold  
46 enhancement in brainstem compared with the current standard rabies-virus-mediated  
47 systems. MAP-ENVIVIDERS was over 10-fold more sensitive for cell-type-specific  
48 labeling than previous strategies, enabling us to capture individual cell-type-specific  
49 neurons with extremely complex axonal branches and presynaptic axonal boutons,  
50 both about one order of magnitude than previously reported and considered. MAP-  
51 ENVIVIDERS provides powerful tools for deconstructing novel input/output circuitry  
52 towards functional studies and disorders-related mechanisms.

53

## 54 INTRODUCTION

55 Efficient mapping the input-output circuits of specific cell types is a central goal in  
56 neuroscience. Comprehensive tracing presynaptic partners to specific cell types is  
57 essential to understand how the input resources and strength received from other brain  
58 regions and other type of neurons guided the corresponding behaviors. For cell-type-  
59 specific input mapping, currently, rabies virus (RV, SAD B19 strain)-mediated  
60 monosynaptic tracing systems with the involvement of two or more recombinant  
61 adeno-associated viruses (rAAVs) helpers have been widely used for tracing the  
62 direct input network of a given type of neuron<sup>1-6</sup>. However, problems such as  
63 underestimated total input numbers, inefficient trans-synaptic abilities, particularly  
64 leading to rare labeling in brain regions which were far away from injection site or  
65 with weaker input strength, still hindered our further comprehensive characterization  
66 of neural circuits<sup>7-9</sup>. To solve this problem, extensive attention has been made via  
67 modifying the genome, including engineering of promoters for enhanced regulation  
68 strength or improvement of monosynaptic tracing efficiency with optimized  
69 glycoprotein (oG) to improve the efficiency of rabies glycoprotein (RG)-expressing  
70 helper rAAVs used in current RV-mediated monosynaptic tracing systems<sup>5,10</sup>. Though  
71 great achievements have been made with these modifications, strategies to achieve  
72 comprehensive improvement of tracing efficiencies across the whole brain,  
73 particularly in previously poor-labeled brain regions were still in urgent need.

74 On the other hand, obtaining detailed single-neuron projectomes at the whole  
75 brain level enhances our understanding of input-output relationship of neural circuits  
76 and facilitates identification of novel cell types<sup>11</sup>. Though great achievements have  
77 been made in full morphology reconstruction of individual neurons belonging to  
78 different cell types<sup>11-14</sup>, fewer studies have focused on synaptic levels which still  
79 remained a great challenge due to the requirement of extremely higher labeling  
80 brightness (generally 3-fold higher) to distinguish the tiny-sized boutons (1-2  $\mu\text{m}$  in  
81 diameter) from their resided thinner axons<sup>15,16</sup>. Remarkably, understanding detailed  
82 axonal projection patterns on synaptic levels facilitate the elucidation of how  
83 information flows across diverse brain regions, to what extent individual neurons  
84 exert effects on their postsynaptic targets and how synaptic plasticity affects function  
85 of individual neurons under the normal and pathological conditions<sup>17,18</sup>. To achieve  
86 neuronal sparse labeling with cell-type specificity, current strategy utilized

87 combinatorial genetic (e.g. Cre-driver animals) and viral method (e.g. rAAVs) based  
88 on intersectional gene expressions<sup>19</sup>. In these strategies, cell-type specificity was  
89 controlled by Cre-driver animals, labeling sparseness and brightness were mainly  
90 controlled by the mixtures of two or more rAAVs expressing essential elements for  
91 recombination (e.g. Cre/lox-Flp/FRT or Cre/lox-tTA/TRE combinations) along with  
92 the strength of Cre recombinase<sup>13,20,21</sup>. However, due to inhomogeneous strength of  
93 Cre recombinase, these labeling systems suffered from varied labeling brightness  
94 among different transgenic lines and rather low gene expression levels particularly in  
95 transgenic lines with weaker strength of Cre recombinase<sup>21-23</sup>. Thus, to generate  
96 detailed single-neuron projectomes of diverse cell types on synaptic levels, the  
97 optimal cell-type-specific labeling strategies should be with adjustable sparseness  
98 along with achievement of superb-bright labeling in diverse Cre-driver transgenic  
99 lines.

100 Overall, almost all current neural circuit labeling strategy involving multiple  
101 rAAV vectors focused on modifying viral genomes to improve vector properties of  
102 each separately packaged rAAV. However, when used together via co-injections or  
103 co-administrations, the labeling efficiencies or brightness of these multiple rAAV  
104 vectors still remained unsatisfactory. The probable reason was that such individual,  
105 separate improvements failed to consider interactions among different rAAVs. In fact,  
106 previous studies indicated that mutual suppression is prevalent among different types  
107 of viruses, e.g., AAV over herpes simplex virus<sup>24</sup>, AAV over adenovirus<sup>25</sup>, or even  
108 among the same types of viruses (e.g., herpes simplex virus and pseudorabies virus)<sup>26-</sup>  
109 <sup>28</sup>. Taken these facts, we reasoned that mutual suppression between different rAAVs,  
110 though have not been previously reported (to the best of our knowledge), will also  
111 significantly affect the gene expression levels. We further reasoned that altering viral  
112 packaging strategy, i.e., replacing the package of each viral vector independently by  
113 mixing multiple vectors in a single step on cellular level (i.e., copackaging  
114 strategy)<sup>29,30</sup> would enhance multi-gene expression efficiencies in neural circuit  
115 studies.

116 Based on this hypothesis, we developed MAP-ENVIVIDERS (**m**ultifaceted  
117 **a**melioration **p**rocess to **e**nhance **n**eurocircuit **v**isualization by **v**iral vectors **d**epending  
118 on **r**ecombinase systems), a recombinase system-dependent viral copackaging-based  
119 strategy for highly efficient neural circuit tracing. With MAP-ENVIVIDERS, we



120 achieved: (i) 10- to 70-fold increased tracing efficiencies in 40% of all input brain  
121 regions for trans-monosynaptic retrograde tracing with RV-mediated systems; (ii)  
122 More than an order of magnitude of labeling brightness for cell-type-specific labeling  
123 than previous strategies and unbiased, super-bright labeling among diverse transgenic  
124 mice. Combined with whole-brain imaging systems, MAP-ENVIVIDERS enables  
125 identification of novel projection patterns and capture presynaptic axonal boutons of  
126 individual cell-type-specific neurons with extreme complexity. Finally, we  
127 demonstrated that viral copackaging strategy significantly ameliorated mutual  
128 suppression among different rAAVs and enhanced compatibility of multi-gene  
129 expressions in the same cells, the probable reasons leading to the high sensitivity and  
130 efficiency of MAP-ENVIVIDERS.

## 131 **RESULTS**

### 132 **MAP-ENVIVIDERS substantially improves the efficiency of RV-mediated** 133 **monosynaptic tracing systems**

134 The current RV-mediated trans-monosynaptic tracing systems involve two different  
135 processes: the entry of EnvA-pseudotyped, RG-deleted RV (EnvA-RV $\Delta$ G) into the  
136 cells through the interaction of EnvA with TVA receptor delivered by one rAAV, and  
137 the assembly of infectious RV by providing RV $\Delta$ G with the RG delivered by another  
138 rAAV<sup>1-6</sup>. To investigate whether MAP-ENVIVIDERS, the recombinase system-  
139 dependent viral copackaging strategy would improve the coherence between the  
140 TVA-EnvA interaction and RV $\Delta$ G-RG assembly, and thus leading to a significant  
141 increase in the efficiency of trans-monosynaptic labeling with the prevalent rAAV-RV  
142 system, we designed MAP-ENVIVIDERS with two Cre-dependent vectors, AAV-  
143 DIO-EGFP-TVA (GT) and AAV-DIO-RG (**Fig. 1a**). As an example, we copackaged  
144 AAV-DIO-GT and AAV-DIO-RG at a ratio of 1:2 to generate littermate virus, termed  
145 IAAV-DIO-GT/RG for convenience (where I refers to littermate hereafter). For  
146 comparisons, we packaged the two vectors independently and mixed them at a ratio of  
147 1:2, the mixtures were abbreviated for sAAV-DIO-GT/RG (s refers to stranger  
148 hereafter; **Fig. 1b**). Since genetically modified, EnvA-pseudotyped RV (EnvA-  
149 SAD $\Delta$ G-DsRed) used in two systems were identical, comparisons of tracing  
150 efficiencies between IAAV-DIO-GT/RG and sAAV-DIO-GT/RG represented the  
151 difference between MAP-ENVIVIDERS and prevalent rAAV-RV system.

152

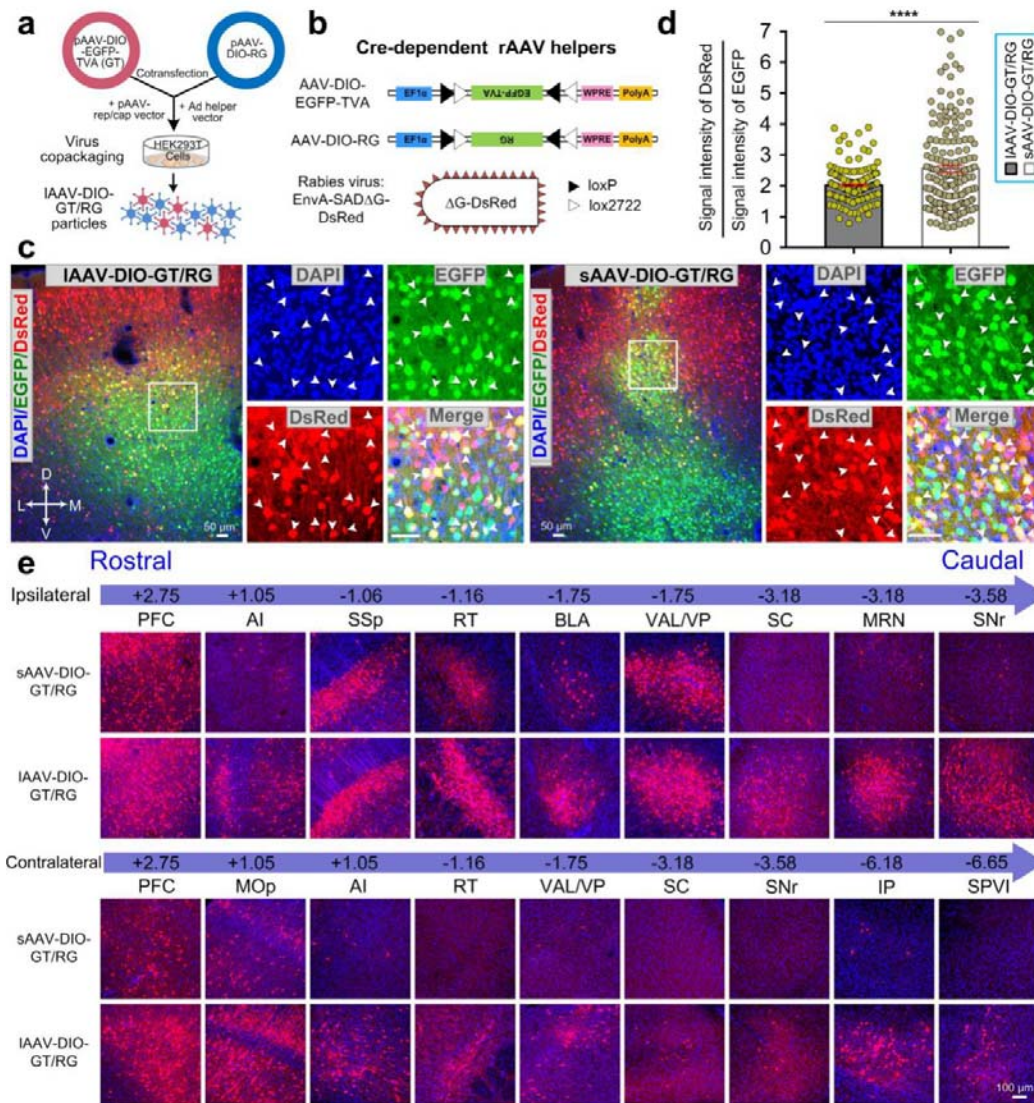

153

154

155

156

157

158

159

160

161

162

163

164

**Fig. 1 | Demonstration of MAP-ENVVDERS in tracing direct input networks in MOP.** **a**, Schematic for generating copackaged rAAV helper by MAP-ENVVDERS (IAAV-DIO-GT/RG). Briefly, two Cre-dependent AAV vectors for the respective expression of TVA and RG were premixed at a ratio of 1:2. **b**, Schematic of the two Cre-dependent rAAV helpers and the EnvA-pseudotyped rabies virus. **c**, Representative coronal sections showing the injection site in IAAV-DIO-GT/RG- and sAAV-DIO-GT/RG-labeled mice. Boxed regions showed colocalization of 4',6-diamidino-2-phenylindole (DAPI, blue), EGFP (green), and DsRed (red). White arrowheads indicated triple-positive neurons. **d**, Comparison of the ratio between the signal intensity of DsRed and EGFP in starter cells labeled by IAAV-DIO-GT/RG and sAAV-DIO-GT/RG, n = 170 neurons from 3 mice for both groups. **e**, Representative images showing ipsi- and contralateral input neurons in different brain regions labeled by EnvA-pseudotyped rabies virus via IAAV-DIO-GT/RG or sAAV-DIO-GT/RG. Data are

165 presented as mean  $\pm$  s.e.m.; two-tailed t-test, \*\*\*\*P < 0.0001. Abbreviations: see **Supplementary**  
166 **Table 2**.

167  
168 We injected equal volume of IAAV-DIO-GT/RG or sAAV-DIO-GT/RG into the  
169 primary motor cortex (MOp) of Thy1-Cre transgenic mice, followed by the injection  
170 of EnvA-pseudotyped RV 21 days later. Nine days after the second injection, the mice  
171 were sacrificed for analysis. We found that the numbers of EGFP<sup>+</sup>/DsRed<sup>+</sup> starter  
172 cells in IAAV-DIO-GT/RG and sAAV-DIO-GT/RG groups were similar ( $2,386 \pm 172$   
173 vs.  $2,039 \pm 127$ , n = 5 animals each; **Fig. 1c** and **Supplementary Table 1**) and the  
174 value of the DsRed/EGFP ratio<sup>31</sup> closely matched the preset ratio of 2:1 for the IAAV-  
175 DIO-GT/RG group but significantly deviated from 2:1 for the sAAV-DIO-GT/RG  
176 group (**Fig. 1d** and **Supplementary Fig. 1a**, left panel;  $2.01 \pm 0.04$  versus  $2.67 \pm 0.13$ ;  
177 mean  $\pm$  s.e.m., unpaired t-test, P < 0.0001, n = 3 mice). Furthermore, the distribution  
178 of ratios in individual neurons was significantly narrower for IAAV-DIO-GT/RG than  
179 sAAV-DIO-GT/RG (**Fig. 1d**). We next examined the inputs of two labeling groups  
180 qualitatively and fluorescent images showed that the improvement granted by the  
181 MAP-ENVIVIDERS system was most prominent for highly underrepresented regions  
182 far from the injection site, such as the reticular nucleus of the thalamus (RT), the  
183 superior colliculus (SC), the midbrain reticular nucleus (MRN) and the substantia  
184 nigra pars reticulata (SNr) in midbrain on the ipsilateral side and all regions on the  
185 contralateral side, especially the interposed nucleus (IP) in cerebellum and the spinal  
186 nucleus of the trigeminal nerve, subnucleus interpolaris (SPVI) in medulla.  
187 Furthermore, MAP-ENVIVIDERS also improved the labeling moderately in the brain  
188 regions that were well-labeled by the classical sAAV-DIO-GT/RG-RV combination,  
189 such as the prefrontal cortex (PFC), the primary somatosensory area (SSp), and the  
190 ventral anterior-lateral complex of the thalamus (VAL)/ventral posterior complex of  
191 the thalamus (VP) (**Fig. 1e** and **Supplementary Fig. 2,3**).

192 To compare the global tracing efficiency of the two systems quantitatively, we  
193 continued to divide the whole brain (+3.25 to -7.25 from the bregma) into 11 major  
194 regions containing 44 subregions according to the Allen Mouse Brain Atlas and  
195 registered the numbers of DsRed-labeled input cells in each subregion<sup>32,33</sup>. We  
196 summarized the sparsely labeled input brain regions in sAAV-DIO-GT/RG labeling  
197 groups across the whole brain and found that number of input neurons in most of  
198 these areas were at least one order of magnitude enhanced by MAP-ENVIVIDERS

199 (IAAV-DIO-GT/RG) (**Fig. 2a**). Such improvements covered diverse levels: (i) from  
200 hundreds to several thousands of neurons, such as visceral area (VISC) in cortical  
201 subplate (CTXsp), CP and ventral posteromedial nucleus of the thalamus (VPM); (ii)  
202 from dozens to several hundreds of neurons: such as central amygdalar nucleus (CEA)  
203 in striatum, ventral posterolateral nucleus of the thalamus (VPL), zona incerta (ZI) in  
204 hypothalamus, periaqueductal gray (PAG), pretectal region (PRT) and SNr in  
205 midbrain; (iii) from dozens to more than one thousands of neurons: such as RT, MRN  
206 and superior colliculus, motor related (SCm) in midbrain; (iv) from individuals to one  
207 hundreds of neurons, such as parabrachial nucleus (PB) and pontine reticular nucleus,  
208 caudal part (PRNc) in pons, gigantocellular reticular nucleus (GRN) and vestibular  
209 nuclei (VNC) in medulla, or to several hundreds of neurons, such as substantia nigra,  
210 compact part (SNc) in midbrain, IP and dentate nucleus (DN) in cerebellum.

211 To further obtain specific enhanced ratios in diverse major regions and  
212 subregions achieved by MAP-ENVIVIDERS, the corresponding convergent index<sup>8</sup>  
213 (the number of input cells divided by the number of starter cells) was calculated  
214 initially. Then, the ratio between convergent index of IAAV-DIO-GT/RG and  
215 convergent index of sAAV-DIO-GT/RG was plotted against the percentage of inputs  
216 (input cells in each subregion relative to the total input cells across whole brain). The  
217 relationship between the improvement and the labeling efficiency by MAP-  
218 ENVIVIDERS is clear: the poorer the labeling with the original system, the greater  
219 the improvement (**Fig. 2c**). We found that most of the originally underrepresented  
220 regions (< 1%) were enhanced by more than an order of magnitude and these regions  
221 were distributed throughout the brain, such as CP (20-fold) in striatum, RT (17-fold)  
222 in thalamus, ZI (14-fold) in hypothalamus. Brain regions with over 20-fold (20 to 60-  
223 fold) enhanced tracing efficiencies were more frequently found in midbrain, hindbrain  
224 and cerebellum, areas which were very far away from injection site, such as SNr (41-  
225 fold) and SNc (40-fold) in midbrain; reticular nucleus (gigantocellular: 46.0-fold and  
226 intermediate: 44-fold) in medulla; IP (56-fold) and DN (38-fold) in cerebellum,  
227 corresponding to the results of fluorescent images in **Fig. 1e**. Particularly, several  
228 brain regions in brain stem, including SCm, sensory related (MY-sen) and VNC in  
229 medulla, motor related (MY-mot), showed particular improvements of up to 70-fold  
230 (**Fig. 2b** and **Supplementary Fig. 4d**).

231 To examine whether brightness of input neurons could be enhanced by MAP-  
232 ENVIVIDERS, we further compared the signal intensities of the input neurons traced

233 by IAAV-DIO-GT/RG and sAAV-DIO-GT/RG in the following brain regions: SSp,  
234 supplemental somatosensory area (SSs) and RT (**Supplementary Fig. 1a**, right panel).  
235 We found that the signal intensities of the input neurons were significantly enhanced  
236 in IAAV-DIO-GT/RG labeling groups compared with sAAV-DIO-GT/RG labeling  
237 groups (**Fig. 2d** and **Supplementary Fig. 4e**; 2.27-fold for RT, 1.94-fold for SSp and  
238 2.19-fold for SSs; unpaired t-test,  $P < 0.0001$ ,  $n = 3$  mice). These data collectively  
239 showed that MAP-ENVIVIDERS significantly enhanced not only the number but also  
240 the brightness of the labeled input neurons. Taken the facts of similar number of  
241 starter cells, significantly enhanced number and fluorescent intensity of input cells  
242 suggested that many more RVs are produced by the starter cells in MAP-  
243 ENVIVIDERS.  
244



245

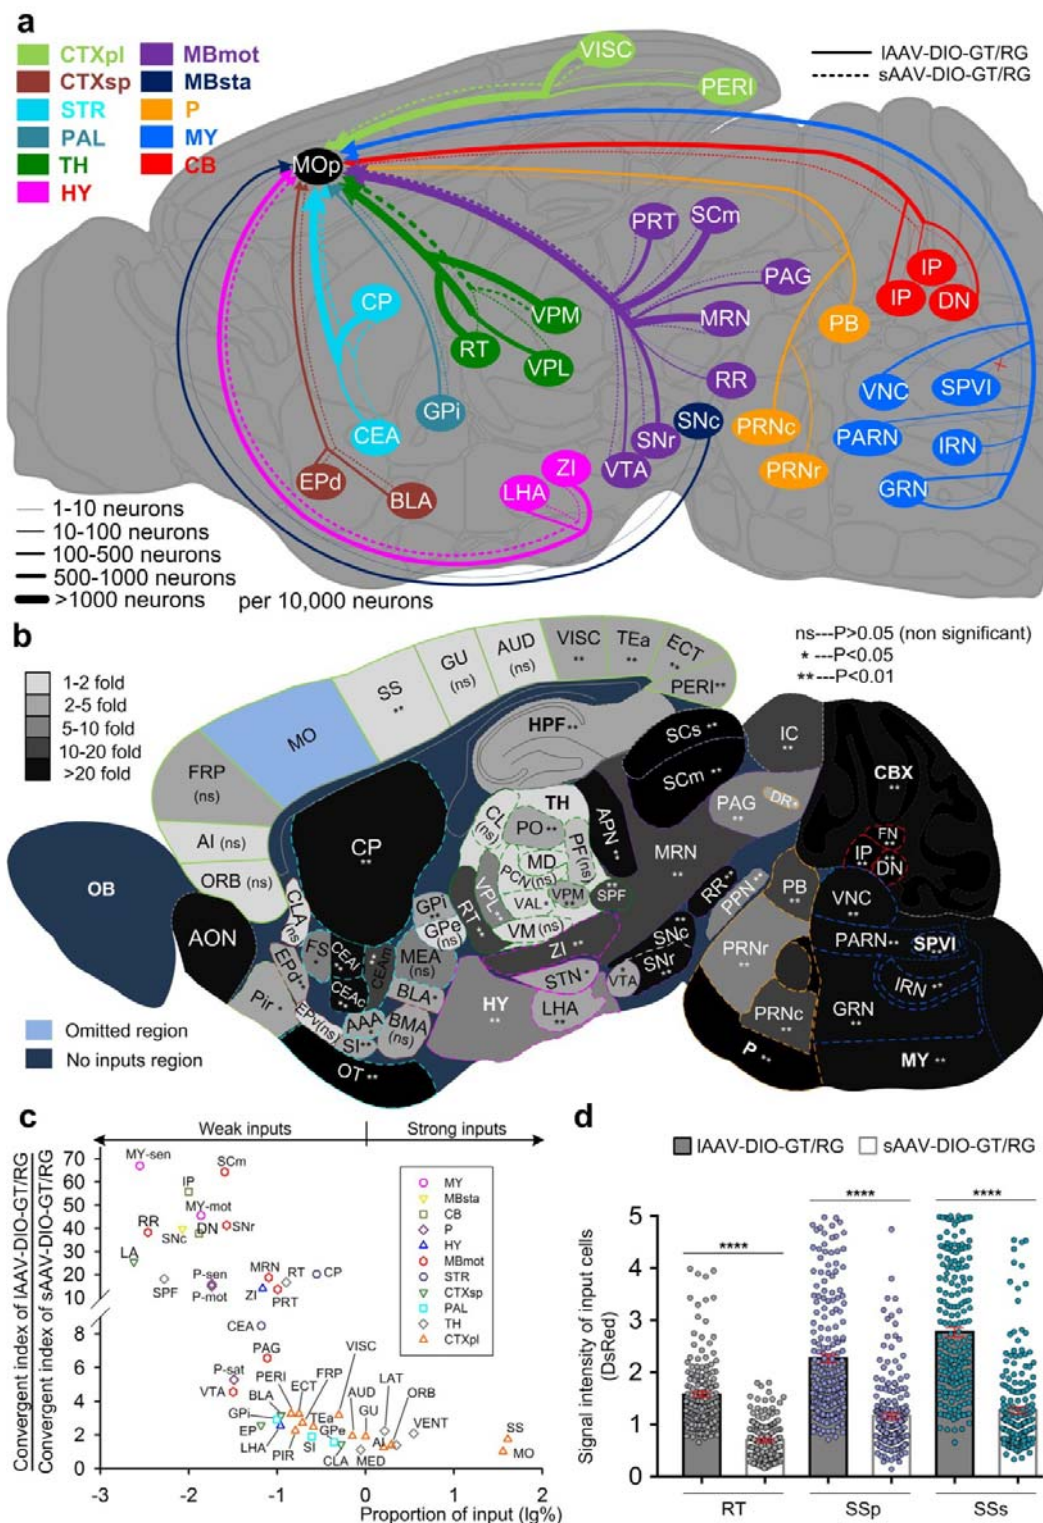

246

247

248

249

**Fig. 2 | MAP-ENVIDERS enables efficient tracing of input networks.** **a**, Summary of representative sparsely traced input subregions with current RV-mediated trans-monosynaptic tracing systems (sAAV-DIO-GT/RG, dashed lines), which were significantly enhanced by MAP-ENVIDERS (IAAV-DIO-GT/RG, solid lines). The thickness of each colored lines represented the

250 average number of input neurons ( $n = 5$  mice) in each subregions (per 10,000 neurons). **b**, Summary of  
251 increased tracing efficiency in diverse brain regions with MAP-ENVIVIDERS.  $n = 5$  mice for each  
252 group. Mann-Whitney U test. n.s., non-significant ( $P > 0.05$ ), \* $P < 0.05$ , \*\* $P < 0.01$ . **c**, Relationship  
253 between the proportion of inputs (input cells in each subregion relative to the total input cells across  
254 whole brain, which was denoted by logarithm to base 10 ( $\lg \%$ , x-axis) and the enhanced ratios  
255 provided by MAP-ENVIVIDERS (the ratio between convergent index of IAAV-DIO-GT/RG and  
256 convergent index of sAAV-DIO-GT/RG, y-axis).  $n = 5$  mice for each group. **d**, Signal intensities of  
257 input neurons in reticular nucleus of the thalamus (RT), primary somatosensory area (SSp), and  
258 supplemental somatosensory area (SSs) labeled by IAAV-DIO-GT/RG-RV or sAAV-DIO-GT/RG-RV.  
259  $n = 160$  neurons for RT,  $n = 190$  neurons for SSp and SSs,  $n = 3$  mice for each group. two-tailed t-test  
260 \*\*\*\* $P < 0.0001$ . All data are presented as mean  $\pm$  s.e.m. Abbreviations: see **Supplementary Table 2**.  
261

### 262 **Demonstration of MAP-ENVIVIDERS for reliable, density-controllable super-** 263 **bright neuronal labeling**

264 Dissection of neurocircuits on individual neuron level is critical for understanding  
265 neuronal structure-function relationship and cell-type classification<sup>11</sup>. In previous  
266 studies, dual rAAV-based Cre-lox/Flp-FRT recombinase systems and the tTA/TRE  
267 transactivation system have been successfully developed to label limited or tunable  
268 numbers of neurons of specific cell types<sup>13,20,21</sup>. However, a viral copackaging  
269 strategy has never been explored in these systems. Therefore, we next explored  
270 whether MAP-ENVIVIDERS could improve the labeling brightness for mapping  
271 projectomes of individual neurons. We first validated MAP-ENVIVIDERS in wild-  
272 type mice with copackaging a Cre-expressing vector and a Cre-dependent vector (**Fig.**  
273 **3a**). We generated three littermate rAAVs (abbreviated for IAAVs hereafter) with a  
274 CMV promoter-mediated Cre-expressing vector (AAV-CMV-Cre) and a Cre-  
275 inducible, double-floxed EYFP element (AAV-double floxed-EYFP)<sup>34</sup> at ratios of  
276 1:20,000 (IAAV<sup>20,000</sup>), 1:200,000 (IAAV<sup>200,000</sup>) and 1:1,000,000 (IAAV<sup>1,000,000</sup>). We  
277 found that these three IAAVs produced different labeling densities, but with similar  
278 brightness in the soma and long-range axonal projections when injected into MOp  
279 (**Fig. 3b** and **Supplementary Fig. 6**). The labeled somas were well separated, and the  
280 fine structures, including various types of spines<sup>35</sup> and boutons on local and long-  
281 range projecting arborizations<sup>15</sup>, could be clearly visualized and identified  
282 (**Supplementary Fig. 5**).

283 To compare the differences in labeling efficiency and brightness between IAAVs  
284 and mixtures of independently packaged rAAVs (sAAVs), we performed parallel

285 experiments with mixtures of Cre-expressing rAAV and Cre-dependent rAAVs at  
286 ratios of 1:20,000, 1:40,000, 1:80,000 and 1:1,000,000 based on previous methods<sup>12</sup>  
287 (abbreviated for sAAV<sup>20,000</sup>, sAAV<sup>40,000</sup>, sAAV<sup>80,000</sup> and sAAV<sup>1,000,000</sup>, see Methods).  
288 We selected Thy1-EYFP-H mice<sup>36</sup>, one of widely used transgenic lines as reference.  
289 Although density-controllable labeling could be achieved in both IAAVs and sAAVs-  
290 based systems, labeling by IAAVs was significantly brighter and more efficient under  
291 the same experimental conditions (**Fig. 3c** and **d**, left panel). Specifically, the  
292 brightness of sparsely labeled neurons by IAAVs (**Supplementary Fig. 1c,d**) was  
293 equivalent to Thy1-EYFP-H mice, but ~3 times stronger for IAAV<sup>200,000</sup> compared  
294 with sAAV<sup>20,000</sup> and ~7 times for IAAV<sup>1,000,000</sup> compared with sAAV<sup>1,000,000</sup>,  
295 respectively ( $P < 0.001$ ), demonstrating the sensitivity of MAP-ENVIVIDERS (**Fig.**  
296 **3d**, right panel and **Supplementary Fig. 7**). In accordance with previous study<sup>31</sup>, the  
297 Cre titers of IAAVs and sAAVs were similar as measured by quantitative polymerase  
298 chain reaction, however, the number of labeled neurons for IAAV<sup>20,000</sup> was nearly 4-  
299 fold that of sAAV<sup>20,000</sup>, demonstrating the efficiency of MAP-ENVIVIDERS (**Fig. 3c**  
300 and **Supplementary Table 3**). Similar results were also obtained in other brain  
301 regions, such as CA1 and CA3, where the labeled neurons were significantly brighter  
302 than those in the Thy1-EYFP-H mouse line (**Fig. 3e**, left and right panel;  
303 **Supplementary Fig. 8**). However, the number of neurons labeled differed among the  
304 brain regions for the same IAAV preparation (**Fig. 3e**, middle panel). These results  
305 collectively showed that the MAP-ENVIVIDERS labeling strategy is significantly  
306 more sensitive, efficient and reproducible than methods using mixtures of  
307 independently packaged rAAVs for density-controllable neuron labeling.



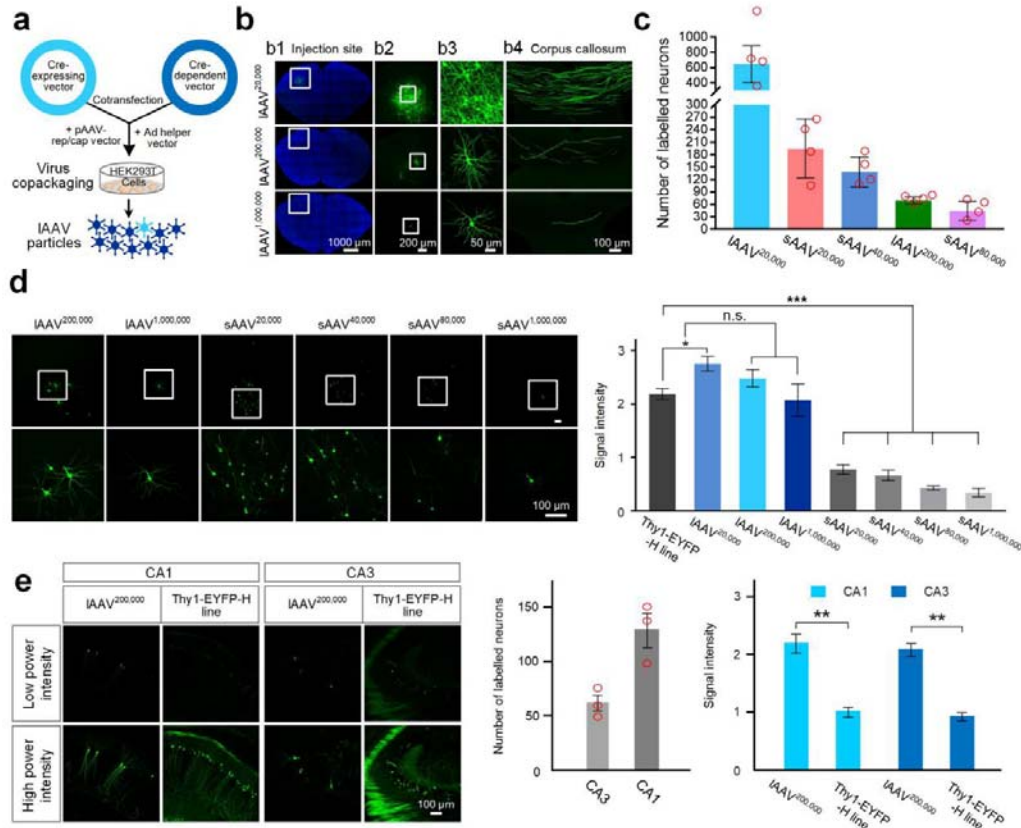

308

309

310

**Fig. 3 | MAP-ENVIVIDERS enables density-controllable, super-bright neuron labeling in wild-**

**type mice. a**, Schematic for the production of IAAVs. Briefly, a Cre-expressing vector and a Cre-

expressing vector were mixed at preset ratios on cellular level, generating IAAV particles. **b**,

Representative confocal images of neurons from mice injected with 100 nl of IAAVs produced by

copackaging pAAV-CMV-Cre and pAAV-EF1 $\alpha$ -double floxed-EYFP at the indicated ratios. Images

show neurons at the injection sites (**b1-b3**) and their long axonal projections in the corpus callosum

(**b4**). **c**, Quantification of neurons labeled by different IAAVs and sAAVs (n = 4 mice each). **d**,

Comparison of brightness between neurons labeled by different IAAVs and sAAVs. Upper panel:

confocal images; lower panel: quantifications of signal intensities of the labeled somas. Neurons from

the Thy1-EYFP-H mouse line were used as a reference (n = 40 cells for the Thy1-EYFP-H mouse line;

n = 40 cells for IAAV<sup>20,000</sup>, IAAV<sup>200,000</sup>, sAAV<sup>20,000</sup>, sAAV<sup>40,000</sup>, and sAAV<sup>80,000</sup> from 3 mice; n = 20

cells for IAAV<sup>1,000,000</sup> and n = 17 cells for sAAV<sup>1,000,000</sup>, from 4 mice). One-way ANOVA with

Dunnett's post hoc test. **e**, Applications of IAAV<sup>200,000</sup> in CA1 and CA3. Comparisons of brightness of

IAAV<sup>200,000</sup>-labeled neurons in CA1 and CA3 (n = 40 cells for each from 3 mice) with Thy1-EYFP-H

mouse line (n = 40 cells) were shown with confocal images (left panel) and measurement of signal

intensities (right panel) (n = 40 cells for each from 3 mice). Two-tailed t-test. Middle panel,

quantifications of labeled neurons in CA1 and CA3 (n = 3 mice each). All data are presented as the

mean  $\pm$  s.e.m. n.s., non-significant (P > 0.05), \*P < 0.05, \*\*P < 0.01, \*\*\*P < 0.001. Abbreviations: see

Supplementary Table 2.

Supplementary Table 2.

327

328 **MAP-ENVIVIDERS enables identification of novel type of neurons**

329 To further explore the potential of MAP-ENVIVIDERS in obtaining brain-wide long-  
330 range projections, we used fluorescence micro-optical sectioning tomography  
331 (TDI-fMOST)<sup>37</sup> to automatically image the brain sample injected with IAAV<sup>200,000</sup> in  
332 the MOp of wild-type mouse. Imaging was conducted with a voxel size of  $0.176 \times$   
333  $0.176 \times 1 \mu\text{m}^3$ , generating 12,841 continuous coronal section across the whole brain  
334 (**Fig. 4a** and **Supplementary Fig. 9**). Among the 11 reconstructed MOp pyramidal  
335 neurons, four intratelencephalic neurons located in L2, L3, and L6a projected to the  
336 ipsi- and contralateral striatum and cortex, and four pyramidal tract neurons located in  
337 L5b projected to diverse subcortical brain regions, as previously reported<sup>38-42</sup> (**Fig. 4c**;  
338 **Supplementary Fig. 10a,b** and **Supplementary Video 1**). Interestingly, the  
339 remaining three neurons (No. **s1-s3**) formed a novel type of pyramidal neuron located  
340 in L5b (**Fig. 4b** and **Supplementary Fig. 10c**). We termed these “boomerang neurons”  
341 because they send a collateral axonal branch to the contralateral MOp and dorsal  
342 caudoputamen (CP) via the corpus callosum, which then returns to the ipsilateral side  
343 via the anterior commissure, innervating the ipsilateral CP region via a collateral on  
344 the ipsilateral side, thus forming a symmetrical track (**Fig. 4d,e**; **Supplementary Fig.**  
345 **10d** and **Supplementary Video 2-4**). All of these reconstructed boomerang neurons  
346 had complex axonal projections, with over axonal 1,200 branches totaled at ~22 cm  
347 long on average (**Supplementary Fig. 14**). Therefore, the use of MAP-ENVIVIDERS  
348 together with TDI-fMOST allowed us to document the projectome of individual  
349 neurons in great detail as well as to identify novel type of neurons.

350

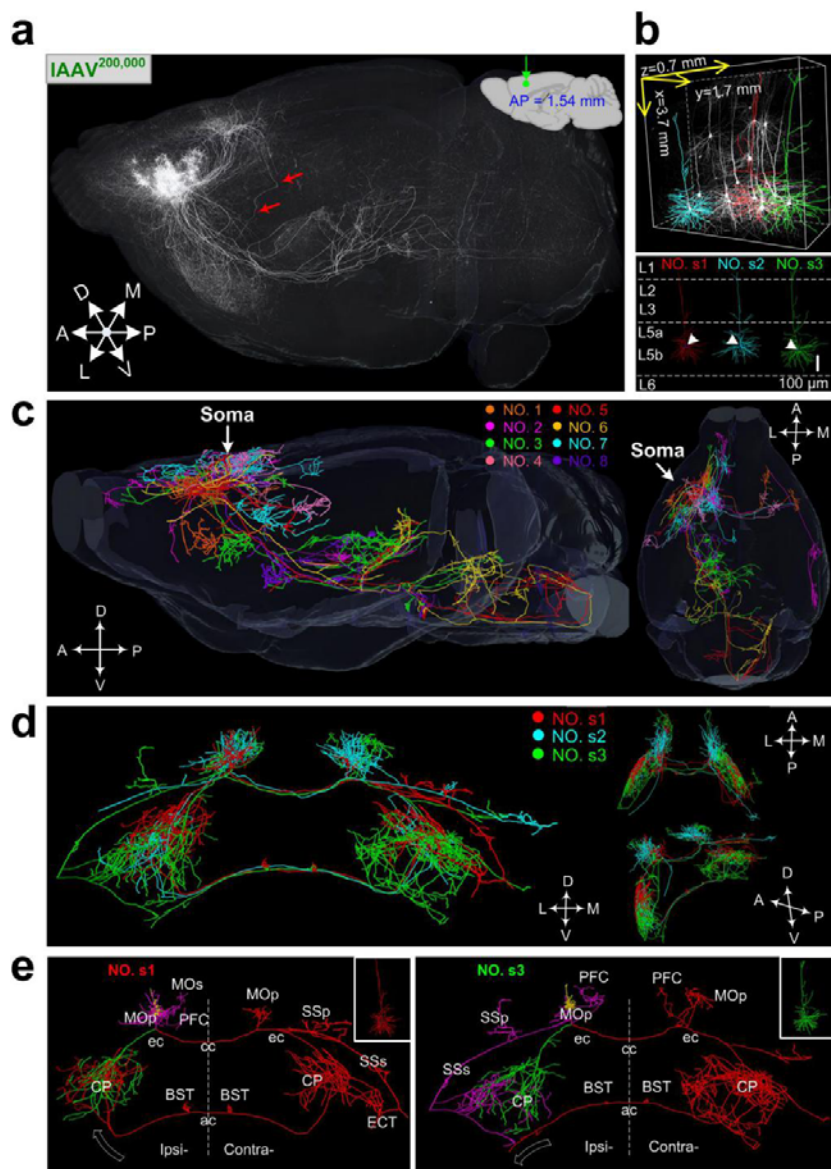

351

352

353

354

355

356

357

358

359

360

361

362

**Fig. 4 | MAP-ENVIVIDERS enables identification of a novel type of neuron in MOp.** **a**, Sagittal view showing IAAV<sup>200,000</sup>-labeled MOp whole-brain dataset. The red arrows indicate axon pathway of boomerang neurons. **b**, Raw signals (top) and reconstructed dendritic morphologies (bottom) of three boomerang neurons (No. s1-s3). **c**, Summary of axonal morphologies of the eight reconstructed pyramidal neurons (No. 1-8) in sagittal (left panel) and horizontal (right panel) views. **d**, Coronal (left), horizontal (upper right), and sagittal (with a rotated angle, lower right) views showing axonal morphologies of three boomerang neurons. **e**, Localization of the brain-wide axonal projections of neurons s1 and s3 (dendrites: yellow; local axons: magenta; the left and right branches originating from the ipsilateral external capsule are shown in green and red, respectively). Dashed white arrows indicate the termination directions of the main axons. Abbreviations: see **Supplementary Table 2**.

363 **MAP-ENVIVIDERS enables unbiased, cell-type-specific, sparse and**  
364 **super-bright labeling among diverse transgenic mice**

365 Cell-type-specific labeling is crucial for dissecting the functional role and circuitry of  
366 a given type of cell<sup>21</sup>. To demonstrate the potential of MAP-ENVIVIDERS for  
367 efficient cell-type-specific and density-controllable labeling with multiple Cre-driver  
368 lines, we next redesigned MAP-ENVIVIDERS with an Flp-expressing vector (e.g.,  
369 AAV-EF1 $\alpha$ -Flp) and an both Flp- and Cre-dependent vector (e.g., AAV-hSyn  
370 Con/Fon EYFP<sup>43</sup>) and copackaged two vectors at different ratios to generate  
371 cslAAV<sup>2,000</sup> and cslAAV<sup>20,000</sup> (cs refers to cell-type-specific hereafter, **Fig. 5a**). For  
372 validations, we injected the resulted two cslAAVs into MOp of Thy1-Cre transgenic  
373 mice and found that tunable neuron labeling was achieved with different ratios  
374 (**Supplementary Fig. 11a,b**), indicating the functionality of MAP-ENVIVIDERS  
375 with Cre-driver transgenic lines.

376 To achieve cell-type-specific sparse and super-bright labeling of cholinergic  
377 neurons, we next applied one of cslAAVs, cslAAV<sup>20,000</sup> into the basal forebrain (BF)  
378 of choline acetyltransferase (ChAT)-Cre transgenic mice<sup>23</sup> (**Fig. 5b**). Among  $54 \pm 4$   
379 well-separated neurons labeled with cslAAV<sup>20,000</sup> (n = 4 mice),  $97.6 \pm 1.6\%$  of which  
380 were ChAT positive (**Fig. 5c**, **Supplementary Fig. 12** and **Supplementary Table 3**).  
381 Fine structures of these sparsely neurons, both near and far from the somas, could be  
382 visualized clearly (**Fig. 5d-h**) and their fine long-range projections covered diverse  
383 brain regions as previously reported<sup>44</sup> (**Supplementary Fig. 13**). Parallel experiments  
384 with wild-type mice did not label any cells (n = 4 mice; **Supplementary Fig. 11c**),  
385 confirming the cell-type specificity of the method. In another set of parallel  
386 experiments in which cssAAV<sup>2,000</sup> and cssAAV<sup>20,000</sup>, mixtures of the corresponding  
387 independently packaged rAAVs (see Methods) were injected into BF of ChAT-Cre  
388 transgenic mice. We found that no neurons were labeled with cssAAV<sup>20,000</sup> and only a  
389 few faintly labeled with cssAAV<sup>2,000</sup> (n = 5 mice each; **Supplementary Fig. 11d,e**).  
390 These results demonstrated that the MAP-ENVIVIDERS strategy was significantly  
391 more sensitive and efficient for cell-type-specific neuron labeling.

392 The strength and abundance of Cre recombinase varied greatly among diverse  
393 Cre-driver transgenic lines<sup>22,23</sup>. To examine the labeling efficiencies in different Cre-  
394 driver mice, we measured the fluorescent intensity of individual neurons labeled by

395 csAAVs with different labeling densities in three Cre-driver lines under the control of  
396 different promoters, including Thy1 promoter (Thy1-Cre), dopamine  
397 transporter promoter (DAT-Cre)<sup>45</sup> and choline acetyltransferase promoter (ChAT-Cre)  
398 (**Supplementary Fig. 1c** and **Supplementary Table 3**). We found that averaged  
399 fluorescent intensity of individual neurons in showed no apparent difference among  
400 these three different types of Cre-driver transgenic mice (**Fig. 5i,j**). These results  
401 showed that the MAP-ENVIVIDERS labeling strategy enables unbiased, cell-type-  
402 specific, sparse and super-bright labeling among diverse transgenic mice.



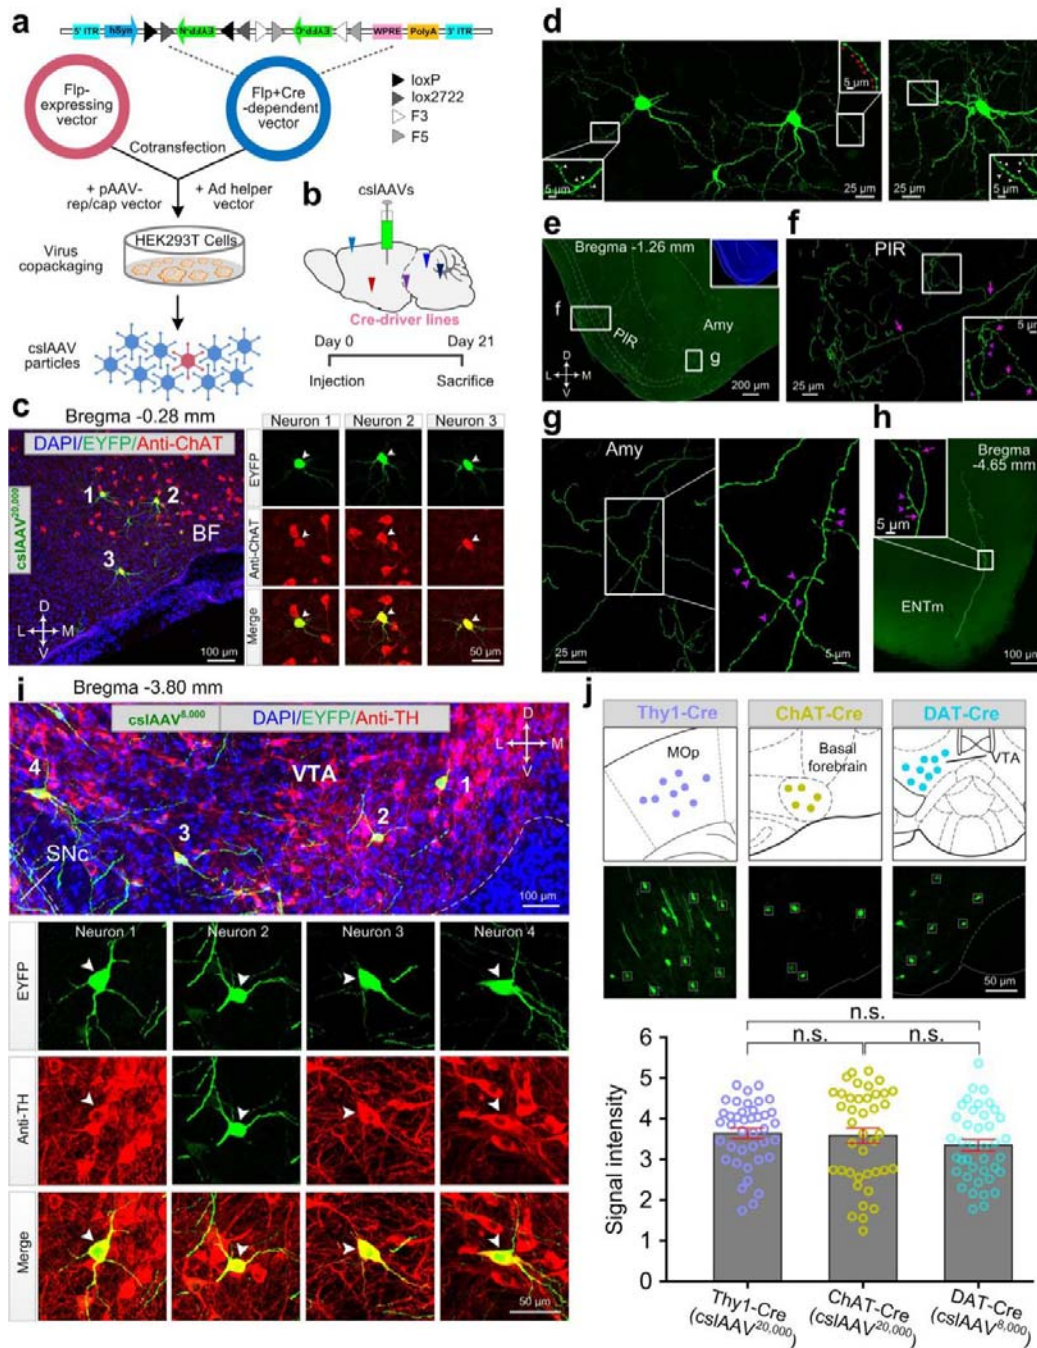

403

404

405

406

407

408

409

410

411

**Fig. 5 | MAP-ENVIVIDERS enables unbiased, cell-type-specific, sparse and super-bright labeling among diverse transgenic mice.** **a**, Schematic showing the generation of cslAAVs and the Cre- and Flp-dependent AAV vector. ITR, inverted terminal repeat; hSyn, human synapsin promoter; WPRE, woodchuck hepatitis virus post transcriptional regulatory element. **b**, Schematic of the experiment for the data in c-i. **c**, Low-magnification (left) and high-magnification (right) images showing colocalization of three cslAAV<sup>20,000</sup>-labeled basal forebrain cholinergic neurons (neurons 1 to 3, green) with anti-choline acetyltransferase (ChAT) antibody staining (red). **d**, Fine structure of three cholinergic neurons in c. Insets are enlargements of the corresponding boxes, white arrowheads

412 indicate spines, and red arrowheads indicate boutons. **e-h**, Representative images showing long-range  
413 axonal projections in the piriform area (PIR, **f**), amygdala (Amy, **g**), and entorhinal area, medial part,  
414 dorsal zone (ENTm, **h**). **i**, low-magnification (upper panel) and high-magnification (lower panel)  
415 images showing immunostaining of four cssAAV<sup>8,000</sup>-labeled dopaminergic neurons (neurons 1 to 4,  
416 green) in ventral tegmental area (VTA). Anti-tyrosine hydroxylase (TH) antibody staining, the  
417 definitive marker for dopaminergic neurons, were shown in red. **j**, upper panel, schematic for  
418 measurement (upper panel) and comparisons (lower panel) of signal intensities of individual neurons  
419 labeled by different csAAVs in multiple Cre-driver transgenic lines, including cssAAV<sup>20,000</sup>-labeled  
420 Thy1-Cre mice, cssAAV<sup>20,000</sup>-labeled ChAT-Cre mice and cssAAV<sup>8,000</sup>-labeled DAT-Cre mice. (n = 40  
421 cells from 3 mice for each). One-way ANOVA with Turkey's post hoc test. All data are presented as  
422 the mean ± s.e.m. n.s., non-significant (P > 0.05). Abbreviations: see **Supplementary Table 2**.  
423

#### 424 **MAP-ENVIVIDERS enables identifying presynapses of individual cell-type-** 425 **specific neurons.**

426 To reveal fine morphologies of individual cholinergic neurons, we also performed  
427 whole-brain mapping of BF-injected brains of ChAT-Cre mice (**Fig. 6a**). Based on  
428 cell-type-specific, sparse but super-bright labeling, four cholinergic neurons we  
429 reconstructed showed distinctive projectomes but all shared with extremely complex  
430 axonal arborizations, with an average of 4,059 axonal branches (**Fig. 6b**;  
431 **Supplementary Fig. 14** and **Supplementary Video 5**). Remarkably, we obtained an  
432 individual cholinergic neuron (No. **c2**) containing incredible ~9,500 axonal branches,  
433 which were nearly 9-times more than previously reconstructed individual cholinergic  
434 neuron by the combination of drug and transgenic mice strategy<sup>46</sup>. Particularly, this  
435 neuron contained two major axonal branches with one of them send massive  
436 arborizations dominating layer 2 to layer 4 of the ipsilateral anterolateral/lateral visual  
437 area (VISal/1, ~7,840 axonal branches), a critical region for visual processing<sup>47</sup>, and  
438 the other terminated in ipsilateral subiculum (SUB) (**Fig. 6e,f** and **Supplementary**  
439 **Video 6**). Projections of cholinergic neurons to hippocampus have long been known  
440 as a key player in the formation of learning and memory<sup>48</sup>. To this end, we  
441 reconstructed two BF cholinergic neurons (No. **c3** and No. **c4**) which send projections  
442 covering entire hippocampus (-1.0 to -3.8 mm from the bregma; **Fig. 6c**). Specifically,  
443 the former (No. **c3**) exhibited a point to point projection mode with sole projections to  
444 contralateral dorsal and ventral hippocampal region (HIP) from BF, whereas the latter  
445 (No. **c4**) projected to several cortical regions successively, including ipsilateral  
446 anterior piriform area, prefrontal cortex, motor areas and somatosensory areas and

447 finally terminated in ipsilateral hippocampus with massive massive arborizations in  
448 ventral HIP followed by less axonal branches in dorsal HIP and a single axonal  
449 branch regulating both ipsilateral and contralateral dorsal HIP (**Fig. 6b,c**). Similar to  
450 No. **c3**, the fourth neuron (No. **c4**) also exhibited a point to point projection mode  
451 with projections from BF to ipsilateral CP (BF→CP) in a fanwise manner (-1.1 to -2.1  
452 mm from the bregma; **Fig. 6d**). These results demonstrate that the MAP-  
453 ENVIVIDERS could capture morphological details of individual neurons with cell-  
454 type specificity to a great extent.

455 Plasticity of presynaptic axonal boutons served as key elements for the  
456 maintenance of neural circuit functions and loss of bouton density has been associated  
457 with several neurodegenerative disorders<sup>49,50</sup>. To assess the total number of individual  
458 cholinergic neurons, we randomly selected ten regions of interest (ROIs) from raw  
459 signal of each cholinergic neuron and counted the boutons along the axon shafts  
460 manually (lower right panel in **Fig. 6d** and **Supplementary Fig. 15**; also see  
461 methods). The averaged bouton density (defined as bouton numbers over axonal  
462 length) of four cholinergic neurons was estimated to be  $0.303 \pm 0.016$  bouton/ $\mu\text{m}$  (No.  
463 **c1**:  $0.320 \pm 0.016$  bouton/ $\mu\text{m}$ ; No. **c2**:  $0.302 \pm 0.020$  bouton/ $\mu\text{m}$ ; No. **c3**:  $0.279 \pm$   
464  $0.011$  bouton/ $\mu\text{m}$ ; No. **c4**:  $0.312 \pm 0.015$  bouton/ $\mu\text{m}$ ;  $n = 10$  ROIs for each neuron; left  
465 panel in **Fig. 6g** and **Supplementary Table 4**). Based on these results, we thus  
466 estimated that averaged total number of four cholinergic neurons was  $98,496 \pm 5,230$   
467 (No. **c1**:  $64,295 \pm 3,174$ ; No. **c2**:  $147,858 \pm 9,668$ ; No. **c3**:  $56,592 \pm 2,151$ ; No. **c4**:  
468  $125,138 \pm 5,928$ ; right panel in **Fig. 6g** and **Supplementary Table 3**), which (to the  
469 best of our knowledge) has not been reported previously. Such huge number of  
470 boutons obtained by MAP-ENVIVIDERS indicated that an individual cholinergic  
471 neuron enjoyed a wide range of modulation coverage.



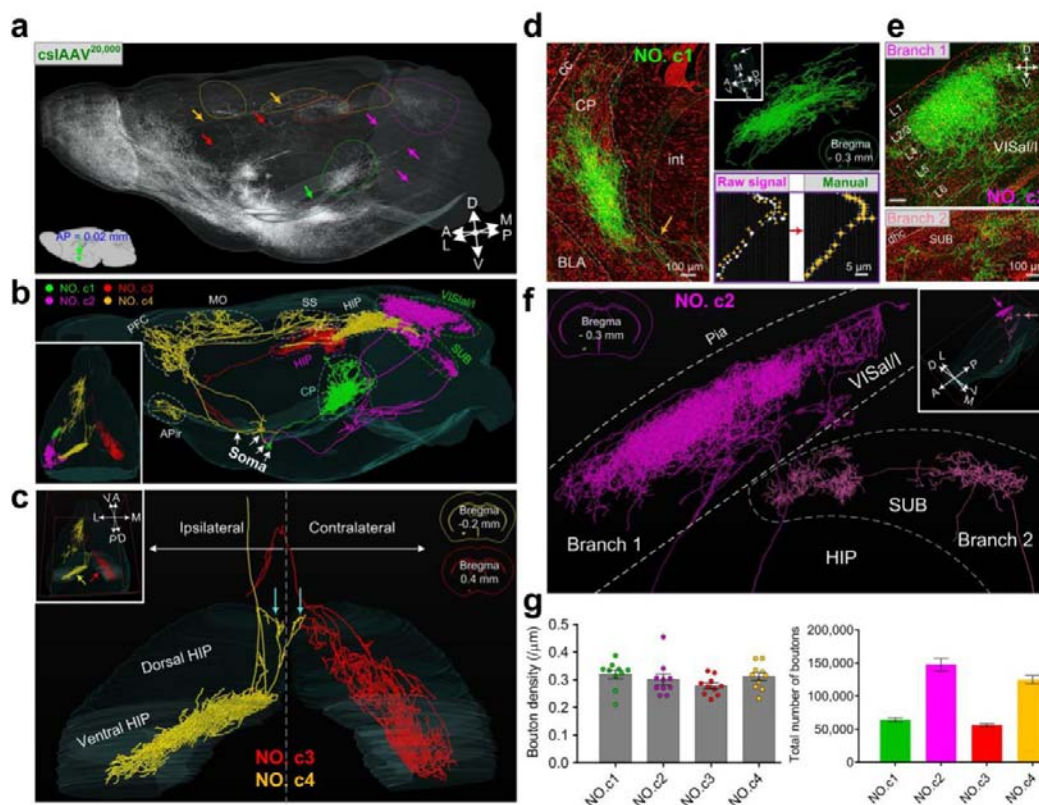

472

473

474 **Fig. 6 | MAP-ENVIVIDERS enables identification of presynapses of individual cell-type-specific**

475 **neurons. a**, Sagittal view showing whole-brain labeling after injection of csIAAV<sup>20,000</sup> into the basal

476 forebrain. Arrows indicate the main axons and colored circles indicate the terminal arborizations of

477 each reconstructed neuron. **j**, Summary of the axonal morphologies of four reconstructed cholinergic

478 neurons (No. c1-c4) in sagittal and the horizontal view (insets). **c**, Three dimensional view showing

479 terminal arborizations (indicated by arrows in upper left insets) in dorsal and ventral hippocampal

480 region (HIP) of two cholinergic neurons (No. c3: red; No. c4: yellow). Cyan arrows indicated a single

481 axonal branch of No. c4 with concomitant regulation of both ipsilateral and contralateral dorsal HIP. **d**,

482 Left panel, raw signal with propidium iodide (PI)-stained cytoarchitecture reference of neurons c1

483 (green: maximum intensity projection of 1,000 coronal sections; Red: 5  $\mu\text{m}$  thickness). Yellow arrow

484 indicated the main axon. Upper right panel: reconstructions of complex axonal arborizations in CP.

485 Lower right panel: enlargements of box region in upper left panel demonstrating schematic for manual

486 bouton counting in **g**. **e**, Raw signal with PI-stained cytoarchitecture reference showing complex axonal

487 arborizations in the anterolateral/lateral visual area (VISal/l; branch 1; upper) and subiculum (SUB;

488 branch 2; lower) of neurons c2. Branch 1 and branch 2 were maximum intensity projection of 1,800

489 and 400 coronal sections (green signal), respectively. Red signals were 5  $\mu\text{m}$  thickness for both. **f**,

490 Reconstructions of branch 1 and branch 2 in **e**. Brain outlines in **c,d,f** depicted approximate somal

491 locations of respective neurons. **g**, Averaged bouton density (left panel, n = 10 ROIs for each neuron)

492 and estimated total number of boutons (right panel) of four reconstructed cholinergic neurons. Each

circle represents one ROI. Abbreviations: see Supplementary Table 2.

493 **Copackaging of rAAVs significantly reduces their mutual suppression**

494 Since we demonstrated that MAP-ENVIVIDERS significantly improved the tracing  
495 efficiencies of input networks as well as enhanced the labeling brightness of output  
496 networks, we next made initial attempts to investigate probable mechanisms for the  
497 powerfulness of this viral copackaging-based labeling strategy. Previous studies have  
498 indicated that the interactions among different viral vectors, such as AAV over herpes  
499 simplex virus<sup>24</sup>, AAV over adenovirus<sup>25</sup>, or even among the same types of viruses  
500 (e.g., herpes simplex virus and pseudorabies virus)<sup>26-28</sup>, can severely affect their gene  
501 expressions. We next evaluated the degree of interaction between two different  
502 rAAVs. To eliminate the effects of other factors, we used two independently  
503 packaged, highly similar rAAVs, which were same serotyped (rAAV2/9) under the  
504 control of the same ubiquitous promoter (EF1 $\alpha$ ) but only expressing different  
505 fluorescent proteins (EYFP or mCherry). We injected equal ratio mixture of two  
506 rAAVs (abbreviated for sAAV-EYFP/mCherry for convenience, s refers to stranger  
507 hereafter) into the MOP of wild-type mice. For the controls, a parallel procedure was  
508 followed but with rAAV2/9-EYFP or rAAV2/9-mCherry mixed equally with  
509 phosphate-buffered saline (PBS). The fluorescence intensity was significantly lower  
510 for both EYFP and mCherry when the vectors were used in combination than when  
511 used separately (**Fig. 7a,b**), by a factor of 2.4 for EYFP and 1.4 for mCherry (**Fig. 7c**),  
512 demonstrating significant mutual suppression among different rAAVs.

513 Previous studies have employed viral copackaging strategy for cost- and time-  
514 effective AAV manufacturing<sup>29,30</sup>. We next examined whether viral copackaging  
515 strategy could increase homogeneity over independently packaged rAAVs. To  
516 achieve this, we copackaged the two corresponding plasmids at a 1:1 ratio and then  
517 injected the resulting rAAVs (abbreviated as lAAV-EYFP/mCherry, where l refers to  
518 littermate hereafter) into MOP as described above. Equivalent expressions of EYFP  
519 and mCherry within individual cells were observed more frequently in neurons co-  
520 infected by lAAV-EYFP/mCherry than in neurons coinfecting by sAAV-  
521 EYFP/mCherry, which instead tended to produce unbalanced expression of EYFP and  
522 mCherry (**Fig. 7d,e**, top vs. bottom rows). For neurons with unbalanced expressions  
523 (arrows in **Fig. 7e**), The ratio of mCherry/EYFP and EYFP/mCherry fluorescence  
524 intensity with higher mCherry and EYFP signals, respectively, was significantly  
525 higher in neurons injected with sAAV-EYFP/mCherry than in those injected with

526 IAAV-EYFP/mCherry (mCherry/EYFP ratio (pink arrows):  $3.44 \pm 0.76$  vs.  $1.46 \pm$   
 527  $0.20$ , respectively, and EYFP/mCherry ratio (cyan arrows):  $2.50 \pm 0.37$  vs.  $1.48 \pm$   
 528  $0.12$ , respectively; mean  $\pm$  s.e.m, unpaired t-test,  $P < 0.0001$ ,  $n = 3$  mice, **Fig. 7f**).  
 529 These results indicated that copackaging rAAVs can substantially reduce mutual  
 530 suppression and significantly enhance compatibility among different rAAVs.

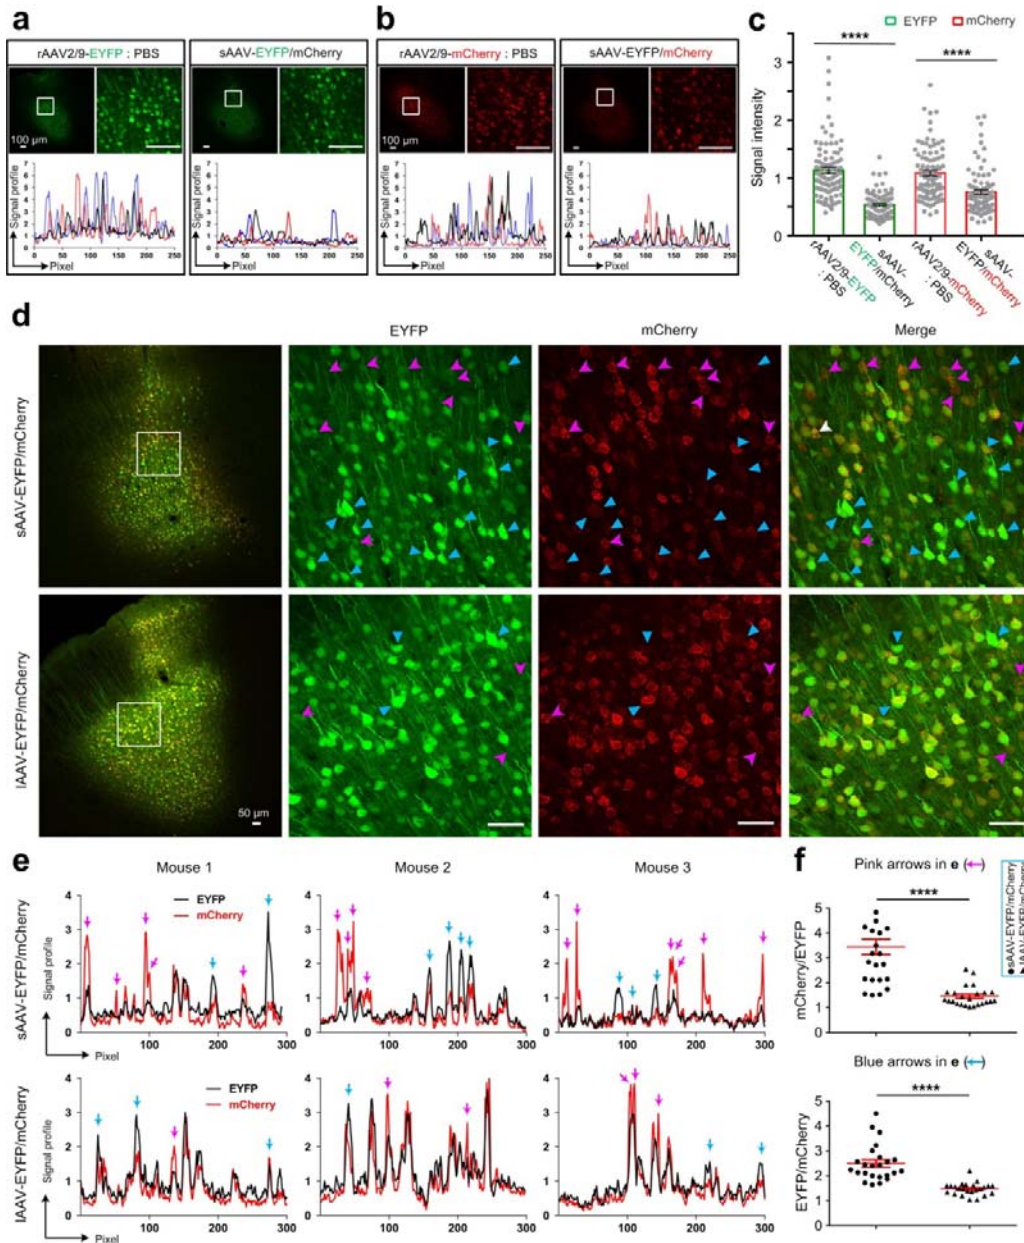

531

532 **Fig. 7 | Viral copackaging reduces rAAV suppression.** **a-b**, Representative confocal images and  
 533 signal profiles of EYFP and mCherry in neurons of the MOp of wild-type mice injected with 100nl 1:1  
 534 mixtures of rAAV2/9-EYFP : PBS, rAAV2/9-mCherry : PBS and rAAV2/9-EYFP : rAAV2/9-  
 535 mCherry (sAAV-EYFP/mCherry). **c**, Fluorescence intensity quantified in 90 neurons ( $n = 3$  animals)

536 from **a** and **b**. **d**, Representative confocal images showing expression of EYFP and mCherry in neurons  
537 of MOp of wild-type mice injected with 100nl sAAV-EFYP/mCherry (upper panel) or IAAV-  
538 EFYP/mCherry (lower panel). Pink and cyan arrowheads indicate neurons with higher EYFP and  
539 mCherry signals, respectively. **e**, Representative signal profiles of mCherry and EYFP in three mice  
540 injected with sAAV-EFYP/mCherry (upper panel) or IAAV-EFYP/mCherry (lower panel). Pink and  
541 cyan arrows indicate neurons with higher EYFP and mCherry signals, respectively. **f**, Ratio of  
542 mCherry/EYFP (pink arrows) and EYFP/mCherry (cyan arrows) fluorescence intensity in **e**. All data  
543 are presented as the mean  $\pm$  s.e.m., n = 3 animals for each group in **a-f**. Two-tailed t-test, \*\*\*\*P <  
544 0.0001.

545  
546

## DISCUSSION

547 In the present study, we developed MAP-ENVIVIDERS and generated series of  
548 vector mixing-based rAAV cocktail providing more efficient cell-type-specific  
549 whole-brain input mapping and improved super-bright and sparse labeling for certain  
550 types of neurons. We then found that strong mutual suppression existed among  
551 independently packaged rAAVs and copackaging of rAAV-producing plasmids  
552 enhanced co-expression of genes among multiple rAAVs.

553 Based on our results, we concluded that MAP-ENVIVIDERS were more  
554 prominent in complicated systems requiring co-expression of multiple rAAVs  
555 compared with previous strategy achieved by co-injections or co-administrations of  
556 several separately packaged rAAVs. For non-cell-type-specific super-bright and  
557 sparse labeling (co-expression of Cre and Cre-dependent fluorescent protein), MAP-  
558 ENVIVIDERS provided ~3-fold more labeled neurons and ~5-fold more bright  
559 fluorescent intensity (**Fig. 3c,d**). For cell-type-specific super-bright and sparse  
560 labeling (co-expression of Flp, Cre and Flp-/Cre-dependent fluorescent protein),  
561 MAP-ENVIVIDERS provided more than 10-fold increase of labeling efficiency (**Fig.**  
562 **5c** and **Supplementary Fig. 11d,e**). Thus, MAP-ENVIVIDERS could achieve the  
563 same efficiency with much lower dose of virus, which may reduce cytotoxicity and  
564 experimental cost. Notably, since MAP-ENVIVIDERS is very sensitive, careful  
565 consideration of mixing ratios for viral copackaging was needed to label desired  
566 number of neurons. For cell-type-specific super-bright/sparse labeling, the strength  
567 and abundance of Cre recombinase varies greatly among different cell types and brain



568 regions<sup>22,23</sup>, thus the mixing ratio of Flp and Flp-/Cre-dependent fluorescent protein  
569 need to be carefully tested.

570 Moreover, when MAP-ENVIVIDERS was applied for circuit tracing which  
571 involves not only compatibility two different rAAVs but coherence between two  
572 labeling systems (i.e., rAAVs-RV combination), labeling efficiency was dramatically  
573 increased (10- to 70-fold) for 40% of the input brain regions, which were sparsely  
574 labeled by previous strategies (**Fig. 1,2**). The much stronger DsRed signals and the  
575 larger number of total input neurons suggested that more RVs may be produced with  
576 the MAP-ENVIVIDERS strategy. This is probably due to the reduction of mutual  
577 suppression between the rAAVs expressing TVA and RG. The AAVs in the starter  
578 cells expressed more TVA and RG, leading to more entry and assemble of infectious  
579 RVs and eventually higher transsynaptic tracing efficiency (convergent index from  
580 averaged 32 to 52, **Supplementary Table 1**). Moreover, it is feasible to combine  
581 MAP-ENVIVIDERS with optimized RG (oG)<sup>10</sup> and other RV strains (e.g., the CVS-  
582 N2c<sup>ΔG</sup> strain)<sup>9</sup> to further improve the tracing efficiency. Further efforts towards these  
583 largely enhanced input neurons in diverse brain regions labeled by MAP-  
584 ENVIVIDERS including identifications the components of cell types with the aid of  
585 immunochemistry (homogeneous to the cell types labeled with current RV-mediated  
586 trans-monosynaptic tracing systems or not) and electrophysiology- or optogenetics-  
587 assisted functional studies.

588 Among diverse Cre-driver transgenic line for cell-type-specific neuronal labeling,  
589 Thy1 promoters-mediated lines exhibited the most robust gene expression levels<sup>37</sup>.  
590 With MAP-ENVIVIDERS, the fluorescent intensity of sparsely labeled neurons in  
591 choline acetyltransferase promoter- and dopamine transporter promoter-mediated lines  
592 approaching that achieved by Thy1 promoters (**Fig. 5j**). This unbiased property for  
593 cell-type-specific, sparse and super-bright labeling highlights the great sensitivity of  
594 MAP-ENVIVIDERS strategy. Combined with whole-brain imaging systems, MAP-  
595 ENVIVIDERS demonstrated great advantages for capturing more details of individual  
596 cell-type-specific neurons (e.g. an individual cholinergic neuron with ~9,500+ axonal  
597 branches and averaged 148,000 presynaptic axonal boutons) (**Fig. 6**). To obtain exact  
598 number of boutons of specific individual neurons faithfully, further efforts are needed  
599 including co-expressing fluorescent proteins with bouton indicative marker, such as

600 well-known synapophysin<sup>51</sup> along the axons, as well as developing automatic or semi-  
601 automatic softwares for bouton identification<sup>52</sup>.

602        Though further efforts are needed to explore the deeper mechanisms leading to  
603 the high sensitivity and efficiency of MAP-ENVIVIDERS, our initial attempts  
604 indicated that strong mutual suppression existed among different rAAVs, a  
605 phenomenon similar to other kinds of viruses, such as herpes simplex virus, hepatitis  
606 C virus and influenza A virus<sup>53,54</sup> (**Fig. 7a-c**). We further found that viral copackaging  
607 strategy significantly ameliorated this suppression and enhanced compatibility of  
608 multi-gene expressions in the same cells (**Fig. 7d-f**), the probable reasons for which  
609 were explained as follows: (i) Previous studies have demonstrated that the purities of  
610 rAAVs was a key determinant for their infection efficiency<sup>55-57</sup>. Viral copackaging  
611 strategy will reduce the heterogeneity of impurities, including cyto-toxins, cellular  
612 fragments and proteins, and culture media residues deprived from viral preparations  
613 of independently packaged rAAVs, thus reduce effect of strong immune responses on  
614 the state of the host cells near the injection site. (ii) Gene cassettes delivered by  
615 cocktails of rAAVs with different serotypes may elicit different immune responses,  
616 leading to varying reductions in gene expression<sup>58,59</sup>, which could also be avoided by  
617 viral copackaging. Thus, the amplification of signals by recombinase systems  
618 combined with effects of (i) and (ii) reasonably leads to significant improvements of  
619 efficiency.

620        Besides the anatomical studies, MAP-ENVIVIDERS is suitable for functional  
621 studies of neural circuitry<sup>60,61</sup> and may even be used in other organs beyond mammal  
622 brain. Furthermore, MAP-ENVIVIDERS also provides great potential to facilitate the  
623 co-expression of multiple genes and reduce the harmful effects for clinical gene  
624 therapy<sup>61</sup>.

## 625 **References**

- 626 1. Watabe-Uchida, M., Zhu, L., Ogawa, S. K., Vamanrao, A. & Uchida, N. Whole-brain mapping  
627 of direct inputs to midbrain dopamine neurons. *Neuron* **74**, 858–873 (2012).
- 628 2. Schwarz, L. A. *et al.* Viral-genetic tracing of the input-output organization of a central  
629 noradrenaline circuit. *Nature* **524**, 88–92 (2015).
- 630 3. Miyamichi, K. *et al.* Dissecting local circuits: parvalbumin interneurons underlie broad feedback  
631 control of olfactory bulb output. *Neuron* **80**, 1232–1245 (2013).

- 632 4. Ogawa, S. K., Cohen, J. Y., Hwang, D., Uchida, N. & Watabe-Uchida, M. Organization of  
633 monosynaptic inputs to the serotonin and dopamine neuromodulatory systems. *Cell Rep.* **8**, 1105–1118  
634 (2014).
- 635 5. Miyamichi, K. *et al.* Dissecting local circuits: parvalbumin interneurons underlie broad feedback  
636 control of olfactory bulb output. *Neuron* **80**, 1232–1245 (2013).
- 637 6. Weissbourd, B. *et al.* Presynaptic partners of dorsal raphe serotonergic and GABAergic  
638 neurons. *Neuron* **83**, 645–662 (2014).
- 639 7. Callaway, E. M. & Luo, L. Monosynaptic circuit tracing with glycoprotein-deleted rabies  
640 viruses. *J. Neurosci.* **35**, 8979–8985 (2015).
- 641 8. Miyamichi, K. *et al.* Cortical representations of olfactory input by trans-synaptic tracing.  
642 *Nature* **472**, 191–196 (2011).
- 643 9. Reardon, T. R. *et al.* Rabies virus CVS-N2c strain enhances retrograde synaptic transfer and  
644 neuronal viability. *Neuron* **89**, 711–724 (2016).
- 645 10. Kim, E. J., Jacobs, M. W., Ito-Cole, T. & Callaway, E. M. Improved monosynaptic neural circuit  
646 tracing using engineered rabies virus glycoproteins. *Cell Rep.* **15**, 692–699 (2016).
- 647 11. Winnubst, J. *et al.* Reconstruction of 1,000 projection neurons reveals new cell types and  
648 organization of long-range connectivity in the mouse brain. *Cell* **179**, 268–281 (2019).
- 649 12. Economo, M. N. *et al.* A platform for brain-wide imaging and reconstruction of individual  
650 neurons. *eLife* **5**, e10566 (2016).
- 651 13. Lin, R. *et al.* Cell-type-specific and projection-specific brain-wide reconstruction of single neurons.  
652 *Nat. Methods* **15**, 1033–1036 (2018).
- 653 14. Ren, J. *et al.* Single-cell transcriptomes and whole-brain projections of serotonin neurons in the  
654 mouse dorsal and median raphe nuclei. *eLife* **8**, e49424 (2019).
- 655 15. De Paola, V. *et al.* Cell type-specific structural plasticity of axonal branches and boutons in the  
656 adult neocortex. *Neuron* **49**, 861–875 (2006).
- 657 16. Stettler, D. D., Yamahachi, H., Li, W., Denk, W. & Gilbert, C. D. Axons and synaptic boutons are  
658 highly dynamic in adult visual cortex. *Neuron* **49**, 877–887 (2006).
- 659 17. Grillo, F. W. *et al.* A distance-dependent distribution of presynaptic boutons tunes frequency-  
660 dependent dendritic integration. *Neuron* **99**, 275–282 (2018).
- 661 18. Grillo, F. W. *et al.* Increased axonal bouton dynamics in the aging mouse cortex. *Proc. Natl. Acad.*  
662 *Sci. USA* **110**, E1514–E1523 (2013).
- 663 19. Fenno, L. E. *et al.* Targeting cells with single vectors using multiple-feature Boolean logic. *Nat.*  
664 *Methods* **11**, 763–772 (2014).
- 665 20. Luo, L., Callaway, E. M. & Svoboda, K. Genetic dissection of neural circuits: a decade of  
666 progress. *Neuron* **98**, 256–281 (2018).
- 667 21. Huang, Z. J. & Zeng, H. Genetic approaches to neural circuits in the mouse. *Annu. Rev.*  
668 *Neurosci.* **36**, 183–215 (2013).
- 669 22. Gerfen, C. R., Paletzki, R. & Heintz, N. GENSAT BAC cre-recombinase driver lines to study the  
670 functional organization of cerebral cortical and basal ganglia circuits. *Neuron* **80**, 1368–1383 (2013).
- 671 23. Gong, S. *et al.* Targeting Cre recombinase to specific neuron populations with bacterial

- 672 artificial chromosome constructs. *J. Neurosci.* **27**, 9817–9823 (2007).
- 673 24. Bantel-Schaal, U. & H, zur Hausen. Adeno-associated viruses inhibit SV40 DNA amplification and  
674 herpes simplex virus replication in SV40-transformed hamster cells. *Virology* **164**, 64–74 (1988).
- 675 25. Timpe, J. M., Verrill, K. C. & Trempe, J. P. Effects of adeno-associated virus on adenovirus  
676 replication and gene expression during coinfection. *J. Virol.* **80**, 7807–7815 (2006).
- 677 26. Criddle, A., Thornburg, T., Kochetkova, I., DePartee, M. & Taylor, M. P. gD-independent  
678 superinfection exclusion of alphaherpesviruses. *J. Virol.* **90**, 4049–4058 (2016).
- 679 27. Kim, J. S., Enquist, L. W. & Card, J. P. Circuit-specific coinfection of neurons in the rat central  
680 nervous system with two pseudorabies virus recombinants. *J. Virol.* **73**, 9521–9531 (1999).
- 681 28. Kobiler, O., Lipman, Y., Therkelsen, K., Daubechies, I. & Enquist, L.W. Herpesviruses carrying a  
682 Brainbow cassette reveal replication and expression of limited numbers of incoming genomes. *Nat.*  
683 *Commun.* **1**, 146 (2010).
- 684 29. Doerfler, P. A., Byrne, B. J. & Cle´ment, N. Copackaging of Multiple Adeno-Associated Viral  
685 Vectors in a Single Production Step. *Hum. Gene Ther. Methods* **25**, 269–276 (2014).
- 686 30. Wang, Q. *et al.* Efficient production of dual recombinant adeno-associated viral vectors for  
687 factor VIII delivery. *Hum Gene Ther. Methods* **25**, 261–268 (2014).
- 688 31. Pan, C. *et al.* Shrinkage-mediated imaging of entire organs and organisms using uDISCO. *Nat.*  
689 *Methods* **13**, 859–867 (2016).
- 690 32. Zhang, S. *et al.* Organization of long-range inputs and outputs of frontal cortex for top-down  
691 control. *Nat. Neurosci.* **19**, 1733–1742 (2016).
- 692 33. Do, J. P. *et al.* Cell type-specific long-range connections of basal forebrain circuit. *eLife* **5**,  
693 e13214 (2016).
- 694 34. Sohal, V. S., Zhang, F., Yizhar, O. & Deisseroth, K. Parvalbumin neurons and gamma rhythms  
695 enhance cortical circuit performance. *Nature* **459**, 698–702 (2009).
- 696 35. Holtmaat, A. & Svoboda, K. Experience-dependent structural synaptic plasticity in the  
697 mammalian brain. *Nat. Rev. Neurosci.* **10**, 647–658 (2009).
- 698 36. Feng, G. *et al.* Imaging neuronal subsets in transgenic mice expressing multiple spectral  
699 variants of GFP. *Neuron* **28**, 41–51 (2000).
- 700 37. Xiong, H. *et al.* Whole mouse brain fluorescence imaging at synaptic resolution (in  
701 preparations).
- 702 38. Mao, T. *et al.* Long-range neuronal circuits underlying the interaction between sensory and  
703 motor cortex. *Neuron* **72**, 111–123 (2011).
- 704 39. Kita, T. & Kita, H. The subthalamic nucleus is one of multiple innervation sites for long-range  
705 corticofugal axons: a single-axon tracing study in the rat. *J. Neurosci.* **32**, 5990–5999 (2012).
- 706 40. Jeong, M. *et al.* Comparative three-dimensional connectome map of motor cortical projections  
707 in the mouse brain. *Sci. Rep.* **6**, 20072 (2016).
- 708 41. Shepherd, G. M. Corticostriatal connectivity and its role in disease. *Nat. Rev. Neurosci.* **14**,  
709 278–291 (2013).
- 710 42. Harris, K. D. & Shepherd, G. M. The neocortical circuit: themes and variations. *Nat.*  
711 *Neurosci.* **18**, 170–181 (2015).



- 712 43. Fenno, L. E., Mattis, J., Ramakrishnan, C. & Deisseroth, K. A guide to creating and testing new  
713 INTRSECT constructs. *Curr. Protoc. Neurosci.* **80**, 4.39.1–4.39.24 (2017).
- 714 44. Li, X. *et al.* Generation of a whole-brain atlas for the cholinergic system and mesoscopic  
715 projectome analysis of basal forebrain cholinergic neurons. *Proc. Natl Acad. Sci. USA* **115**, 415–420  
716 (2018).
- 717 45. Lammel, S. *et al.* Diversity of transgenic mouse models for selective targeting of midbrain  
718 dopamine neurons. *Neuron* **85**, 429–438 (2015).
- 719 46. Wu, H., Williams, J., & Nathans, J. Complete morphologies of basal forebrain cholinergic neurons  
720 in the mouse. *eLife* **3**, e02444 (2014).
- 721 47. Pinto, L. *et al.* Fast modulation of visual perception by basal forebrain cholinergic neurons. *Nat.*  
722 *Neurosci.* **16**, 1857–1863 (2013).
- 723 48. Ballinger, E. C., Ananth, M., Talmage, D. A. & Role, L. W. Basal forebrain cholinergic circuits and  
724 signaling in cognition and cognitive decline. *Neuron* **91**, 1199–1218 (2016).
- 725 49. Schmid, L. C. *et al.* Dysfunction of somatostatin-positive interneurons associated with memory  
726 deficits in an Alzheimer's disease model. *Neuron* **92**, 114–125 (2016).
- 727 50. Chen, S. X., Kim, A. N., Peters, A. J. & Komiyama, T. Subtype-specific plasticity of inhibitory  
728 circuits in motor cortex during motor learning. *Nat. Neurosci.* **18**, 1109–1115 (2015).
- 729 51. Wiedenmann, B. & Franke, W. W. Identification and localization of synaptophysin, an integral  
730 membrane glycoprotein of Mr 38,000 characteristic of presynaptic vesicles. *Cell* **41**, 1017–1028 (1985).
- 731 52. Cheng, S. *et al.* DeepBouton: Automated identification of single-neuron axonal boutons at the  
732 brain-wide scale. *Front Neuroinform.* **13**, 25 (2019).
- 733 53. Schaller, T. *et al.* Analysis of hepatitis C virus superinfection exclusion by using novel  
734 fluorochrome gene-tagged viral genomes. *J. Virol.* **81**, 4591–4603 (2007).
- 735 54. Huang, I. C. *et al.* Influenza A virus neuraminidase limits viral superinfection. *J. Virol.* **82**, 4834–  
736 4843 (2008).
- 737 55. Zolotukhin, S. *et al.* Recombinant adeno-associated virus purification using novel methods  
738 improves infectious titer and yield. *Gene Ther.* **6**, 973–985 (1999).
- 739 56. Ayuso, E. *et al.* High AAV vector purity results in serotype- and tissue-independent enhancement  
740 of transduction efficiency. *Gene Ther.* **17**, 503–510 (2010).
- 741 57. Schnodt, M. & Buning, H. Improving the quality of adeno-associated viral vector preparations:  
742 the challenge of product-related impurities. *Hum. Gene Ther. Methods* **28**, 101–108 (2017).
- 743 58. Kotterman, M. A., Chalberg, T. W. & Schaffer, D. V. Viral vectors for gene therapy: translational  
744 and clinical outlook. *Annu. Rev. Biomed. Eng.* **17**, 63–89 (2015).
- 745 59. Naso, M. F., Tomkowicz, B., Perry, W. L., III, & Strohl, W. R. Adeno-associated virus (AAV) as a  
746 vector for gene therapy. *BioDrugs* **31**, 317–334 (2017).
- 747 60. Wang, W. *et al.* A light- and calcium-gated transcription factor for imaging and manipulating  
748 activated neurons. *Nat. Biotechnol.* **35**, 864–871 (2017).
- 749 61. Lee, D., Hyun, J. H., Jung, K., Hannan, P. & Kwon, H. B. A calcium and light-gated switch to  
750 induce gene expression in activated neurons. *Nat. Biotechnol.* **35**, 858–863 (2017).

- 751 62. Kotterman, M. A. & Schaffer, D. V. Engineering adeno-associated viruses for clinical gene  
752 therapy. *Nat. Rev. Genet.* **15**, 445–451 (2014).
- 753 63. Grieger, J. C., Choi, V. W. & Samulski, R. J. Production and characterization of adeno-  
754 associated viral vectors. *Nat. Protoc.* **1**, 1412–1428 (2006).
- 755 64. Osakada, F. & Callaway, E. M. Design and generation of recombinant rabies virus vectors. *Nat.*  
756 *Protoc.* **8**, 1583–1601 (2013).
- 757 65. Paxinos, G. & Franklin, K. B. J. *The Mouse Brain in Stereotaxic Coordinates* (Academic Press,  
758 2001).
- 759 66. Xiong, H. *et al.* Chemical reactivation of quenched fluorescent protein molecules enables resin-  
760 embedded fluorescence microimaging. *Nat. Commun.* **5**, 3992 (2014).
- 761 67. Gong, H. *et al.* High-throughput dual-colour precision imaging for brain-wide connectome with  
762 cytoarchitectonic landmarks at the cellular level. *Nat. Commun.* **7**, 12142 (2016).

763

## 764 **METHODS**

765 **Animals.** All animal experimental procedures were approved by the Institutional  
766 Animal Ethics Committee of Huazhong University of Science and Technology  
767 (HUST) and Wuhan Institute of Physics and Mathematics (WIPM). All mice used in  
768 this study were 2-month-old male mice, including C57BL/6J mice, Thy1-EYFP-H  
769 line transgenic mice (Jackson Laboratory, stock number 003782, USA), Thy1-Cre  
770 transgenic mice (Jackson Laboratory, stock number 006143, USA), ChAT-Cre  
771 transgenic mice (Jackson Laboratory, stock number 006410, USA) and DAT-Cre  
772 transgenic mice (Jackson Laboratory, stock number 006660, USA).

773 **Virus preparations.** All viruses used in this study were customized or commercially  
774 provided by BrainVTA Science and Technology Company (Wuhan, China). Three  
775 general types of viruses were used: copackaged littermate AAVs (lAAVs, l refers to  
776 littermate) for enhancing viral compatibility and coherence among different viruses,  
777 independently packaged stranger AAVs (sAAVs, s refers to stranger) as control, and  
778 genetically modified RV (EnvA-SADΔG-DsRed) for retrograde trans-monosynaptic  
779 labeling. Production of rAAVs and genetically modified RV were prepared as  
780 previously described<sup>63,64</sup>.

781 Both general types of AAVs were serotype 2/9. They were used for four purposes:  
782 (i) non-cell-type-specific; (ii) cell-type-specific neuronal labeling; (iii) trans-  
783 monosynaptic labeling of the direct input network of specific type of starter cells as  
784 well as (v) verification of viral interactions, enhancing infection and exogenous gene  
785 expression efficiency.

786 For purpose (i), the plasmids were AAV-EF1 $\alpha$ -double floxed-EYFP-WPRE-  
787 HGHpA<sup>34</sup> (Addgene #20296, a generous gift from Dr. Karl Deisseroth, Stanford  
788 University) and AAV-CMV-Cre. The littermate rAAVs were IAAV<sup>20,000</sup>, IAAV<sup>200,000</sup>  
789 and IAAV<sup>1,000,000</sup>. As controls, one of the two stranger rAAVs, rAAV2/9-CMV-Cre,  
790 was initially diluted to ratios of 1:20,000, 1:40,000, 1:80,000 and 1:1,000,000 in  
791 phosphate-buffered saline (PBS) before mixed equally with the other stranger rAAV,  
792 rAAV2/9-EF1 $\alpha$ -double floxed-EYFP based on previous methods<sup>12</sup> (the resulting  
793 rAAVs were abbreviated for sAAV<sup>20,000</sup>, sAAV<sup>40,000</sup>, sAAV<sup>80,000</sup> and sAAV<sup>1,000,000</sup>,  
794 respectively).

795 For purpose (ii), the plasmids were AAV-hSyn Con/Fon EYFP<sup>43</sup> (Addgene  
796 #55650, a generous gift from Dr. Karl Deisseroth, Stanford University) and AAV-  
797 EF1 $\alpha$ -Flp. The littermate rAAVs were csIAAV<sup>2,000</sup>, csIAAV<sup>8,000</sup> and csIAAV<sup>20,000</sup> (cs  
798 refers cell-type-specific). Similarly, one of the two stranger rAAVs, rAAV2/9-EF1 $\alpha$ -  
799 Flp, was diluted to ratios of 1:2,000 and 1:20,000 in PBS, followed by equal mixing  
800 with the other stranger rAAV, rAAV2/9-hSyn Con/Fon EYFP (the resulting rAAVs  
801 were abbreviated for cssAAV<sup>2,000</sup> and cssAAV<sup>20,000</sup>, respectively).

802 For purpose (iii), the plasmids were AAV-EF1 $\alpha$ -DIO-EGFP-TVA (GT) and  
803 AAV-EF1 $\alpha$ -DIO-RG, and the littermate rAAVs, IAAV-DIO-GT/RG, had a ratio of  
804 1:2. For the preparation of stranger rAAVs (sAAV-DIO-GT/RG), rAAV2/9-EF1 $\alpha$ -  
805 DIO-GT and rAAV2/9-EF1 $\alpha$ -DIO-RG were mixed at a ratio of 1:2.

806 For purpose (v), plasmids AAV-EF1 $\alpha$ -EYFP and AAV-EF1 $\alpha$ -mCherry were  
807 copackaged at a 1:1 ratio or independently packaged in HEK293T cells, generating  
808 the corresponding littermate rAAV2/9-EF1 $\alpha$ -EYFP/mCherry (abbreviated for IAAV-  
809 EFYP/mCherry for convenience). As controls, the two stranger rAAVs, rAAV2/9-  
810 EF1 $\alpha$ -EYFP and rAAV2/9-EF1 $\alpha$ -mCherry, were mixed at a 1:1 ratio before  
811 experiments (abbreviated for sAAV-EFYP/mCherry).

812 The concentrations of the plasmids and the titers of all viruses are listed in  
813 **Supplementary Table 5.**

814 **Virus injections.** All virus injection experiments were performed in Biosafety level 2  
815 (BSL-2) environments. Mice were placed into a stereotaxic apparatus (#68030, RWD  
816 Life Science, China) and fixed with a nose clamp and ear bars after being deeply  
817 anesthetized by isoflurane. A small hole was made over the skull via a dental drill  
818 following the incision of the scalp along the midline of the brain. The coordinates for  
819 the injections were as follows based on *The Mouse Brain in Stereotaxic Coordinates*<sup>65</sup>:

820 MOp (AP: 1.54 mm; ML: -1.6 mm; DV: -1.6 mm); CA3 (AP: -1.7 mm; ML: -2.0 mm;  
821 DV: -2.0 mm); CA1 (AP: -1.7 mm; ML: -1.0 mm; DV: -1.5 mm); basal forebrain: (AP:  
822 0.21 mm; ML: -1.5 mm; DV: -5.5 mm) and VTA (AP: -3.4 mm; ML: -1.6 mm; DV: -  
823 1.6 mm).

824 For comparisons of transsynaptic spreading efficiency (**Figs. 1,2** and  
825 **Supplementary Figs. 2-4**), the procedures for MAP-ENVIVIDERS and the classical  
826 rAAV-RV systems were similar to the reported<sup>32,33</sup>, with injected volume as 80 nl for  
827 both IAAV-DIO-GT/RG and sAAV-DIO-GT/RG. Three weeks later, 150 nl EnvA-  
828 SADΔG-DsRed was injected into the same site of Thy1-Cre transgenic mice.

829 For non-cell-type-specific and cell-type-specific neuronal labeling, 100 nl  
830 littermate rAAVs (IAAVs and cslAAVs) and stranger rAAVs (sAAVs and cssAAVs)  
831 were injected for C57BL/6J mice (**Fig. 3,4** and **Supplementary Figs. 5-10,11c,14**)  
832 and Cre-driver transgenic lines (**Fig. 5,6** and **Supplementary Figs. 11a,b,d,e,12-15**).

833 For comparisons of sAAV-EFYP/mCherry with pure rAAVs (**Fig. 7a-c**) and  
834 sAAV-EFYP/mCherry with IAAV-EFYP/mCherry (**Fig. 7d-f**), similar titers of sAAV-  
835 EFYP/mCherry, rAAV2/9-EF1α-EYFP/PBS mixture (ratio of 1:1) and rAAV2/9-  
836 EF1α-mCherry/PBS mixture with a volume of 100 nl were injected into the MOp of  
837 C57BL/6J mice.

838 All virus solutions used were injected with a pulled glass micropipette at a rate of  
839 20 nl/ min. The micropipette remained in place for at least 5 min before withdrawal  
840 from the brain. After recovery, the mice were housed carefully until perfusion.

841 **Perfusion and slicing.** Three weeks after AAV injections and nine days after rabies  
842 virus injections, mice were perfused transcardially with 0.01 M PBS followed by 4%  
843 paraformaldehyde (PFA) in 0.01 M PBS. The extracted intact brains were postfixed  
844 overnight at 4°C and placed in 30% sucrose for 48-72 h, and 50-μm frozen sections  
845 were maintained across the whole brain (except that one mouse of IAAV<sup>1,000,000</sup> where  
846 sections of injection site were cut into 100-μm to maintain the structures of local  
847 axons, **Supplementary Fig. 5a**) with a freezing microtome (CryoStar NX50 cryostat,  
848 Thermo Scientific, San Jose, CA). All brain slices were stored in a 24-well plate with  
849 PBS, and representative slices with labeled neurons in the injection site and long-  
850 range projections away from the injection site were identified with a Slide-scanning  
851 Microscope (Nikon Ni-E, Japan) for further analysis.

852 **Immunohistochemistry.** Brain slices at the injection site of cslAAV<sup>20,000</sup>-labeled  
853 ChAT-Cre transgenic mice (**Fig. 5c** and **Supplementary Fig. 7**) and cslAAV<sup>8,000</sup>-

854 labeled DAT-Cre transgenic mice were selected for immunostaining. The following  
855 antibodies: (i) Primary antibody, including goat anti-choline acetyltransferase  
856 (Millipore, AB144p, 1:200) and Rabbit anti-TH (abcam, ab112, 1:500); (ii) Secondary  
857 antibody, rabbit anti-Goat cy3 (Jackson ImmunoResearch, 305-165-003, 1:500), Goat  
858 anti-rabbit Alexa 555 (Invitrogen, A21429, 1:500) were used in this study. Briefly, the  
859 selected 50- $\mu\text{m}$  floating sections were initially blocked in 10% rabbit serum in PBS  
860 with 0.3% Triton X-100 (PBST) for 1 h at 37°C and then washed with 0.3% PBST 10  
861 min three times. Subsequently, sections were incubated in corresponding primary  
862 antibodies at 4°C for 48-72 h followed by washes with 0.3% PBST 10 min three times  
863 and incubation in corresponding secondary antibodies at room temperature for 2 h.

864 **Image Acquisition.** All brain slices were counterstained with 4',6-diamidino-2-  
865 phenylindole (DAPI) to determine the cortical and laminar borders, coverslipped with  
866 Anti-fade Fluorescence Mounting Medium (Beyotime Biotechnology, China) and  
867 sealed with nail polish for imaging.

868 To quantify the whole-brain direct input neurons (**Fig. 2, Supplementary Fig. 4**  
869 and **Supplementary Table 1**), all coronal sections throughout ten brains labeled by  
870 MAP-ENVIVIDERS and classical rAAV-RV system were obtained through Nikon  
871 VS120 (Japan) with two (one for DAPI, one for DsRed) or three channels (the third  
872 for EGFP in injection site).

873 Except for images for input cells counting, all the other fluorescent images  
874 presented were acquired with a confocal laser scanning microscope (LSM710; Carl  
875 Zeiss, Germany) equipped with 405/488/514/561/633 excitation laser lines. 10x  
876 objectives (NA0.5) with a step size of 2  $\mu\text{m}$ , 20x (NA0.8) with a step size of 1  $\mu\text{m}$ ,  
877 and 40x oil (NA1.4) with a step size of 0.39  $\mu\text{m}$  were used. Generally, whole coronal  
878 sections containing the injection site were acquired at 10x (NA0.5) with a zoom of 1  
879 or at 20x (NA0.8) with a zoom of 0.6. Regions of labeled somas were imaged and  
880 obtained in z-stacks with 10x (step size: 2  $\mu\text{m}$ ) or 20x objectives (step size: 1  $\mu\text{m}$ ). To  
881 obtain fine structures such as dendrite and axonal arborizations, 40x oil (step size:  
882 0.39  $\mu\text{m}$ ) with a zoom of 1 was used for most images except for proximal spines of  
883 CA3 pyramidal neurons, where a zoom of 2 or 3 with the same objective was used  
884 (**Supplementary Fig. 8d**).

885 To faithfully compare the signal intensities among different labeling conditions  
886 (single virus vs. mixed viruses, littermate vs. stranger mixture, and littermate mixture  
887 vs. Thy1-EYFP-H line transgenic mice), parameters were adjusted low enough to

888 ensure the fluorescent signal unsaturated, and then the same set of parameters was  
889 applied to all samples. The acquired z-stacks were stored in 16-bit depth TIFF format.

890 **Resin Embedding.** For whole-brain imaging with the TDI-fMOST system, a  
891 IAAV<sup>200,000</sup>-labeled MOp mouse sample and a cslAAV<sup>20,000</sup>-labeled basal forebrain  
892 mouse sample were embedded with Technovit 9100 Methyl Methacrylate (MMA,  
893 Electron Microscopy Sciences, USA) according to previous procedures with minor  
894 optimizations<sup>66</sup>. Briefly, the removed PFA postfixed mouse brains were first rinsed in  
895 0.01 M PBS for 12 h followed by complete dehydration in a series of alcohol (50%,  
896 75%, 95%, 100%, and 100% ethanol, 2 h for each) and then xylene solution (twice, 2  
897 h for each) for transparentization. The transparent brain was treated with sequential  
898 infiltration solutions (50%, 75%, 100%, and 100% resin in 100% ethanol, 2 h each for  
899 the first three solutions and 48 h for the final solution). Finally, the infiltrated brain  
900 was placed into a gelatin capsule filled with polymerization solution and kept in a dry  
901 chamber at -4°C in the dark for 72 h for polymerization before whole-brain sectioning.

902 **Dual-color, whole-brain imaging with the TDI-fMOST system.** Brain-wide images  
903 of the embedded mouse brain were acquired with the TDI-fMOST system at a voxel  
904 size of  $0.176 \times 0.176 \times 1 \mu\text{m}^3$  (unpublished data)<sup>37</sup>. Dual-color, whole-brain imaging  
905 with real-time propidium iodide (PI) staining was performed as previously described<sup>67</sup>.  
906 The embedded mouse brain was immersed in 0.05 M Na<sub>2</sub>CO<sub>3</sub> solution to enhance the  
907 EYFP signal and decrease the fluorescence background during the process of imaging  
908 and sectioning<sup>66</sup>. A 60x water-immersed objective (NA 1.0) was used to image the  
909 surface layer of the brain sample with an axial step size of 1  $\mu\text{m}$  each cycle prior to  
910 sectioning with a diamond knife. Each coronal section was acquired with 16-bit and  
911 8-bit depth for the green and PI channels, respectively. After ten to twelve days of  
912 uninterrupted imaging and sectioning, we eventually obtained whole-brain raw data  
913 with a total of 12,841 continuous coronal sections for the MOp brain sample (70.2 TB  
914 with 46.4 TB for green and 23.8 TB for red channels) and 10,781 continuous coronal  
915 sections for the BF brain sample (54.7 TB with 36.8 TB for green and 17.9 TB red  
916 channels), respectively.

917 **Image processing.** Raw data acquired with the dual-color TDI-fMOST system were  
918 preprocessed based on reported methods<sup>67</sup>, including seamless stitch and image  
919 registration for two channels. The preprocessed images were stored in an LZW  
920 compression TIFF format, with 16-bit depth for the green channel and 8-bit depth for  
921 the PI channel. For the generation of 3D reconstructions of brain-wide long-range



922 projections of the MOp and basal forebrain mouse sample, we selected 12,740 and  
923 10,780 continuous coronal sections from the respective green-channel data set and  
924 resampled to  $2 \times 2 \times 4 \mu\text{m}^3$  before loading them into the Amira software (Visage  
925 Software, San Diego, CA). For the presentation of the MOp whole-brain dataset  
926 (**Supplementary Fig. 9**), coronal sections with maximum intensity projections  
927 (**Supplementary Fig. 9a-m**) were resampled to  $0.6 \times 0.6 \mu\text{m}^2$  due to the large image  
928 size, and images to display fine structures, including somas, axonal branches and  
929 axonal arborizations (residual images in **Supplementary Fig. 9**) were all selected  
930 from corresponding coronal sections of original resolution ( $0.176 \times 0.176 \mu\text{m}^2$ ).

931 Raw data acquired with Nikon VS120 for whole-brain cell counting of input  
932 networks were transformed into JPG formats suitable for the following analysis. All  
933 confocal images were stored in lossless TIFF format. Image processing, including  
934 maximum intensity projection of serial z-stacks, adjusting brightness, and contrast of  
935 the composite images and selection of regions of interest, were performed with  
936 ImageJ (National Institutes of Health, USA). In addition, images imported from the  
937 Amira software were also processed as mentioned.

938 **Morphology reconstructions of individual neurons in MOp and BF.** These  
939 reconstructions were performed in the Filament Editor module of the Amira software  
940 (Mercury Computer Systems, San Diego, CA, USA) via a human-machine interaction  
941 pattern. For the reconstructions of neurons 1-8, we randomly chose two neurons in L2,  
942 one neuron in L3, one neuron in L6a and four neurons in L5b and started neuronal  
943 tracing from the soma. We first traced local axons projecting from the main axons,  
944 followed by the tracing of main axons projecting to contralateral parts or subcortical  
945 regions. For the reconstructions of neurons **s1-s3**, we selected axons in the anterior  
946 commissure (ac) as a start point and traced in two opposite directions, with one  
947 towards the ipsilateral part and the other towards the contralateral part. For the  
948 reconstructions of neurons **c1-c4**, we selected complex axonal arborizations in the  
949 ipsilateral anterolateral/lateral visual area (VISal/l), ipsilateral caudoputamen (CP),  
950 ipsilateral and contralateral hippocampus as the start point and traced retrogradely.  
951 Because the axonal arborizations of most neurons were extremely complex and  
952 intermingled with each other, we made detailed registrations of the number and  
953 projection directions of all the branches to avoid negligence. For better differentiation,  
954 each part of the neuron, including the local axons, ipsilateral branches, and  
955 contralateral branches, were reconstructed separately. A constant  $1000 \times 1000 \times 400$

956  $\mu\text{m}^3$  data block was imported into the Amira software in each cycle of tracing. After  
957 complete reconstructions of all arborizations of one branch, we moved to the next  
958 branch and repeated the tracing steps until all the branches projecting from the main  
959 axons were reconstructed. During the process of tracing, two tracing modules, thin  
960 structure and linear options were used alternatively according to the sparseness of the  
961 axonal projections. For example, if the axonal projections were sparse and not  
962 interfered by other axons, the thin structure module was used to depict the axonal  
963 projection path from the start point to the end; otherwise, the linear module was  
964 utilized to gradually trace the path. The brightness and thickness of the data block  
965 were adjusted from time to time in the process of tracing based on the different  
966 conditions of the axonal projections. The dendrite morphologies of all neurons were  
967 reconstructed in the same way as axonal tracing but separately for convenient  
968 subsequent analysis. The tracing results for each neuron, including the axonal  
969 projections and dendrite morphologies, were rechecked by different skilled  
970 technicians, and neurons with uncertainties were excluded from the final results. The  
971 locations of nuclei were based on the Allen Brain Atlas ([http://mouse.brain-  
972 map.org/static/atlas](http://mouse.brain-map.org/static/atlas)) with the aid of PI-staining signals.

973 The reconstructed axons and dendrites of neurons **s1-s3** and **c1-c4** were saved in SWC  
974 files for the quantitative analysis of the branches and length in the software  
975 NeuroLucida Explorer (MicroBrightField, USA).

976 **Axonal bouton counting.** To make faithful manual counting of axonal boutons, we  
977 initially processed the raw signal of  $\text{cslAAV}^{20,000}$ -labeled basal forebrain mouse  
978 sample with 20- to 100  $\mu\text{m}$ -thickness maximum-intensity projections depend on the  
979 sparseness of axons. Subsequently, we randomly selected ten regions of interest  
980 (ROIs) from respective coronal sections of four cholinergic neurons (No. c1-c4).  
981 Counting of axonal boutons along the axonal shaft in each ROI were performed  
982 manually using multi-point tool in ImageJ according to the previously published  
983 criteria<sup>15,16</sup> (**Figs. 6d** and **Supplementary Fig. 15**). The axonal pathway in each ROI  
984 was depicted in Amira software as mentioned above. The averaged bouton density  
985 (bouton/ $\mu\text{m}$ ) in each ROI was defined as the ratio of total number of boutons over  
986 axonal length (**Figs. 6g** left). Based on the averaged bouton density of ten ROIs and  
987 total axonal length of reconstructed neurons, estimated total number of boutons of  
988 each cholinergic neuron was thus obtained (**Figs. 6g** right).

989 **Statistical analysis.** Measurements of the signal profile (**Figs. 7a,b,e** and



990 **Supplementary Figs. 4a,7b**) and relative fluorescence intensity (**1d,2f,3d,e,5i,6c,f**  
991 and **Supplementary Figs. 1**) were based on previously published methods with  
992 ImageJ<sup>31</sup>. Briefly, the signal profile of each pixel was calculated by subtracting the  
993 total signal value from the mean gray value of the background. We first measured the  
994 total signal value by a straight line drawn across the signal area (somas in the  
995 injection site or long-range axons) followed by measuring the mean gray value of the  
996 background by another straight line drawn across the background area close to the  
997 signal spot. For the measurement of relative fluorescence intensity, a rectangular  
998 selection (white dashed boxes) covering the signal spot (neuronal cell bodies) was  
999 made followed by the recording of the area of the boxes and the integrated density  
1000 (IntDen) of the signal. To calculate the mean background, a straight line (yellow lines)  
1001 was drawn across the background area close to the signal spot, and the mean gray  
1002 value of the background was measured. The relative fluorescence intensity of each  
1003 pixel was calculated by the relative signal values (resulting from subtraction of the  
1004 total signal value from the total gray value of the background) over the pixel number  
1005 of the area.

1006 For comparison of the ratio between the signal intensity of DsRed and EGFP in  
1007 starter cells labeled by IAAV-DIO-GT/RG and sAAV-DIO-GT/RG, a total of 170  
1008 starter neurons were selected randomly from 3 mice for both groups (**Fig. 1c** and  
1009 **Supplementary Fig. 1a**, left panel). For comparisons of the signal intensity of DsRed  
1010 in input cells within the IAAV-DIO-GT/RG- and sAAV-DIO-GT/RG labeling groups  
1011 (**Fig. 2f** and **Supplementary Fig. 1a**, right panel), 160 input neurons for RT, 190  
1012 input neurons for SSp and SSs were selected randomly from 3 independent  
1013 experimental mice for both groups.

1014 For comparisons of the signal intensity of sparsely labeled neurons with non-cell-  
1015 type-specific in wild-type mice (**Fig. 2d,e** and **Supplementary Fig. 1b,c**), 40 neurons  
1016 from 2-5 brain slice of the injection site were selected randomly from three  
1017 independent experimental mice for IAAV<sup>20,000</sup>, IAAV<sup>200,000</sup>, sAAV<sup>20,000</sup>, sAAV<sup>40,000</sup> and  
1018 sAAV<sup>80,000</sup>, and 20 out of 24 neurons were selected from IAAV<sup>1,000,000</sup>, and 17 out of  
1019 26 neurons were selected from sAAV<sup>1,000,000</sup> (the other 9 neurons were hardly captured  
1020 under low imaging parameters). As comparisons, 40 neurons of MOp, CA1 and CA3  
1021 regions were selected randomly from brain slices of Thy1-EYFP-H transgenic mice  
1022 with similar bregma.

1023 For comparisons of the signal intensity of sparsely labeled cell-type-specific

1024 neurons (**Fig. 5i**), 40 neurons from 2-4 brain slices of the injection site were selected  
1025 randomly from three independent cssAAV<sup>20,000</sup>-labeled Thy1-Cre mice, cssAAV<sup>20,000</sup>-  
1026 labeled ChAT-Cre mice and cssAAV<sup>8,000</sup>-labeled DAT-Cre mice.

1027 For comparisons of signal intensity of EYFP and mCherry (**Fig. 7c**), 90 neurons  
1028 from brain slices of the injection site were selected randomly from 3 independent  
1029 experimental mice for the sAAV-EYFP/mCherry, rAAV2/9-EF1 $\alpha$ -EYFP/PBS mixture  
1030 (ratio of 1:1) and rAAV2/9-EF1 $\alpha$ -mCherry/PBS mixture (ratio of 1:1).

1031 Whole-brain counting of input cells was performed following previously  
1032 published methods<sup>32,33</sup>. Briefly, input cells in each coronal section were identified  
1033 manually, followed by registration of each coronal section to the Allen Brain Atlas  
1034 (ABA, <http://mouse.brain-map.org/>). We summed the total number of input neurons  
1035 and calculated the convergent index (ratio between input cells and starter cells)<sup>8</sup> in  
1036 diverse gross regions and subregions. For the demonstration of relationship between  
1037 proportion of inputs and enhanced ratios of tracing efficiency provided by MAP-  
1038 ENVIVIDERS (**Fig. 2e**), we calculated selected 44 representative subregions from 11  
1039 major regions from sAAV-DIO-GT/RG labeling groups and calculated proportion of  
1040 inputs, i.e. inputs in these subregions against total inputs (for better demonstration,  
1041 proportion of inputs in x-axis were listed by logarithm to base 10, denoted by lg %).  
1042 Enhanced ratios of tracing efficiency provided by MAP-ENVIVIDERS (y-axis) were  
1043 denoted by convergent index of lAAV-DIO-GT/RG dividing by convergent index of  
1044 sAAV-DIO-GT/RG in diverse subregions.

1045 All quantitative data, including cell numbers and measurement of relative signal  
1046 intensity, convergent index and proportion of inputs, were all presented as the mean  $\pm$   
1047 s.e.m. Significance was analyzed using one-way ANOVA with Dunnett's post hoc test  
1048 (**Fig. 3d**), Turkey's post hoc test (**Fig. 5i**), Student's t-test (**Figs. 1d,2f,3e,7c,f**) and  
1049 Mann-Whitney U test (**Figs. 2a-d** and **Supplementary Fig. 4**) in GraphPad Prism  
1050 version 6.0 (GraphPad Software Inc., San Diego, CA, USA).

1051

1052

1053

1054

1055

1056

## Supplementary Information

1057 **Supplementary Figure 1**

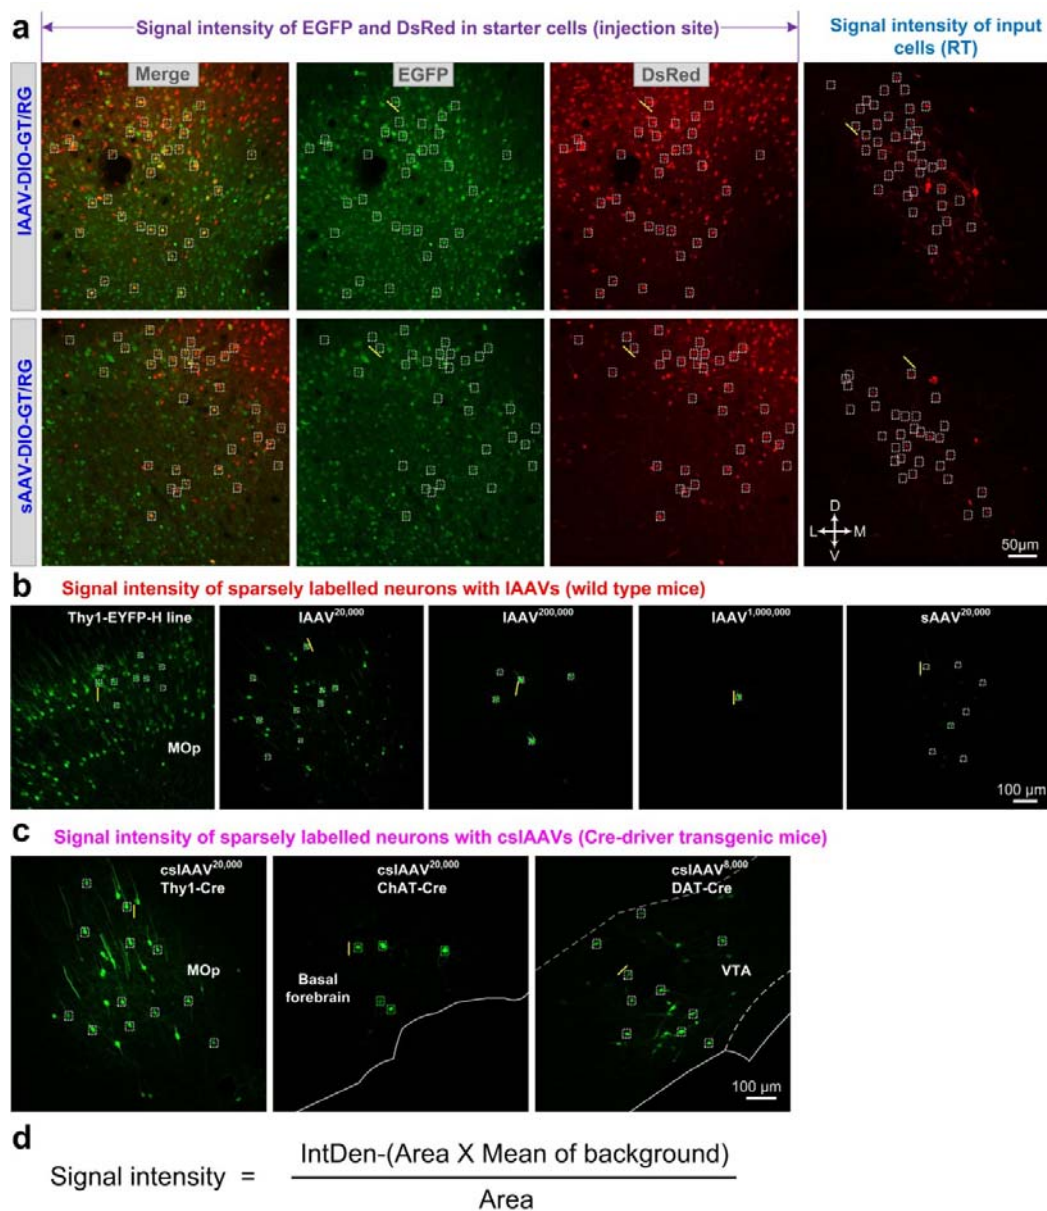

1058

1059 **Supplementary figure 1**

1060 **Schematic of measuring fluorescence intensity of individual neurons.**

1061 (a) Representative confocal images showing the measurement of signal intensity of  
1062 EGFP and DsRed in starter cells and DsRed-labeled input cells in IAAV-DIO-  
1063 GT/RG- and sAAV-DIO-GT/RG-treated mice. All of the images were obtained under  
1064 the same imaging conditions (low laser intensity was used to avoid over-exposure of  
1065 the cell bodies).

1066 **(b)** Representative confocal images showing the measurement of signal intensity of  
1067 neurons in Thy1-EYFP-H line transgenic mice and sparsely labeled neurons with  
1068 diverse IAAVs and sAAVs in MOp region.

1069 **(c)** Representative confocal images showing the measurement of signal intensity of  
1070 neurons in cssAAV<sup>20,000</sup>-labeled Thy1-Cre mice (MOp), cssAAV<sup>20,000</sup>-labeled ChAT-  
1071 Cre mice (basal forebrain) and cssAAV<sup>8,000</sup>-labeled DAT-Cre mice (VTA).

1072 **(d)** The signal intensities were calculated in ImageJ according to the formula in **d** and  
1073 the method in the previous report<sup>31</sup>. Briefly, a rectangular selection (white dashed  
1074 boxes) covering the signal spot (neuronal cell bodies) was made, and then the area of  
1075 the boxes and the integrated density (IntDen) of the signal were recorded. To calculate  
1076 the mean background, a straight line (yellow lines) was drawn across the background  
1077 area close to the signal spot and the mean gray value of the background was measured.  
1078 This method was applied to calculate the signal intensities in **Figs 1d,2d,3d,e,5j,7c**.

1079 Abbreviations: MOp, primary motor area; RT, reticular nucleus of the thalamus; VTA,  
1080 ventral tegmental area.

1081

1082

1083

1084

1085

1086

1087

1088

1089

1090

1091

1092

1093

1094

1095



1096 **Supplementary Figure 2**

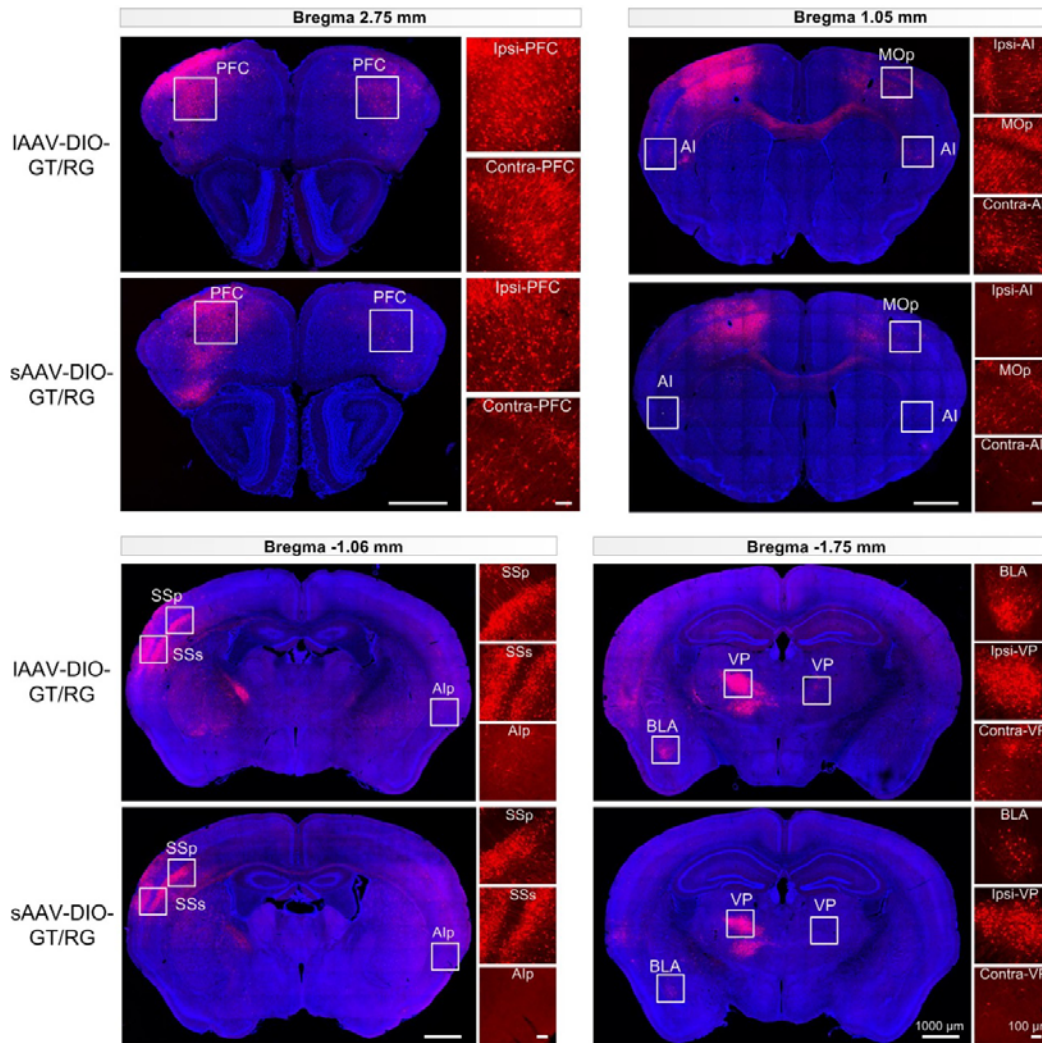

1097

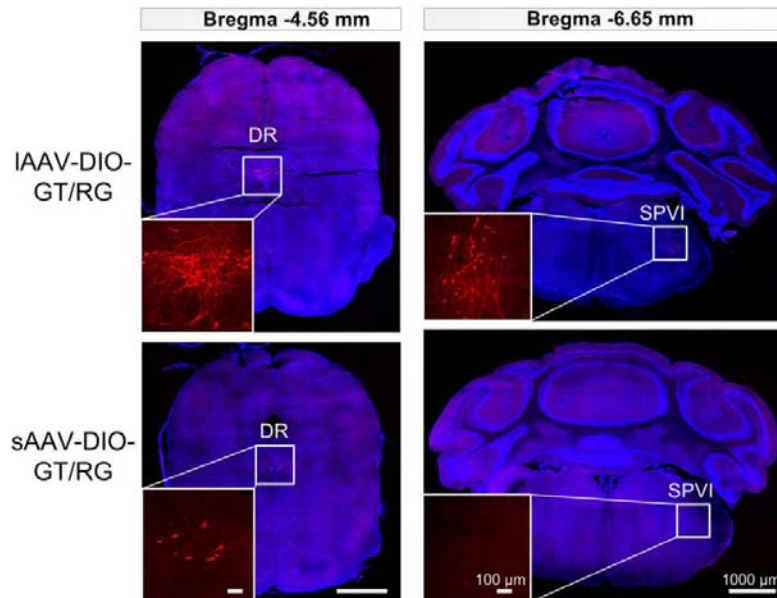

1098

1099 **Supplementary figure 2**

1100 **Localization of nuclei demonstrated in Fig. 6e with the aid of DAPI (4',6-**  
1101 **diamidino-2-phenylindole) staining.**

1102 Abbreviations: AI, agranular insular area; AIp; agranular insular area, posterior part;  
1103 BLA, basolateral amygdalar nucleus; DR, dorsal nucleus raphe; MOp, primary motor  
1104 area; PFC, prefrontal cortex; SPVI, spinal nucleus of the trigeminal, interpolar part;  
1105 SSp, primary somatosensory area; SSs, supplemental somatosensory area; VAL,  
1106 ventral anterior-lateral complex of the thalamus; VP, ventral posterior complex of the  
1107 thalamus.

1108

1109

1110

1111

1112

1113

1114

1115

1116

1117

1118

1119

1120

1121

1122

1123

1124

1125

1126

1127 **Supplementary Figure 3**

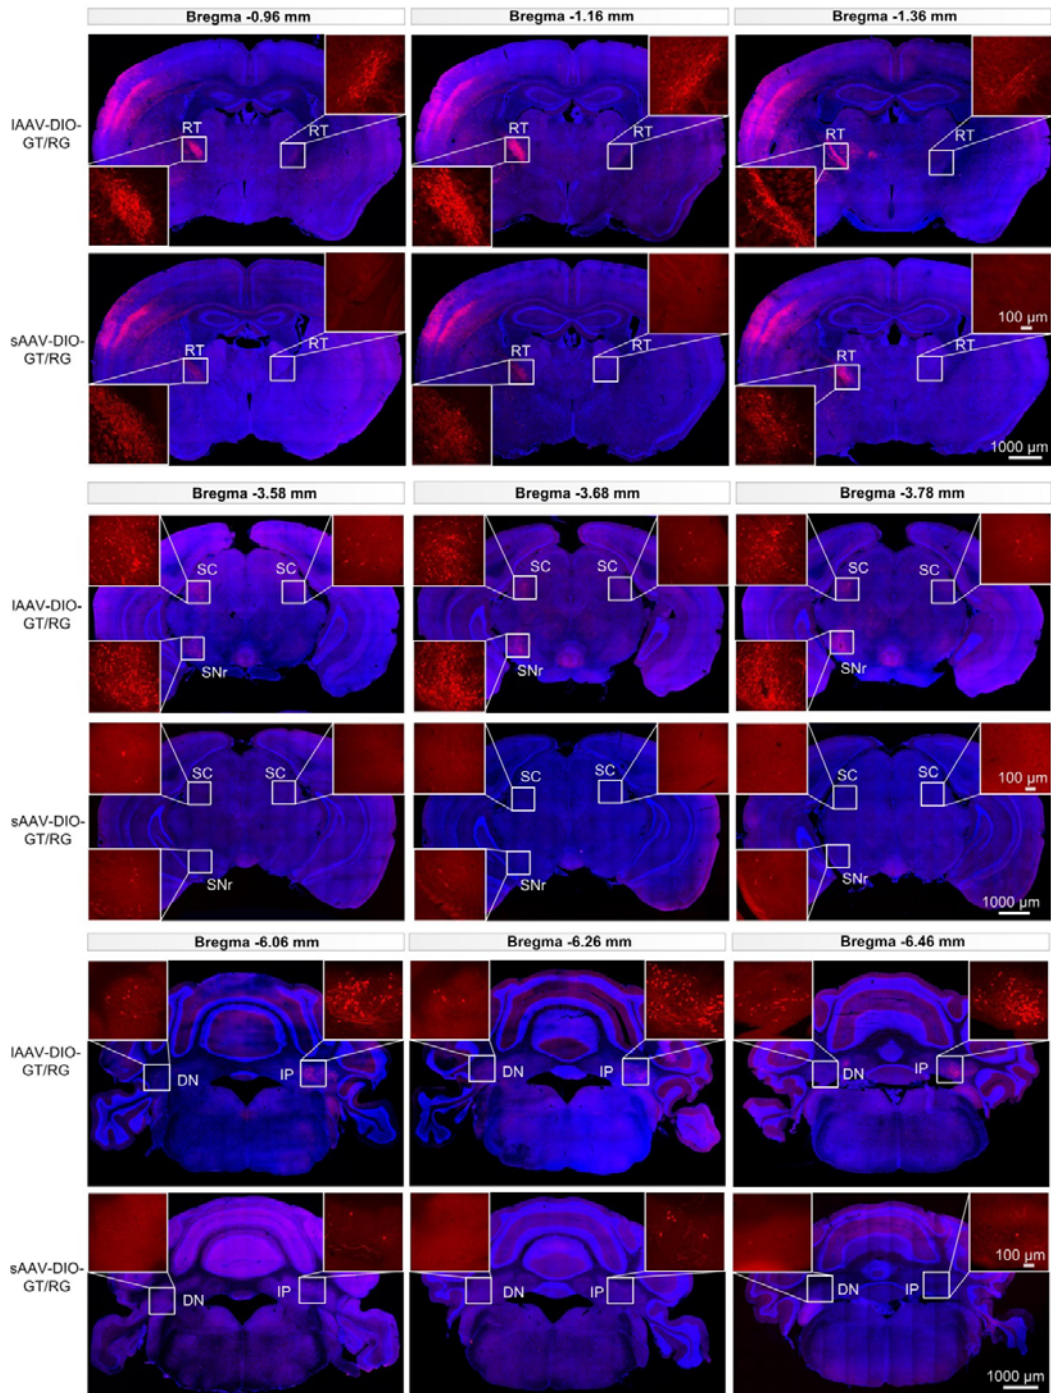

1128

1129 **Supplementary figure 3**

1130 **Comparisons of inputs in RT of thalamus, SC and SNr of midbrain, DN and IP**  
1131 **of cerebellum between IAAV-DIO-GT/RG and sAAV-DIO-GT/RG labeling**  
1132 **groups. Insets were enlargements respective brain regions. DN, dentate nucleus; IP,**



1133 interpeduncular nucleus; RT, reticular nucleus of the thalamus; SC, superior colliculus;  
 1134 SNr, substantia nigra pars reticulata.

1135 **Supplementary Figure 4**

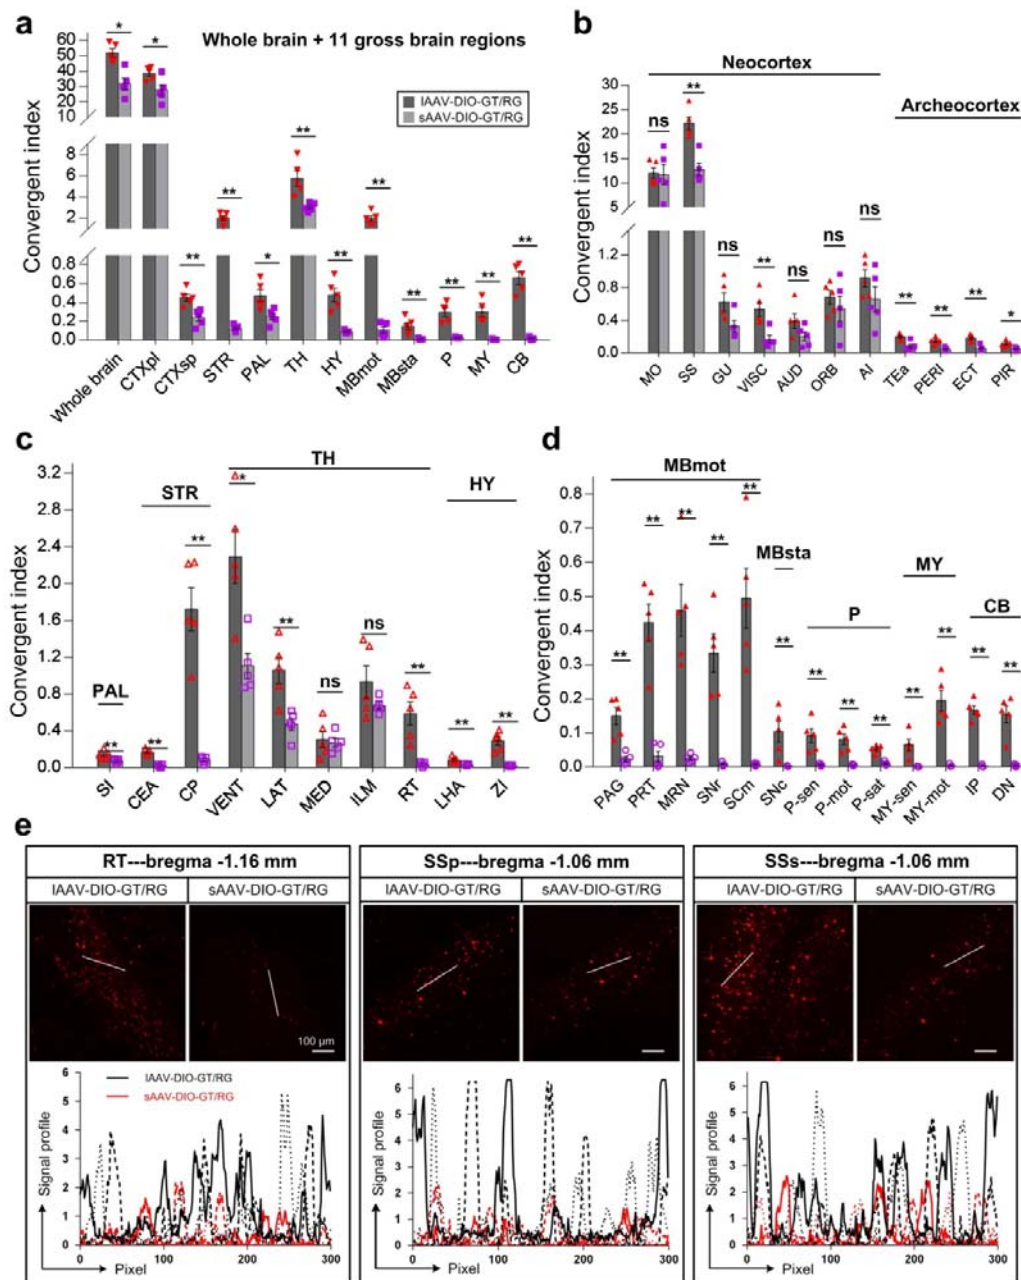

1136

1137

1138

1139

1140

1141 **Supplementary figure 4**

1142 **(a-d) Brain-wide comparisons of tracing efficiency between IAAV-DIO-GT/RG**  
1143 **and sAAV-DIO-GT/RG labeling groups.**

1144 **(a)** Comparisons of convergent index of total inputs and 11 gross brain regions.

1145 **(b)** Comparisons of convergent index in diverse cortical regions.

1146 **(c)** Comparisons of convergent index in pallidum (PAL), striatum (STR), thalamus  
1147 (TH) and hypothalamus (HY).

1148 **(d)** Comparisons of convergent index in midbrain, motor related (MBmot), midbrain,  
1149 behavioral state related (MBsta), pons (P), medulla (MY) and cerebellum (CB).

1150 All data are presented as mean  $\pm$  s.e.m. n = 5 mice for each group in **a-d**. Mann-  
1151 Whitney U test. n.s, non-significant ( $P > 0.05$ ), \* $P < 0.05$ , \*\* $P < 0.01$ .

1152 **(e)** Signal profile of input neurons in RT, SS<sub>p</sub> and SS<sub>s</sub> in IAAV-DIO-GT/RG and  
1153 sAAV-DIO-GT/RG labeling groups. n = 3 mice for each group.

1154 Abbreviations see **Supplementary Table 2**.

1155

1156

1157

1158

1159

1160

1161

1162

1163

1164

1165

1166

1167

1168

1169 **Supplementary Figure 5**

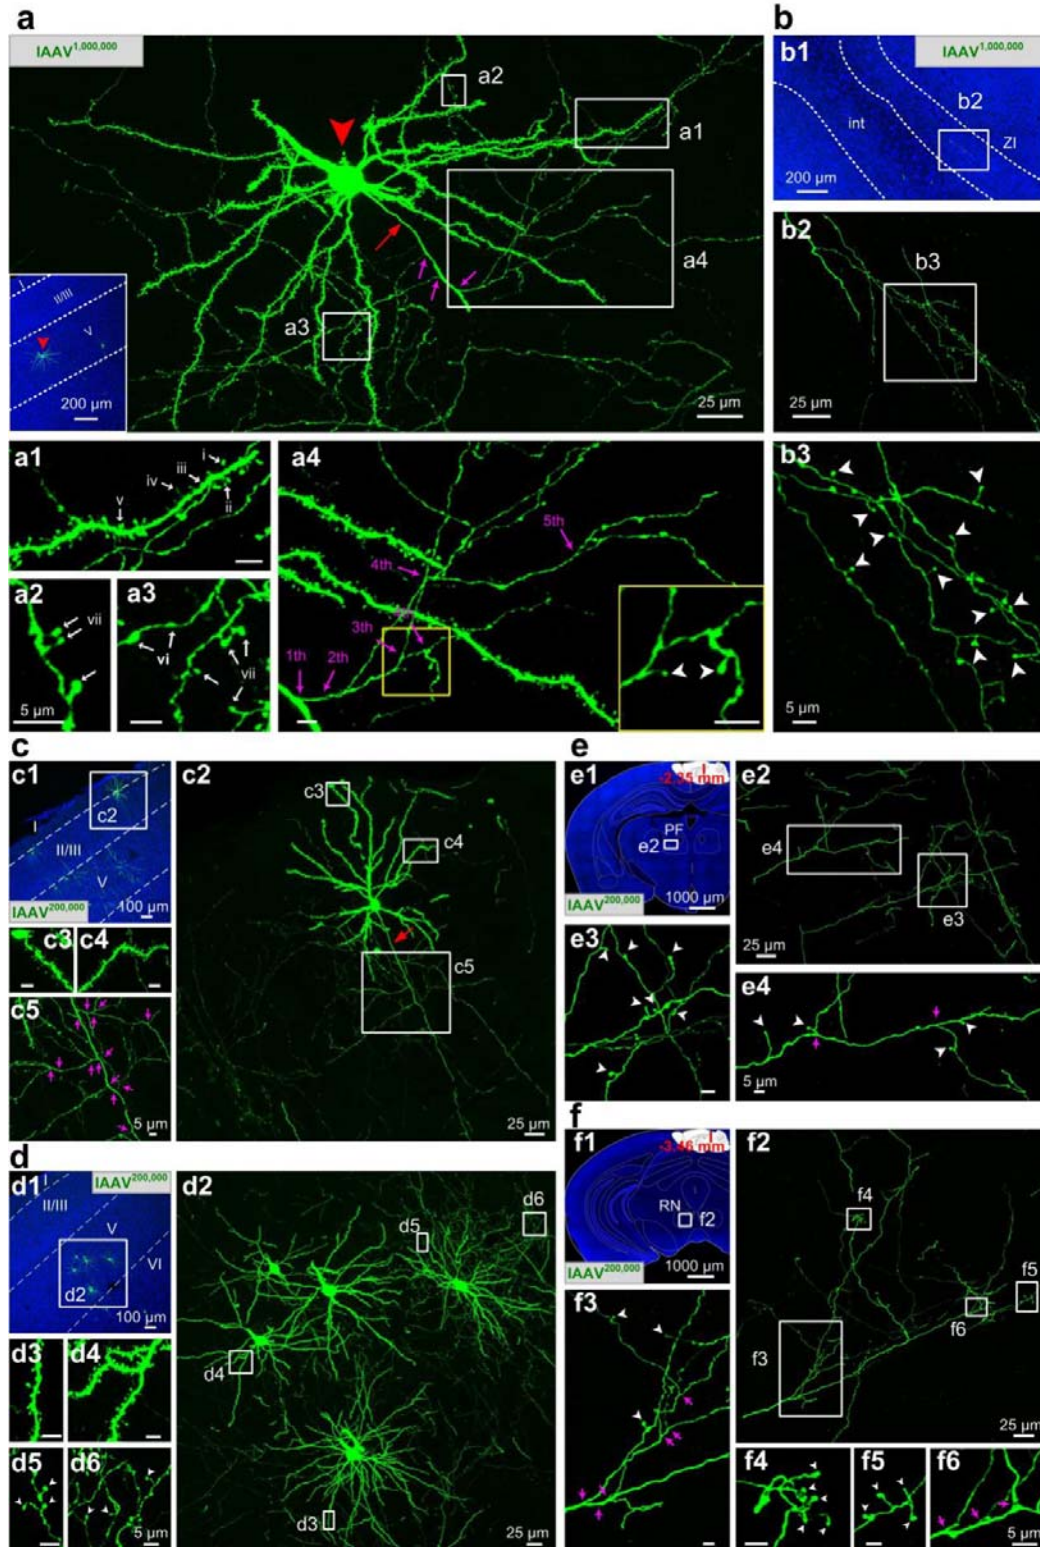

1170

1171

1172

1173 **Supplementary figure 5**

1174 **Fine structures of individual neurons labeled with IAAV<sup>1,000,000</sup> and IAAV<sup>200,000</sup>.**

1175 **(a)** Confocal image (100- $\mu$ m thickness) of a representative individual neuron labeled  
1176 with IAAV<sup>1,000,000</sup> in injection site. Inset showed the localization of cell body  
1177 (indicated by red arrowhead). **(a1)** Five types of spines: (i) mushroom, (ii) thin, (iii)  
1178 stubby, (iv) filopodium, and (v) branched spines. **(a2-a3)** Two types of boutons: (vi)  
1179 en passant boutons and (vii) terminal boutons. **(a4)** Different levels of local axonal  
1180 collaterals.

1181 **(b)** Confocal images of representative long-range axonal projections in the ZI region  
1182 **(b1)** labeled with IAAV<sup>1,000,000</sup>. Fine structures were progressively enlarged from **b1** to  
1183 **b3**.

1184 **(c-d)** Fine structures of MOp L2 **(c)** and L5 **(d)** pyramidal neurons labeled with  
1185 IAAV<sup>200,000</sup> in injection site. **c1** and **d1** were low-magnification images indicating the  
1186 locations of cell bodies. **c2** and **d2** were high-magnification images showing the fine  
1187 structures of the representative neurons. **c3-c5** and **d3-d6** were enlargements of box  
1188 regions in **c2** and **d2**, respectively.

1189 **(e-f)** Fine structures of MOp long-range axonal projections labeled with IAAV<sup>200,000</sup>.  
1190 **e1** and **f1** were composite coronal sections indicated the locations of the axonal  
1191 projections, including parafascicular nucleus (PF, **e1**) in thalamus and red nucleus  
1192 (RN, **f1**) in midbrain. **e2** and **f2** were high-magnification images showing the fine  
1193 structures of the complex axonal arborizations. **e3-e4** and **f3-f6** were enlargements of  
1194 the boxed regions in **e2** and **f2**, respectively. Red arrows indicated the primary axon  
1195 emitting from soma. The pink arrows and numerals indicate the orders of the axonal  
1196 branches and bright, large bulb-shaped terminal boutons were indicated by white  
1197 arrowheads.

1198 Definition the boundary of cortical layers (indicated by white dashed lines) and  
1199 location of nuclei were all based on DAPI (4',6-diamidino-2-phenylindole, blue)  
staining. int, internal capsule; ZI, zona incerta. I-VI, cortical layers I to VI.

1200



1201 **Supplementary Figure 6**

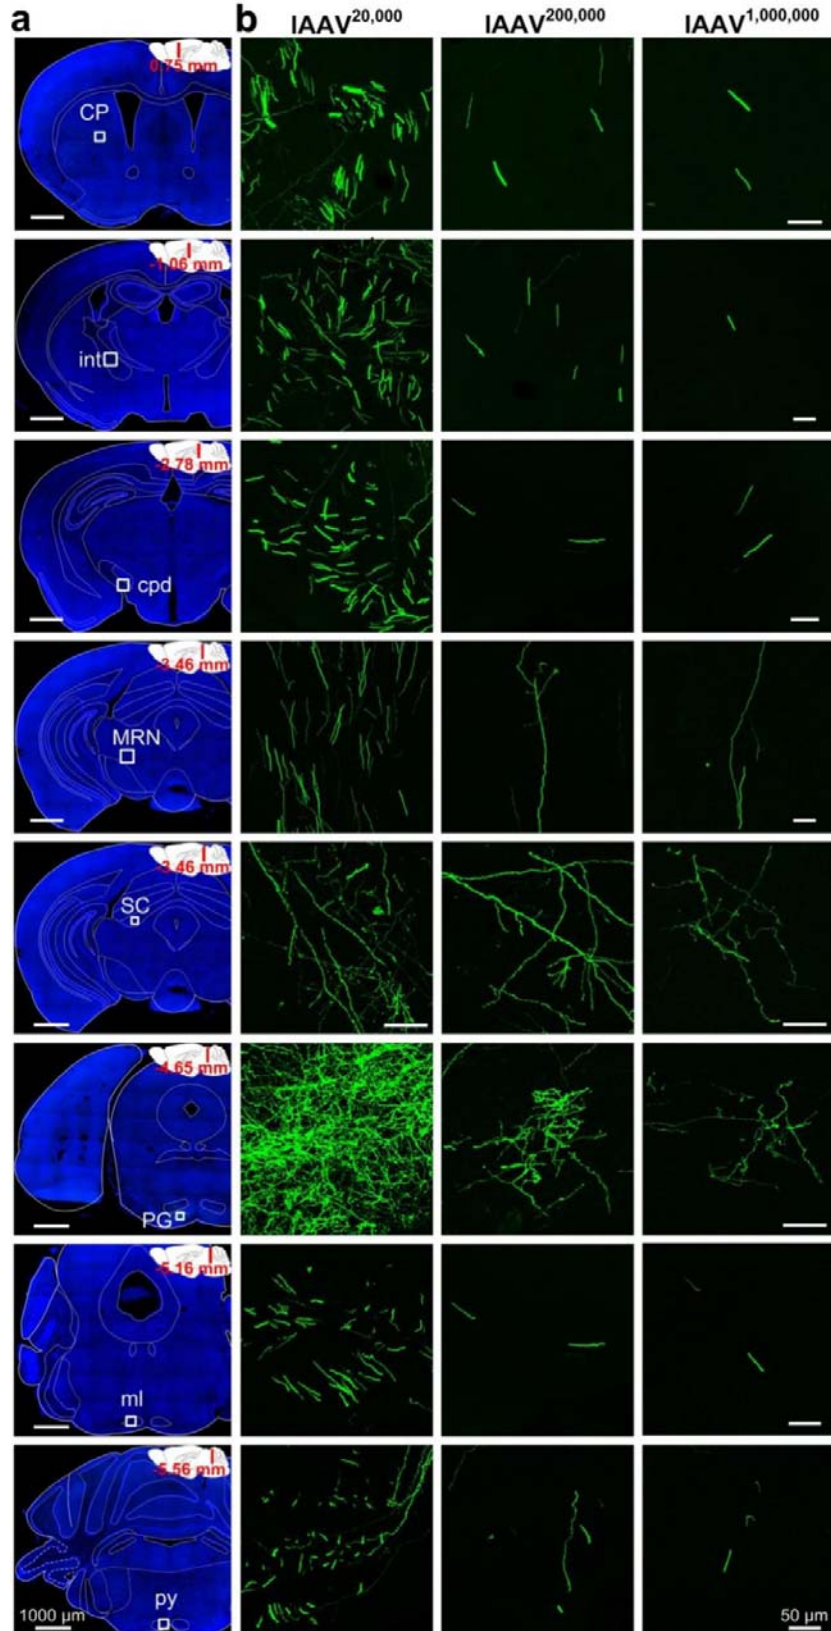



1203 **Supplementary figure 6**

1204 **Brain-wide long-range axonal projections of three IAAVs in MOp.**

1205 We injected equal volume (100 nl) of three IAAVs (IAAV<sup>20,000</sup>, IAAV<sup>200,000</sup> and  
1206 IAAV<sup>1,000,000</sup>) into MOp of wild-type mice. After 21d's expression, we examined  
1207 brain-wide long-range axonal projections of three IAAVs, including CP (bregma level:  
1208 0.75 mm), int (bregma level: -1.06 mm), cpd (bregma level: -2.78 mm), MRN and SC  
1209 (bregma level: -3.46 mm), PG (bregma level: -4.65 mm), ml (bregma level: -5.16  
1210 mm), and py (bregma level: -5.56 mm).

1211 **(a)** Composite coronal sections showing the locations of the axonal projections.

1212 **(b)** Maximum-intensity projections of the boxed regions in **a**, showing the fine  
1213 structures of the axonal projections in different brain regions. Images coming from the  
1214 same brain region were obtained with the same imaging conditions and processed  
1215 identically.

1216 Abbreviations: CP, caudoputamen; int, internal capsule; cpd, cerebal peduncle; ml,  
1217 medial lemniscus; MRN, midbrain reticular nucleus; PG, pontine gray; py, pyramid;  
1218 SC, superior colliculus.

1219

1220

1221

1222

1223

1224

1225

1226

1227

1228

1229

1230

1231

1232

1233

1234

1235 **Supplementary Figure 7**

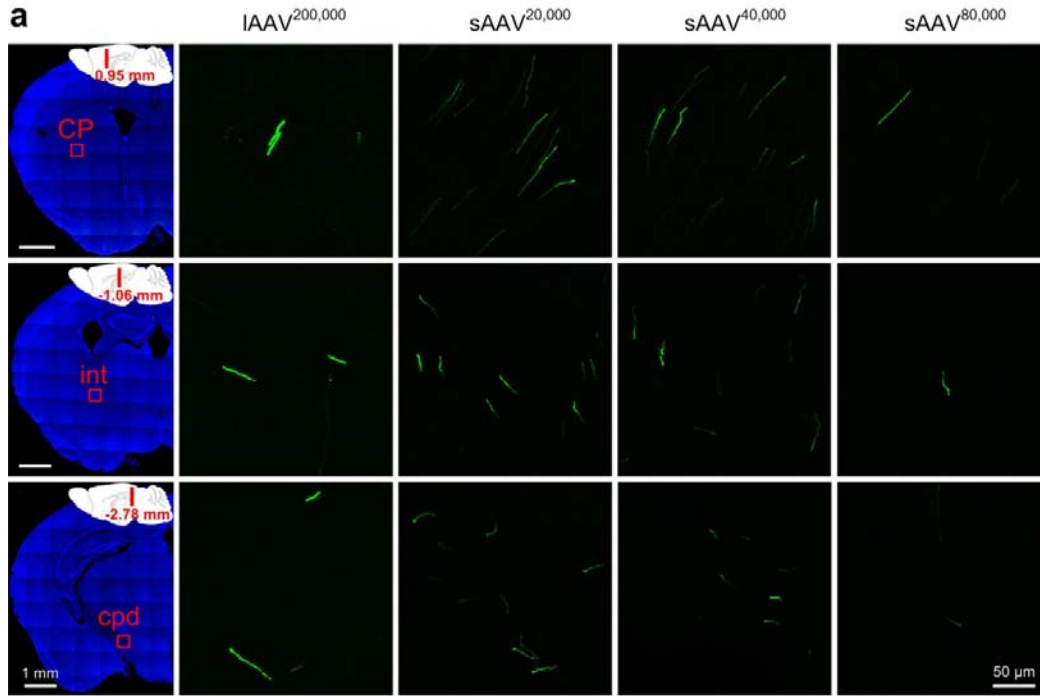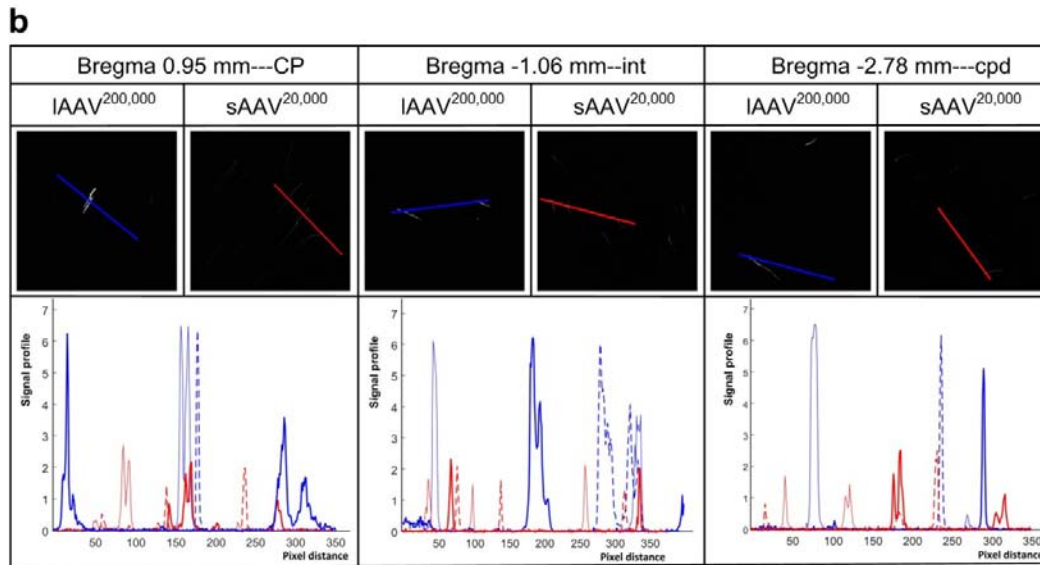

1236

1237

1238

1239

1240

1241

1242 **Supplementary figure 7**

1243 **Comparisons of brightness of long-range axonal projections between IAAV<sup>200,000</sup>**  
1244 **and diverse sAAVs (sAAV<sup>20,000</sup>, sAAV<sup>40,000</sup> and sAAV<sup>80,000</sup>).**

1245 **(a)** Representative confocal images of long-range axonal projections in different brain  
1246 regions. All images in each brain region were obtained under the same imaging  
1247 conditions and processed identically.

1248 **(b)** Measurements of fluorescence intensities in **a** for IAAV<sup>200,000</sup> (indicated by blue  
1249 lines, three types of blue lines represent three different mice) and sAAV<sup>20,000</sup>  
1250 (indicated by red lines, three types of red lines represent three different mice). The  
1251 data showed that the fluorescence in neurons labeled by IAAVs was stronger than by  
1252 sAAVs.

1253

1254 **Supplementary Figure 8**

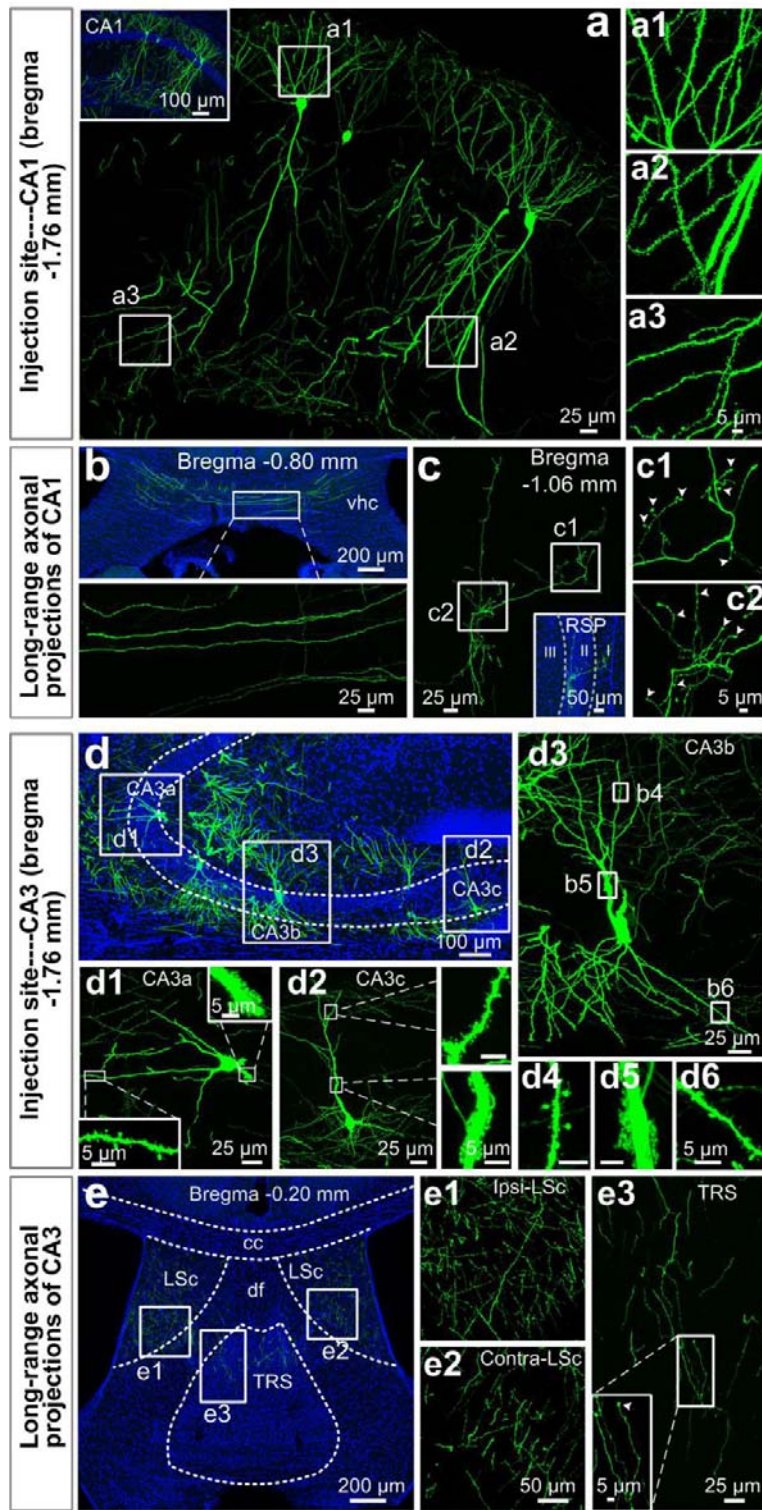

1255

1256

1257

1258 **Supplementary figure 8**

1259 **Applications of IAAV<sup>200,000</sup> in CA1 and CA3 region.**

1260 **(a-c)** Applications of IAAV<sup>200,000</sup> in CA1 region.

1261 **(a)** Representative confocal images showing the fine structures of labeled neurons in  
1262 injection site of CA1. Inset shows the locations of the somata.

1263 **(a1-a3)** Enlargements of the boxed regions in **a** showing different parts of dendritic  
1264 spines.

1265 **(b-c)** Representative confocal images of the long-range axonal projections of CA1 in  
1266 ventral hippocampal commissure (vhc, **b**) and retrosplenial cortex (RSP, **c**). **c1-c2**  
1267 were enlargements of the corresponding boxed regions in **c**. Insets in **c** were  
1268 approximate location of the axonal arborizations. White arrowheads indicate terminal  
1269 boutons. White dashed lines on inset define the boundary of cortical layers based on  
1270 DAPI staining.

1271 **(d-e)** Applications of IAAV<sup>200,000</sup> in CA3 region.

1272 **(d)** Low-magnification images showing the overall labeling in CA3.

1273 **(d1-d3)** Fine structures of the CA3a (**d1**), CA3b (**d3**), and CA3c (**d2**) pyramidal  
1274 neurons. Respective box regions in **d1** and **d2** were enlarged to show proximal and  
1275 distal dendritic spines.

1276 **(d4-d6)** Enlargements of the box regions in (**d3**) showing apical (**d4**), proximal (**d5**),  
1277 and basal dendritic spines (**d6**) of CA3b pyramidal neuron, respectively.

1278 **(e)** Low-magnification images indicate the locations of the axonal projections in TRS  
1279 and LSc. The location of nuclei was based on Paxinos Mouse Brain Atlas (PMBA)  
1280 with the aid of DAPI staining. **(e1-e3)** High-magnification images of the boxed  
1281 regions in **e** showing the fine structures of axonal projections and axonal terminals.

1282 Abbreviations: CA1, field CA1 of hippocampus; CA3, field CA3 of hippocampus; cc:  
1283 corpus callosum; df: dorsal fornix; DG, dentate gyrus; LSc: lateral septal nucleus,  
1284 caudal (caudodorsal) part; TRS: triangular nucleus of septum.

1285

1286

1287

1288

1289

1290



1291 **Supplementary Figure 9**

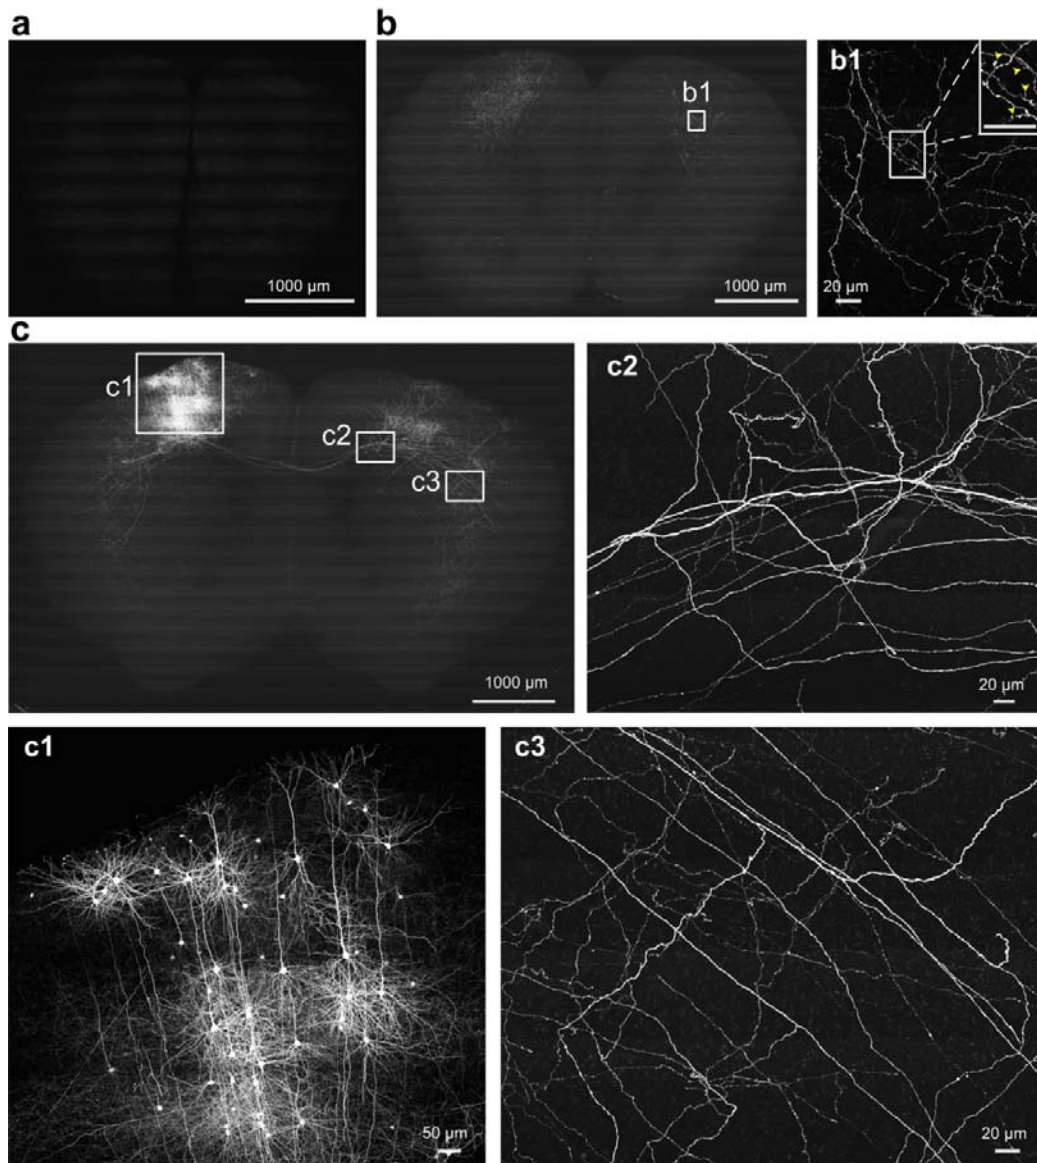

1292  
1293

1294 **Supplementary Figure 9** (continued):

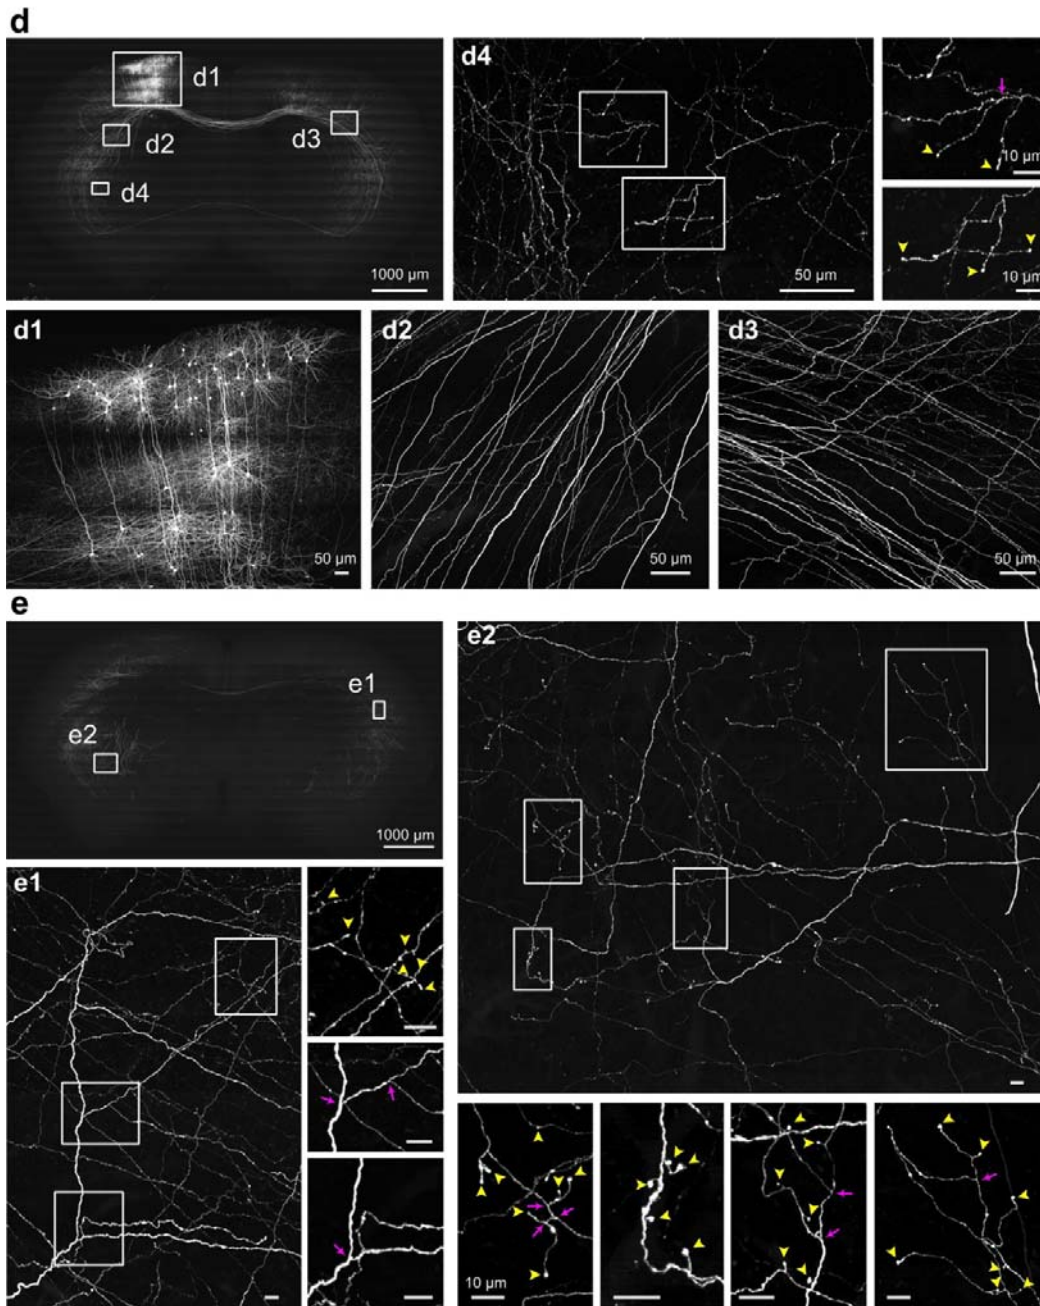

1295

1296

1297 **Supplementary Figure 9** (continued):

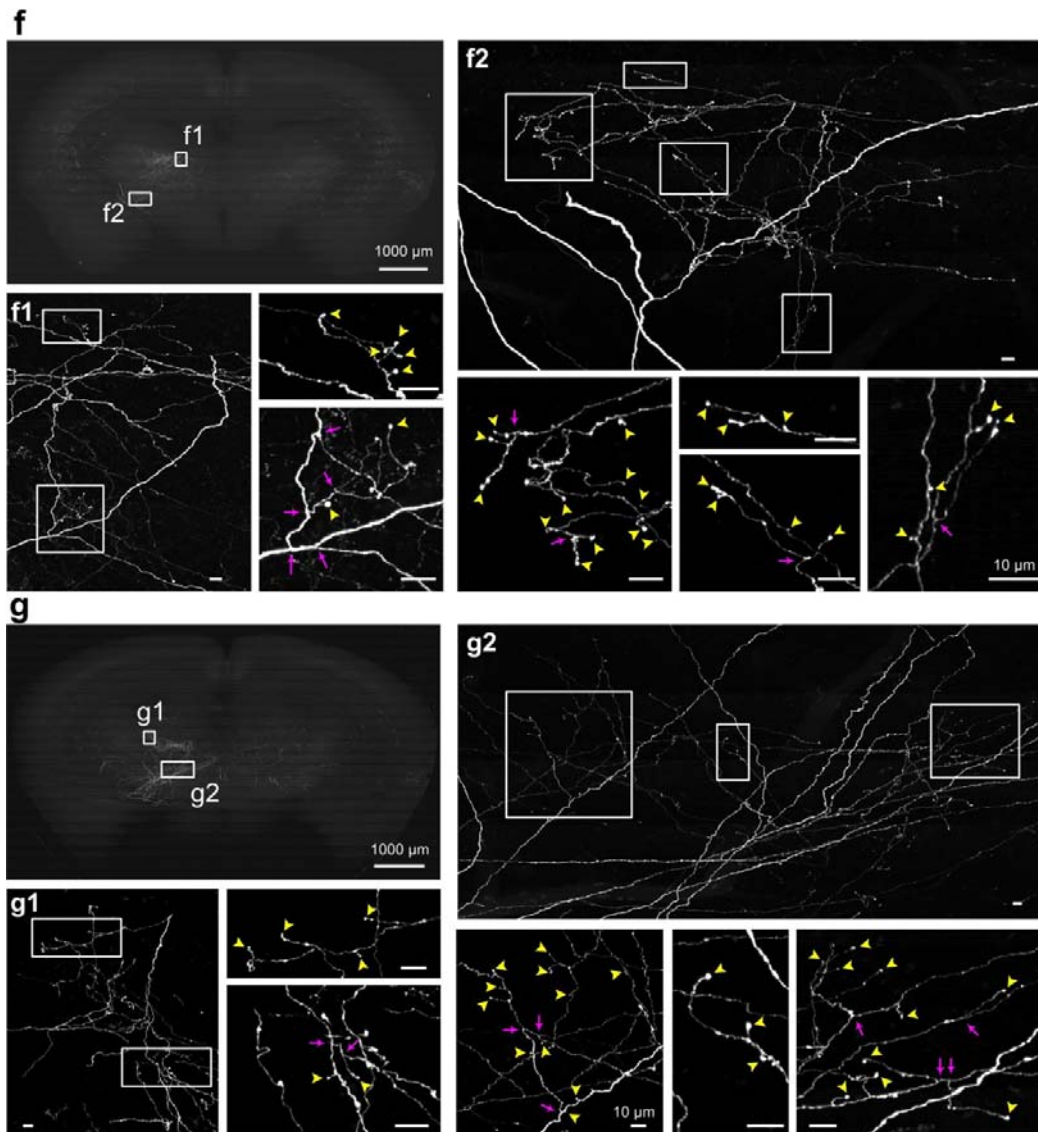

1298

1299

1300 **Supplementary Figure 9** (continued):

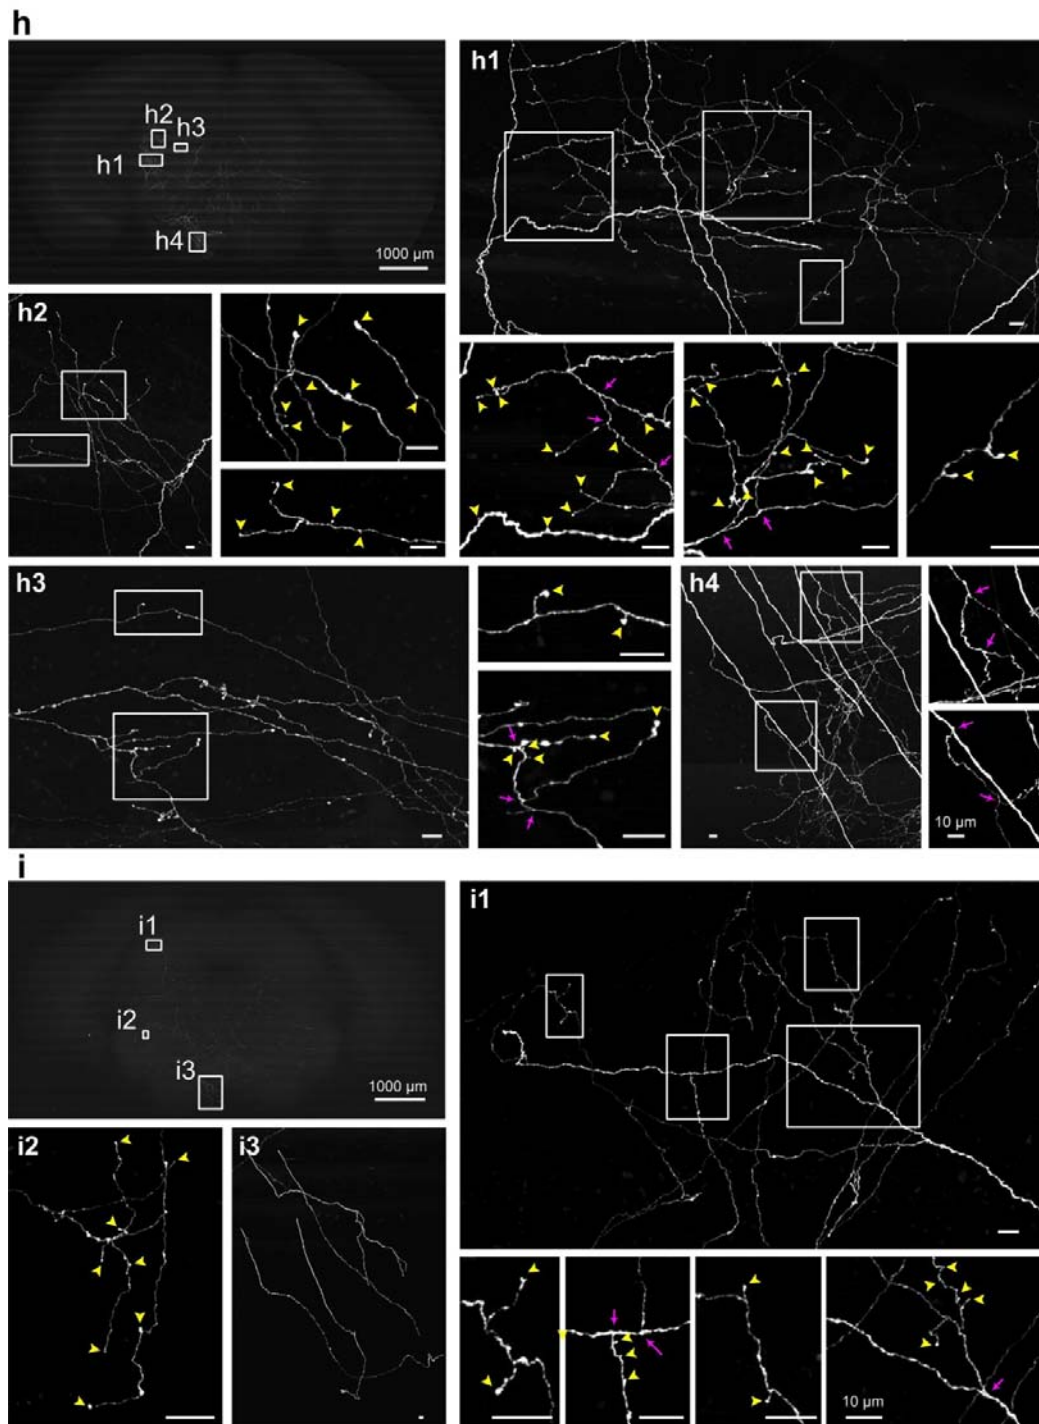

1301

1302

1303

1304



1305 **Supplementary Figure 9** (continued):

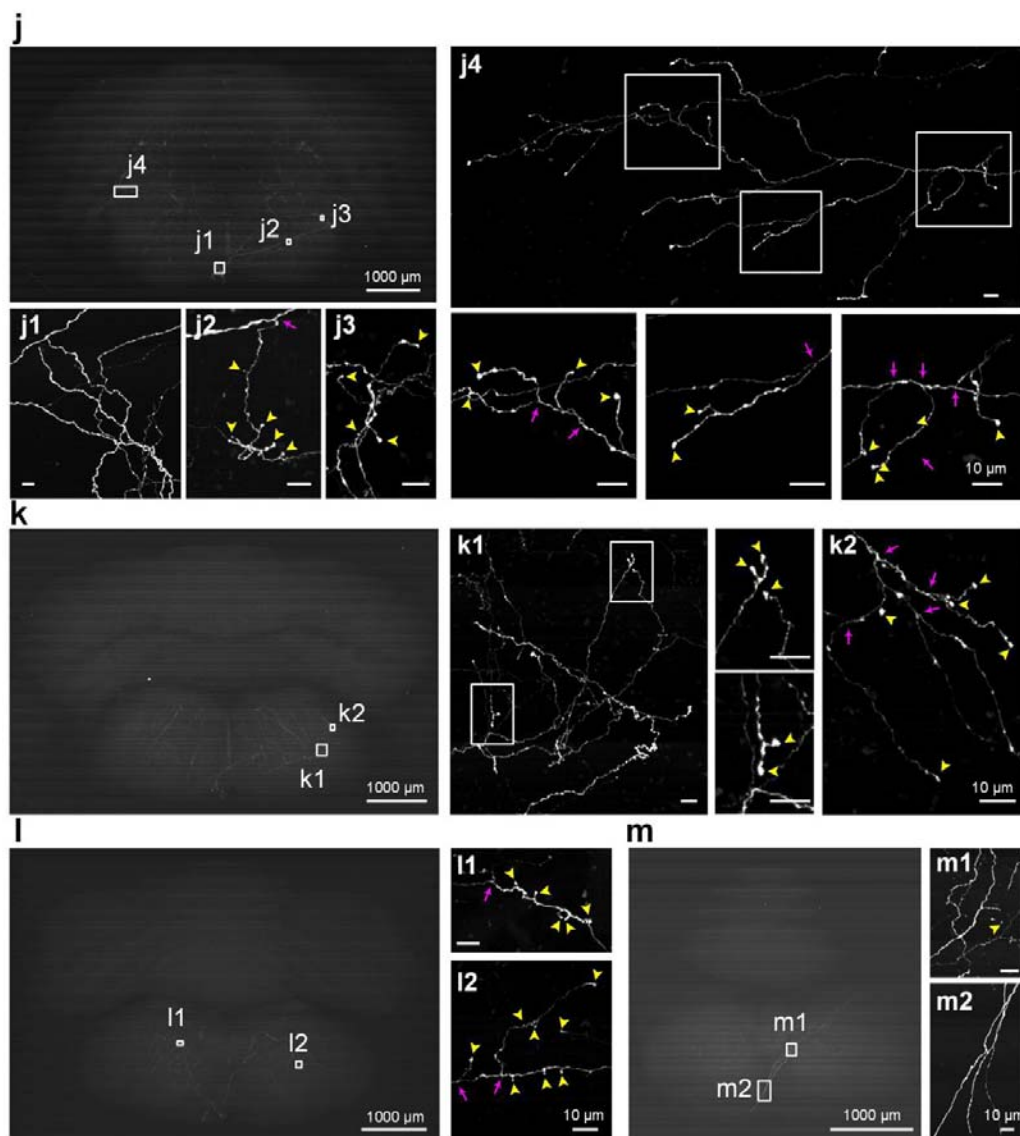

1306

1307 **Supplementary figure 9**

1308 **Whole-brain data sets of MOp (labeled with IAAV<sup>200,000</sup>).**

1309 **a** and **b** were maximum-intensity projections of 800 and 1,600 coronal sections. **c-l**  
1310 were maximum-intensity projections of 1000 coronal sections and **m** was maximum-  
1311 intensity projections of 420 coronal sections, respectively. All other images were  
1312 enlargements of respective box regions showing the injection site or fine structures,  
1313 including axonal branches (indicated by purple arrows) and terminal boutons  
1314 (indicated by yellow arrowheads).

1315

1316



1317 **Supplementary Figure 10**

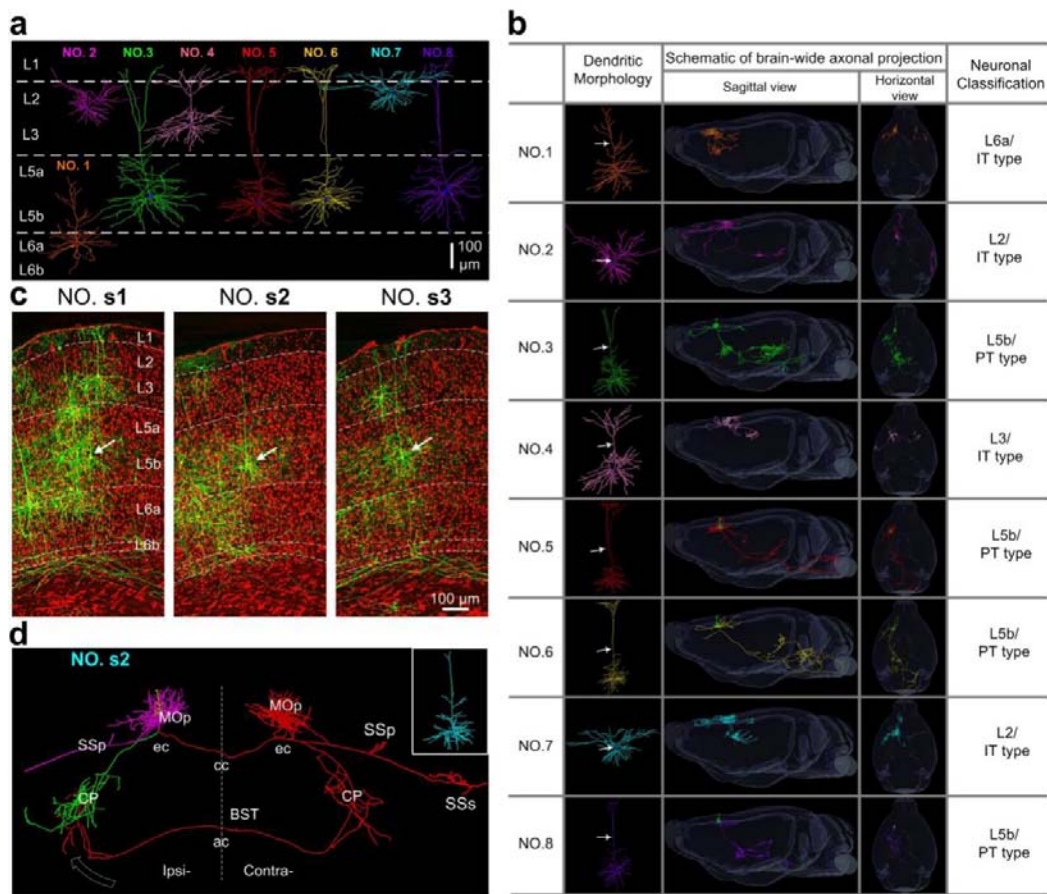

1318

1319 **Supplementary figure 10**

1320 **Localization, dendritic and axonal morphologies of the reconstructed MOP**  
 1321 **pyramidal neurons.**

1322 (a) Gallery of dendritic morphologies and approximate laminar distributions of eight  
 1323 reconstructed pyramidal neurons (No.1-8).

1324 (b) Gallery of Axonal morphologies and probable classifications of 8 neurons. White  
 1325 arrows indicate apical dendrites.

1326 (c) Composite coronal sections show the locations of the cell body of neurons **s1-s3**,  
 1327 which were indicated by white arrows (EYFP signals were in green with 100- $\mu$ m  
 1328 thickness and cytoarchitectonic reference, i.e. propidium iodide (PI) signals were in  
 1329 red with 10- $\mu$ m thickness). White dashed lines define boundary of cortical layers.

1330 (d) Localization of the brain-wide axonal projections of neurons **s2** (dendrites: yellow;  
 1331 local axons: magnet; left branches and right branches originated from ipsilateral  
 1332 external capsule were in green and red color, respectively). The brain regions were

1333 defined according to the Allen Brain Atlas (ABA) with the aid of the PI signals.  
1334 Dashed white arrows pointed terminated directions of main axons.

### 1335 **Supplementary Figure 11**

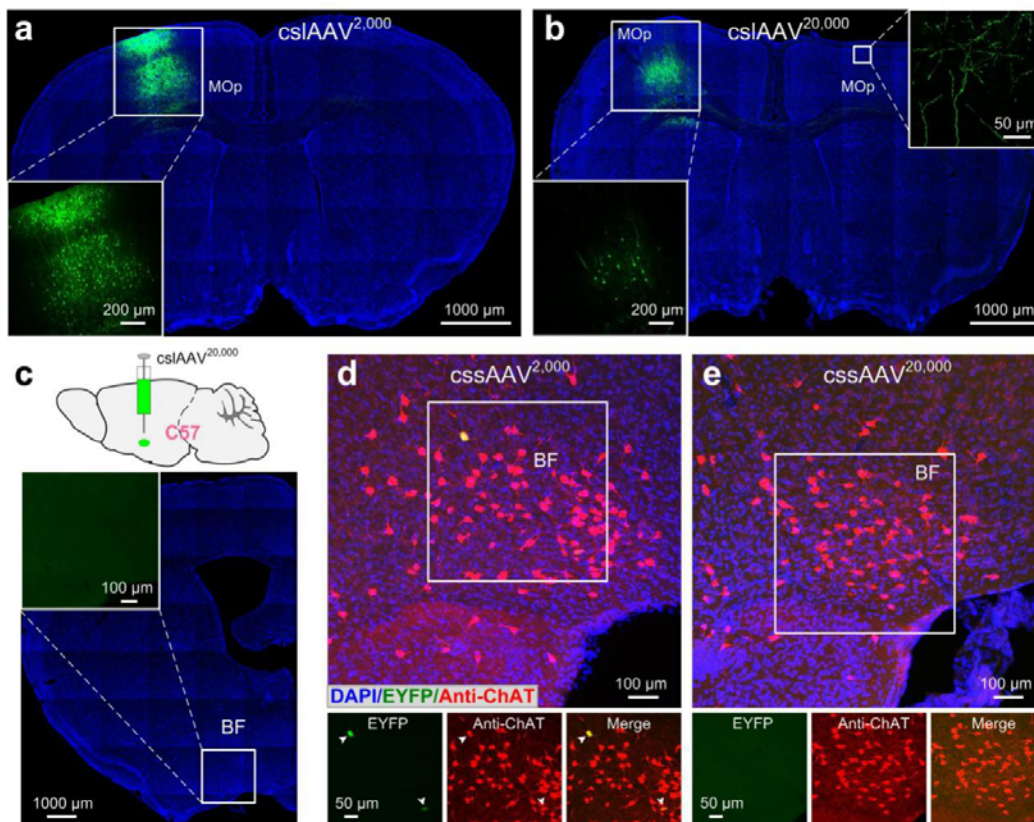

1336

### 1337 **Supplementary figure 11**

1338 **Validation of cell-type-specific labeling strategy with csIAAVs in Thy1-Cre and**  
1339 **ChAT-Cre transgenic mice.**

1340 **(a-b)** Two versions of csIAAVs, csIAAV<sup>2,000</sup> **(a)** or csIAAV<sup>20,000</sup> **(b)** were injected into  
1341 MOp of Thy1-Cre transgenic mice to achieve tunable neuron labeling. Lower left  
1342 insets in **a** and **b** were enlargements of the corresponding boxes showing labeling in  
1343 injection sites. Upper right inset in **b** was contralateral MOp axonal projections.

1344 **(c)** 100nl csIAAV<sup>20,000</sup> was injected into basal forebrain (BF) of wild-type mice, we  
1345 found no neurons were labeled across the injection site of 4 injected mice 21d later,  
1346 indicating that the expression of csIAAVs was strictly restricted to Cre-driver lines.

1347 **(d-e)** For control experiments, we injected 100 nl two diluted ratios of Flp-expressing  
1348 rAAV: Flp- and Cre-dependent rAAVs mixtures (abbreviated for cSSAAV<sup>2,000</sup> and  
1349 cSSAAV<sup>20,000</sup> hereafter, in which the Flp-expressing rAAV was diluted to ratios of  
1350 1:2,000 and 1:20,000 in PBS respectively before equally mixed with Flp- and Cre-  
1351 dependent rAAV into BF of ChAT-Cre transgenic mice (n = 5 mice each). We found

1352 no labeled neurons were detectable in  $cssAAV^{20,000}$ -treated mice and in  $cssAAV^{2,000}$ -  
1353 treated mice, only two mice each contained three or four faintly labeled cholinergic  
1354 neurons (note that the imaging parameters of EYFP were much higher than **Fig. 3c**)  
1355 whereas the other three mice rarely contained any signals in injection sites.

1356

1357 **Supplementary Figure 12**

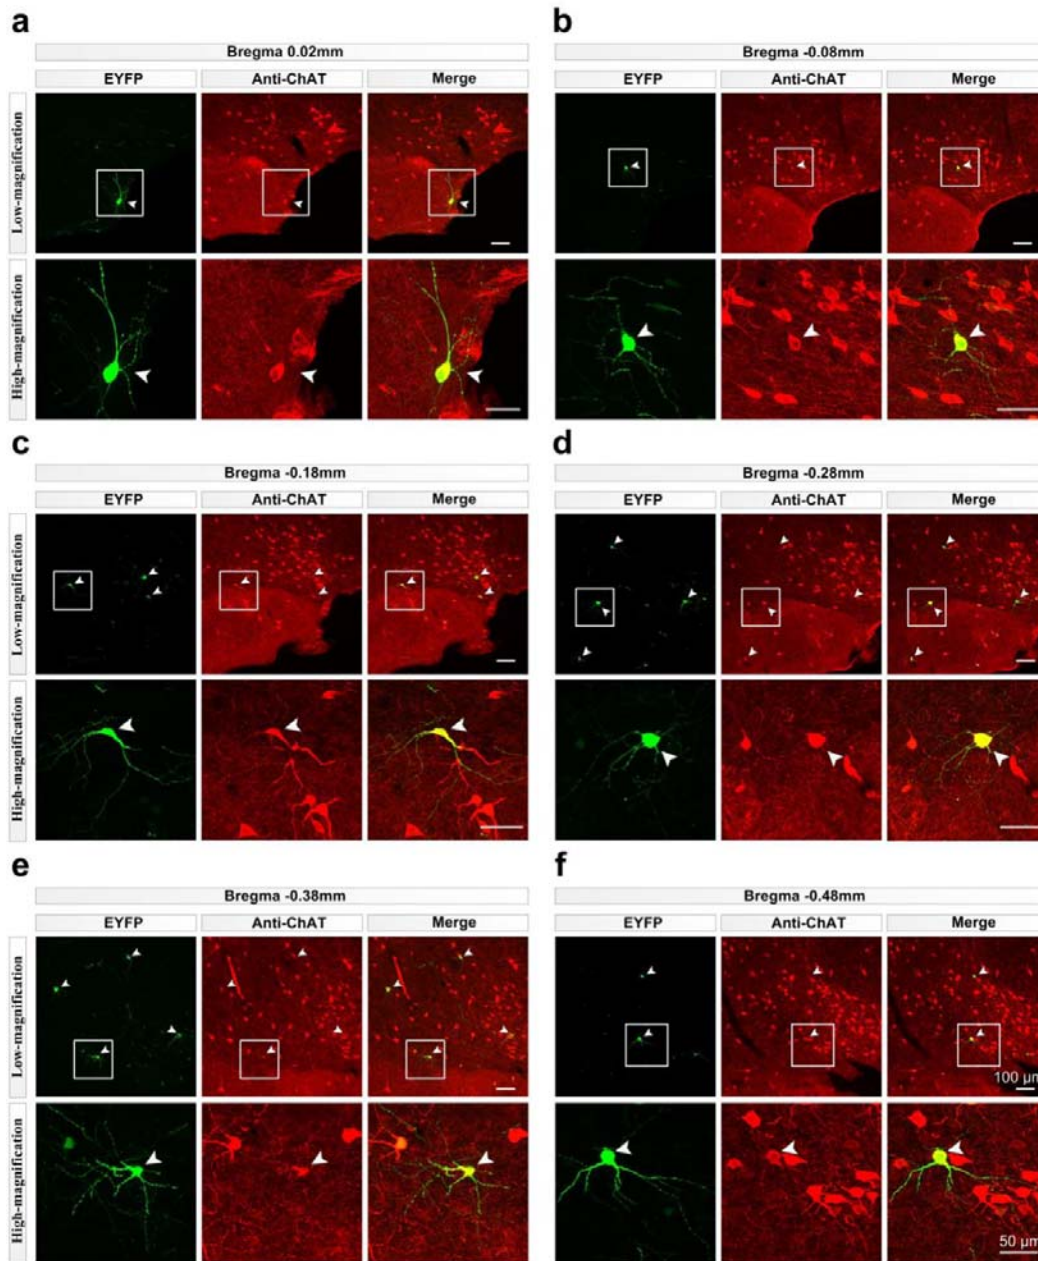

1358

1359

1360



1361 **Supplementary Figure 12** (continued):

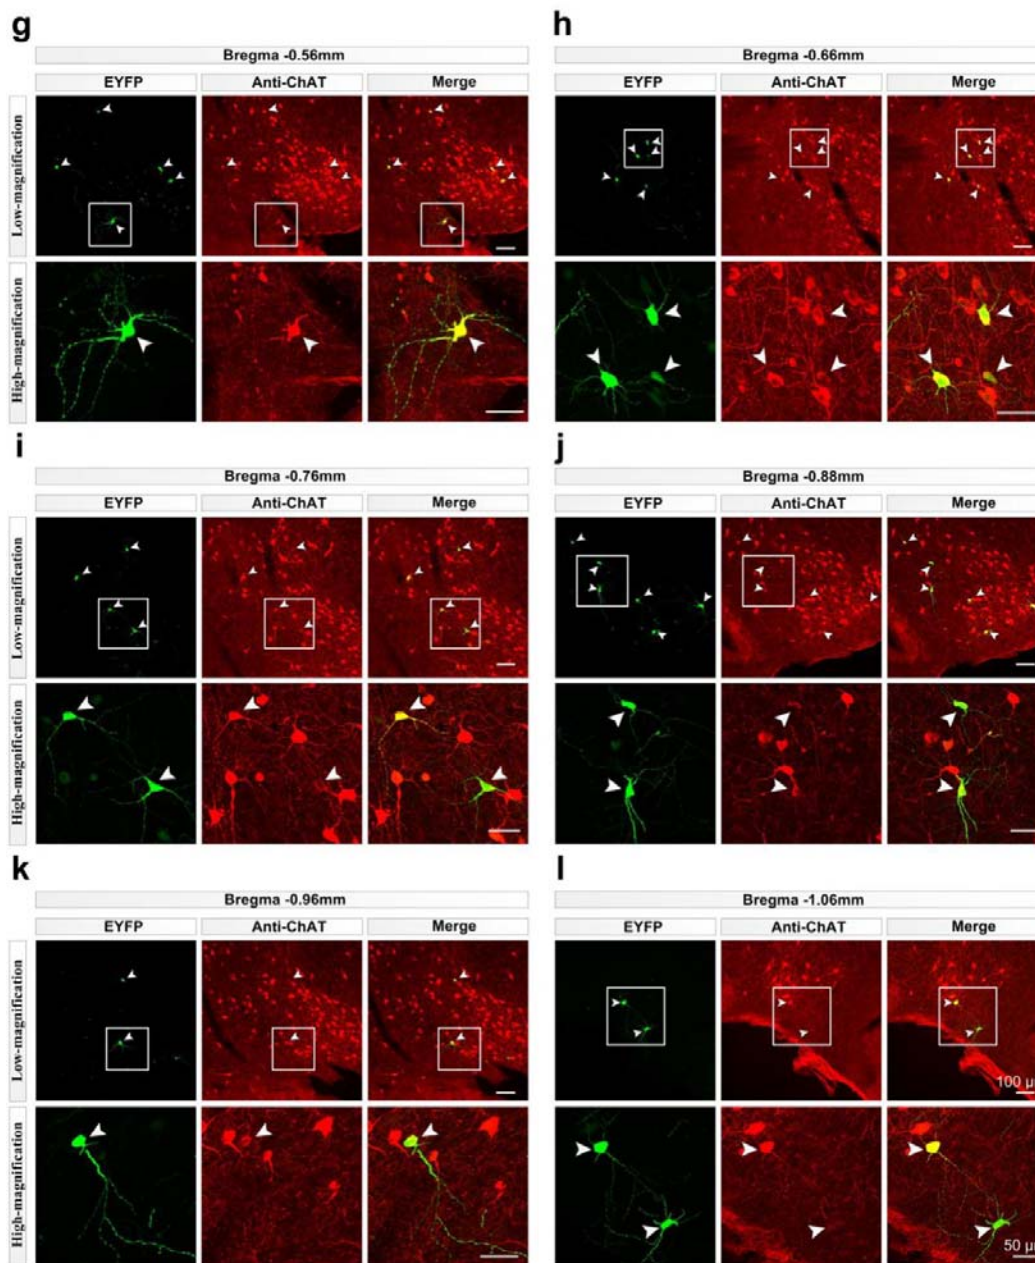

1362

1363 **Supplementary figure 12**

1364 **Cell-type-specific, sparse and super-bright BF cholinergic neuron labeling.**

1365 Twelve 50- $\mu$ m thickness coronal sections ranging from Bregma 0.02 mm to Bregma -  
1366 1.06 mm of the injection site were selected from a  $csAAV^{20,000}$ -labeled ChAT-Cre  
1367 transgenic mouse sample and displayed with a 50- $\mu$ m intervals and immunostained  
1368 with anti-ChAT antibody. Upper panels of **a-l** were low-magnification images  
1369 showing overall labeling on each section and lower panels were high-magnification  
1370 images of the corresponding boxes. Colabeled neurons were indicated by white  
1371 arrowheads. This brain sample contained 62 labeled neurons (mouse 4 in

1372 **Supplementary Table 1**) and all of them were ChAT-positive and approximately 39  
1373 neurons were listed here.

1374

1375 **Supplementary Figure 13**

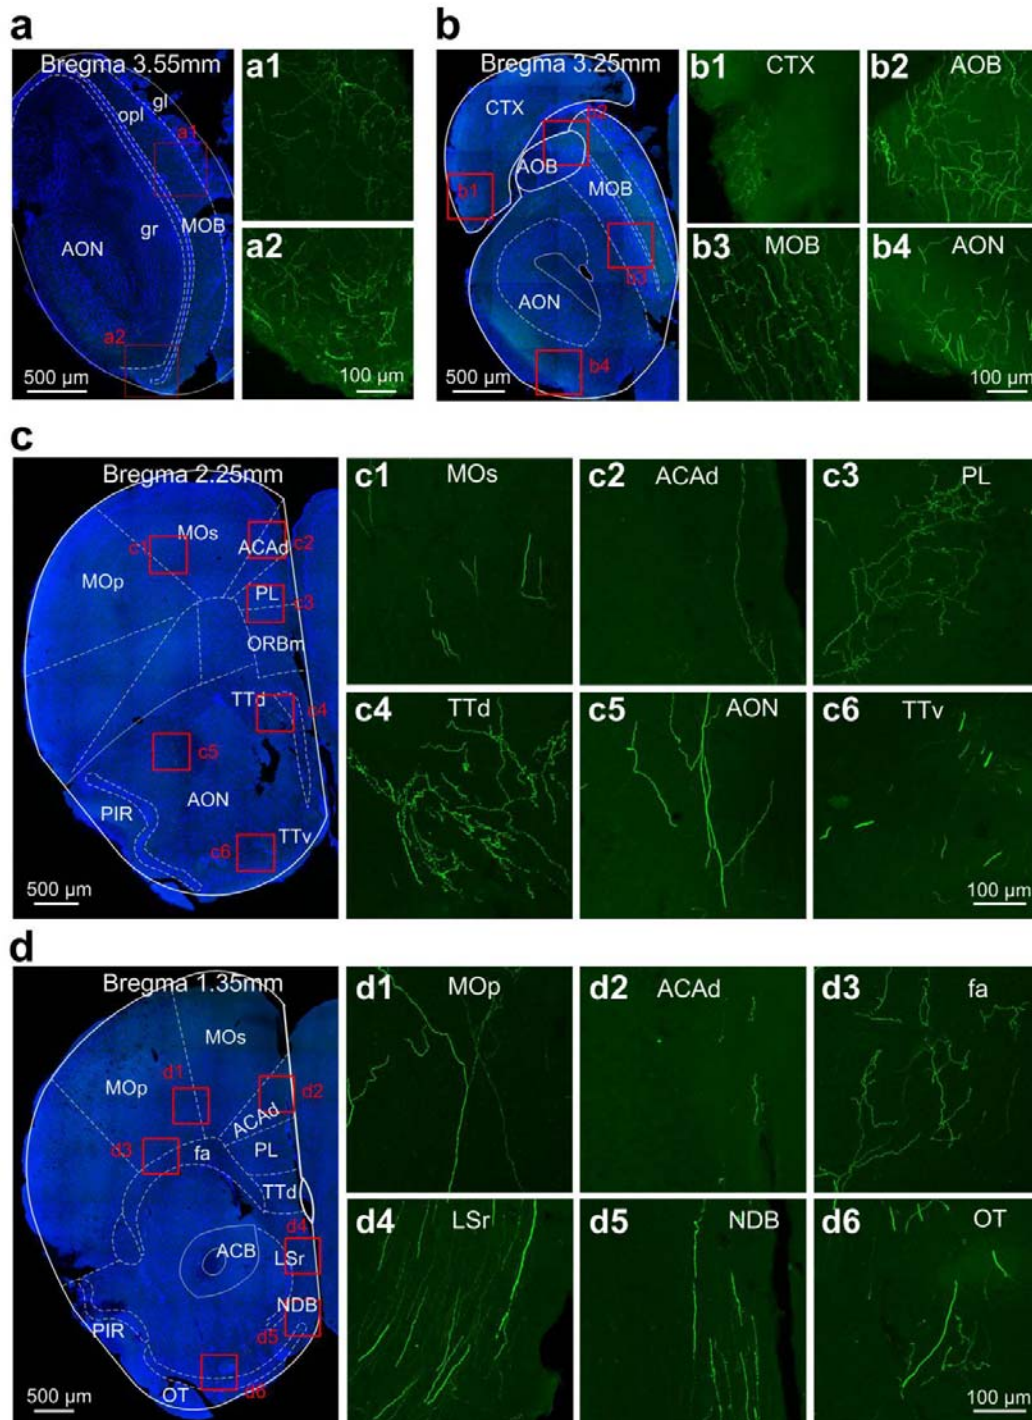

1376

1377



1378 **Supplementary Figure 13** (continued):

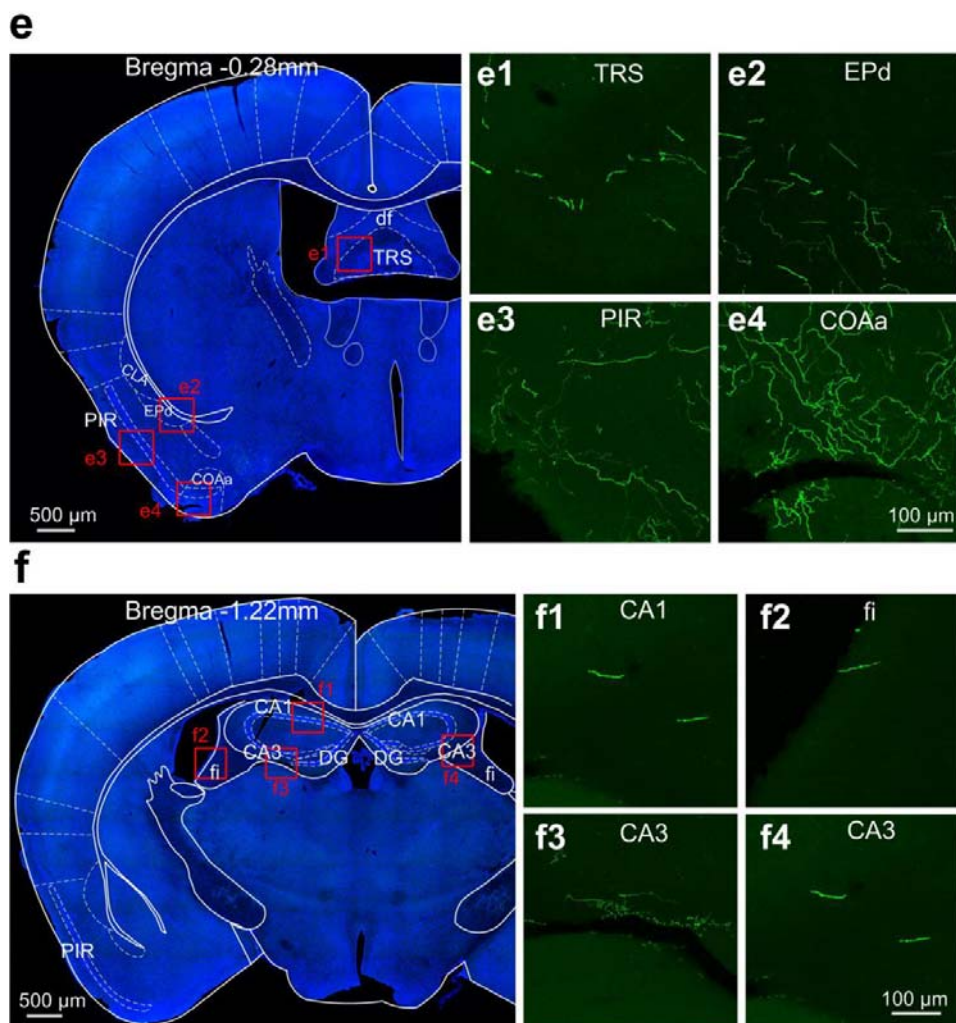

1379

1380 **Supplementary figure 13**

1381 **Brain-wide long-range projections of BF cholinergic neurons.**

1382 Six coronal sections from a representative *csAAV*<sup>20,000</sup>-labeled ChAT-Cre transgenic  
1383 mouse brain sample were selected to show long-range projections of BF cholinergic  
1384 neurons. **a1-a2**, **b1-b4**, **c1-c6**, **d1-d6**, **e1-e4** and **f1-f4** were maximum-intensity  
1385 projections of the respective boxed regions in **a-f** showing the details of the axonal  
1386 projections in different brain regions.

1387 Abbreviations: ACAd, Anterior cingulate area, dorsal part; ACB, nucleus accumbens;  
1388 AOB, accessory olfactory bulb; AON, accessory olfactory nucleus; CA1, field CA1 of  
1389 hippocampus; CA3, field CA3 of hippocampus; CLA, claustrum; COAa, cortical  
1390 amygdalar area, anterior part; CTX, cerebral cortex; df, dorsal fornix; DG, dentate  
1391 gyrus; ENd, endopiriform nucleus, dorsal part; fa, fcorpus callosum, anterior forceps;  
1392 fi, fimbria of the hippocampus; LSr, lateral septal nucleus, rostral (rostroventral) part;

1393 MOB, main olfactory bulb; MOBgl, main olfactory bulb, glomerular layer; MOBgr,  
 1394 main olfactory bulb, granule layer; MOBopl, main olfactory bulb, outer plexiform  
 1395 layer; MOp, primary motor area; MOs, secondary motor area; NDB, diagonal band  
 1396 nucleus; ORBm, orbital area, medial part; OT, olfactory tubercle; PIR, piriform area;  
 1397 PL, Prelimbic area; TRS, triangular nucleus of septum; TTd, taenia tecta, dorsal part;  
 1398 TTV, taenia tecta, ventral part.  
 1399

1400 **Supplementary Figure 14**

| <b>MOp boomerang neurons</b>               |                                            |               |                 |                         |                 |             |             |             |        |
|--------------------------------------------|--------------------------------------------|---------------|-----------------|-------------------------|-----------------|-------------|-------------|-------------|--------|
| Dendritic Morphology                       | Schematic of brain-wide axonal projections |               |                 | Neuronal Classification | Dendrite        |             | Axon        |             |        |
|                                            | Coronal view                               | Sagittal view | Horizontal view |                         | Branches        | Length (mm) | Branches    | Length (mm) |        |
| NO.s1                                      |                                            |               |                 |                         | L5b/<br>IT type | 111         | 7.20        | 693         | 205.5  |
| NO.s2                                      |                                            |               |                 |                         | L5b/<br>IT type | 148         | 8.64        | 2,675       | 199.30 |
| NO.s3                                      |                                            |               |                 |                         | L5b/<br>IT type | 111         | 6.96        | 950         | 245.02 |
| <b>Basal forebrain cholinergic neurons</b> |                                            |               |                 |                         |                 |             |             |             |        |
| Dendritic Morphology                       | Schematic of brain-wide axonal projections |               |                 | Dendrite                |                 | Axon        |             |             |        |
|                                            | Sagittal view                              |               | Horizontal view | Branches                | Length (mm)     | Branches    | Length (mm) |             |        |
| NO.c1                                      |                                            |               |                 | 56                      | 3.88            | 2,659       | 200.86      |             |        |
| NO.c2                                      |                                            |               |                 | 53                      | 3.39            | 9,504       | 490.74      |             |        |
| NO.c3                                      |                                            |               |                 | 56                      | 4.61            | 1,431       | 202.91      |             |        |
| NO.c4                                      |                                            |               |                 | 30                      | 3.51            | 2,642       | 400.58      |             |        |

1401

1402

1403

1404

1405 **Supplementary figure 14**

1406 **Quantitative analysis of MOp boomerang neurons (No. s1-s3) and BF cholinergic**  
1407 **neurons (No. c1-c4).**

1408 For three boomerang neurons, dendrites were depicted in yellow, local axons were in  
1409 magnet, left branches and right branches originated from ipsilateral external capsule  
1410 were in green and red color, respectively for better differentiation. White arrows  
1411 indicate apical dendrites. For four cholinergic neurons, coarse outlines and green dots  
1412 indicated approximate locations of cell body, brain-wide long-range projections were  
1413 demonstrated in sagittal and horizontal views, dendritic morphologies were depicted  
1414 in yellow (No. **c1-c3**) and white (No. **c4**).

1415

1416

1417

1418

1419

1420

1421

1422

1423

1424

1425

1426

1427

1428

1429

1430

1431

1432

1433 **Supplementary Figure 15**

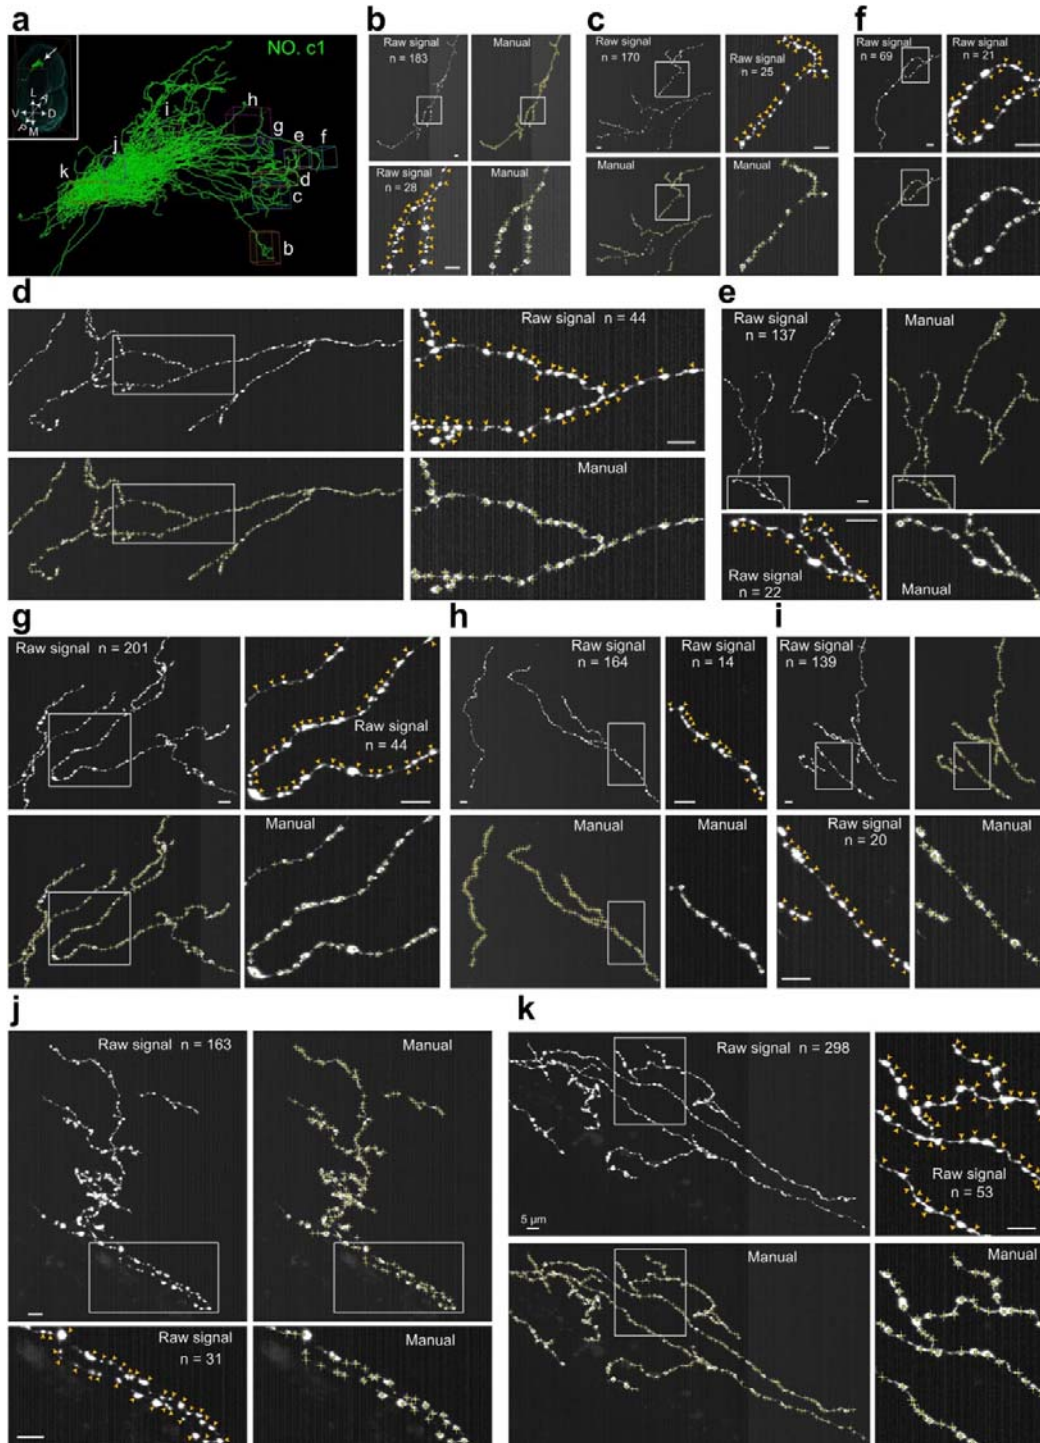

1434

1435

1436

1437

1438 **Supplementary figure 15**

1439 **Schematic of identifying presynaptic axonal boutons with a representative**  
1440 **cholinergic neuron (No. c1).**

1441 **(a)** Overview of ten regions of interest (ROIs, **b-k**) randomly selected from No. **c1** for  
1442 bouton identification.

1443 **(b-k)** Demonstration of raw signals (indicated by yellow arrowheads) and manual  
1444 identification of boutons with ImageJ (indicated by yellow crosses) of ten ROIs in **a**.

1445

1446

1447

1448

1449

1450

1451

1452

1453

1454

1455

1456

1457

1458

1459

1460

1461

1462

1463

1464

1465



1466 **Supplementary Table 1. Quantifications of starter cells and total input cells of**  
1467 **IAAV-DIO-GT/RG and sAAV-DIO-GT/RG labeling groups.**

| Total number of starter cells                      |         |         |         |         |         |                     |
|----------------------------------------------------|---------|---------|---------|---------|---------|---------------------|
|                                                    | Mouse 1 | Mouse 2 | Mouse 3 | Mouse 4 | Mouse 5 | Mean $\pm$ sem      |
| IAAV-DIO-GT/RG                                     | 2,999   | 2,308   | 2,396   | 1,940   | 2,286   | 2,386 $\pm$ 172     |
| sAAV-DIO-GT/RG                                     | 1,842   | 2,406   | 2,155   | 1,974   | 1,817   | 2,039 $\pm$ 127     |
| Total number of input cells across the whole brain |         |         |         |         |         |                     |
| IAAV-DIO-GT/RG                                     | 150,915 | 132,027 | 113,278 | 115,100 | 105,647 | 123,393 $\pm$ 9,076 |
| sAAV-DIO-GT/RG                                     | 81,771  | 70,309  | 72,182  | 43,507  | 54,665  | 64,487 $\pm$ 7,617  |

1468

1469

1470

1471

1472

1473

1474

1475

1476

1477

1478

1479

1480

1481

1482

1483

1484

1485 **Supplementary Table 2. Abbreviations of anatomical structures according to the**  
 1486 **Allen Brain Atlas (ABA, <http://mouse.brain-map.org/>).**

| Abbreviations | Definitions                                       | Abbreviations | Definitions                                       |
|---------------|---------------------------------------------------|---------------|---------------------------------------------------|
| AAA           | Anterior amygdalar area                           | MOBgl         | Main olfactory bulb, glomerular layer             |
| ac            | Anterior commissure                               | MOBgr         | Main olfactory bulb, granule layer                |
| ACAd          | Anterior cingulate area, dorsal part              | MOBopl        | Main olfactory bulb, outer plexiform layer        |
| ACB           | Nucleus accumbens                                 | MOp           | Primary motor area                                |
| AI            | Agranular insular area                            | MOs           | Secondary motor area                              |
| Alp           | Agranular insular area, posterior part            | MRN           | Midbrain reticular nucleus                        |
| APN           | Anterior pretectal nucleus                        | MY            | Medulla                                           |
| AOB           | Accessory olfactory bulb                          | MY-mot        | Medulla, motor related                            |
| AON           | Anterior olfactory nucleus                        | MY-sen        | Medulla, sensory related                          |
| AUD           | Auditory areas                                    | NDB           | Diagonal band nucleus                             |
| BLA           | Basolateral amygdalar nucleus                     | OB            | Olfactory bulb                                    |
| BMA           | Basomedial amygdalar nucleus                      | ORB           | Orbital area                                      |
| BST           | Bed nuclei of the stria terminalis                | ORBm          | Orbital area, medial part                         |
| CA1           | Field CA1 of hippocampus                          | OT            | Olfactory tubercle                                |
| CA3           | Field CA3 of hippocampus                          | P             | Pons                                              |
| CB            | Cerebellum                                        | PAG           | Periaqueductal gray                               |
| CBX           | Cerebellar cortex                                 | PAL           | Pallidum                                          |
| cc            | Corpus callosum                                   | PARN          | Parvicellular reticular nucleus                   |
| CEA           | Central amygdalar nucleus                         | PB            | Parabrachial nucleus                              |
| CEAc          | Central amygdalar nucleus, capsular part          | PCN           | Paracentral nucleus                               |
| CEAI          | Central amygdalar nucleus, lateral part           | PERI          | Perirhinal area                                   |
| CEAm          | Central amygdalar nucleus, medial part            | PF            | Parafascicular nucleus                            |
| CL            | Central lateral nucleus of the thalamus           | PG            | Pontine gray                                      |
| CLA           | Clastrum                                          | PIR           | Piriform area                                     |
| CP            | Caudoputamen                                      | PL            | Prelimbic area                                    |
| cpd           | Cerebral peduncle                                 | P-mot         | Pons, motor related                               |
| COAa          | Cortical amygdalar area, anterior part            | PO            | Posterior complex of the thalamus                 |
| CTXpl         | Cortical plate                                    | PPN           | Pedunculopontine nucleus                          |
| CTXsp         | Cortical subplate                                 | PRNc          | Pontine reticular nucleus, caudal part            |
| CUN           | Cuneiform nucleus                                 | PRNr          | Pontine reticular nucleus                         |
| df            | Dorsal fornix                                     | PRT           | Pretectal region                                  |
| dhc           | Dorsal hippocampal commissure                     | P-sen         | Pons, sensory related                             |
| DG            | Dentate gyrus                                     | py            | Pyramid                                           |
| DN            | Dentate nucleus                                   | RN            | Red nucleus                                       |
| DR            | Dorsal nucleus raphe                              | RR            | Midbrain reticular nucleus, retrorubral area      |
| ec            | External capsule                                  | RSP           | Retrosplenial area                                |
| ECT           | Ectorhinal area                                   | RT            | Reticular nucleus of the thalamus                 |
| ENTm          | Entorhinal area, medial part, dorsal zone         | SC            | Superior colliculus                               |
| EPd           | Endopiriform nucleus, dorsal part                 | SCm           | Superior colliculus, motor related                |
| EPv           | Endopiriform nucleus, ventral part                | SCs           | Superior colliculus, sensory related              |
| fa            | Corpus callosum, anterior forceps                 | SI            | Substantia innominata                             |
| fi            | Fimbria                                           | SNC           | Substantia nigra, compact part                    |
| FN            | Fastigial nucleus                                 | SNr           | Substantia nigra, reticular part                  |
| FRP           | Frontal pole, cerebral cortex                     | SPF           | Subparafascicular nucleus                         |
| FS            | Fundus of striatum                                | SPVI          | Spinal nucleus of the trigeminal, interpolar part |
| GP            | Globus pallidus                                   | SS            | Somatosensory areas                               |
| GRN           | Gigantocellular reticular nucleus                 | SSp           | Primary somatosensory area                        |
| GU            | Gustatory areas                                   | SSs           | Supplemental somatosensory area                   |
| HIP           | Hippocampal region                                | STN           | Subthalamic nucleus                               |
| HPF           | Hippocampal formation                             | STR           | Striatum                                          |
| HY            | Hypothalamus                                      | SUB           | Subiculum                                         |
| IC            | Inferior colliculus                               | TEa           | Temporal association areas                        |
| ILM           | Intralaminar nuclei of the dorsal thalamus        | TH            | Thalamus                                          |
| int           | Internal capsule                                  | TRS           | Triangular nucleus of septum                      |
| IP            | Interposed nucleus                                | TTd           | Taenia tecta, dorsal part                         |
| IPN           | Interpeduncular nucleus                           | TTv           | Taenia tecta, ventral part                        |
| IRN           | Intermediate reticular nucleus                    | VAL           | Ventral anterior-lateral complex of the thalamus  |
| LAT           | Lateral group of the dorsal thalamus              | VISal/l       | Anterolateral/lateral visual area                 |
| LHA           | Lateral hypothalamic area                         | VISC          | Visceral area                                     |
| LSc           | Lateral septal nucleus, caudal (caudodorsal) part | VM            | Ventral medial nucleus of the thalamus            |
| MBmot         | Midbrain, motor related                           | VNC           | Vestibular nuclei                                 |
| MBsta         | Midbrain, behavioral state related                | VP            | Ventral posterior complex of the thalamus         |
| MD            | Mediodorsal nucleus of thalamus                   | VPL           | Ventral posterolateral nucleus of the thalamus    |
| MED           | Medial group of the dorsal thalamus               | VPM           | Ventral posteromedial nucleus of the thalamus     |
| ml            | Medial lemniscus                                  | VTA           | Ventral tegmental area                            |
| MO            | Somatomotor areas                                 | ZI            | Zona incerta                                      |

1487

1488

1489

1490 **Supplementary Table 3. The total numbers of labeled neurons across the whole**  
 1491 **brain after labeling with the indicated IAAVs , sAAVs and csIAAVs in different**  
 1492 **regions.**

| <b>Non-cell-type-specific labeling with IAAVs (wild-type mice)</b>           |                          |                                    |                                    |         |         |         |                |
|------------------------------------------------------------------------------|--------------------------|------------------------------------|------------------------------------|---------|---------|---------|----------------|
| Injection site                                                               |                          | Coordinates                        | Cell number across the whole brain |         |         |         |                |
|                                                                              |                          |                                    | Mouse 1                            | Mouse 2 | Mouse 3 | Mouse 4 | Mean $\pm$ sem |
| MOp                                                                          | IAAV <sup>20,000</sup>   | AP= 1.54<br>ML= -1.60<br>DV= -1.60 | 652                                | 916     | 688     | 329     | 646 $\pm$ 121  |
|                                                                              | IAAV <sup>200,000</sup>  |                                    | 74                                 | 68      | 58      | 77      | 69 $\pm$ 4     |
|                                                                              | sAAV <sup>20,000</sup>   |                                    | 100                                | 182     | 260     | 236     | 195 $\pm$ 35   |
|                                                                              | sAAV <sup>40,000</sup>   |                                    | 103                                | 183     | 151     | 114     | 138 $\pm$ 18   |
|                                                                              | sAAV <sup>80,000</sup>   |                                    | 66                                 | 36      | 16      | 59      | 44 $\pm$ 11    |
| IAAV <sup>200,000</sup>                                                      |                          |                                    |                                    |         |         |         |                |
| CA3                                                                          |                          | AP= -1.7; ML= -2.0;<br>DV= -2.0    | 49                                 | 75      | 59      |         | 61 $\pm$ 8     |
| CA1                                                                          |                          | AP= -1.7; ML= -2.0;<br>DV= -1.5    | 150                                | 98      | 137     |         | 128 $\pm$ 16   |
| <b>Cell-type-specific labeling with csIAAVs (Cre-driver transgenic mice)</b> |                          |                                    |                                    |         |         |         |                |
| Mop                                                                          | csIAAV <sup>20,000</sup> | AP= 1.54<br>ML= -1.6<br>DV= -1.6   | 497                                | 573     | 580     |         | 550 $\pm$ 27   |
| Basal forebrain                                                              | csIAAV <sup>20,000</sup> | AP= 0.21<br>ML= -1.5<br>DV= -5.5   | 46                                 | 58      | 48      | 62      | 54 $\pm$ 4     |
| VTA                                                                          | csIAAV <sup>8,000</sup>  | AP= -3.4<br>ML= -0.3<br>DV= -4.1   | 116                                | 137     | 159     | 214     | 157 $\pm$ 21   |

1493

1494

1495

1496

1497

1498

1499

1500

1501 **Supplementary Table 4. Quantifications of presynaptic axonal boutons of four**  
 1502 **cholinergic neurons (No. c1-c4).**

|                                    | No.c1                 |                    |               | No.c2                  |                    |               | No.c3                 |                    |               | No.c4                  |                    |               |
|------------------------------------|-----------------------|--------------------|---------------|------------------------|--------------------|---------------|-----------------------|--------------------|---------------|------------------------|--------------------|---------------|
|                                    | Number of boutons     | Axonal length (µm) | density /µm   | Number of boutons      | Axonal length (µm) | density /µm   | Number of boutons     | Axonal length (µm) | density /µm   | Number of boutons      | Axonal length (µm) | density /µm   |
| ROI-1                              | 183                   | 539.7119           | 0.3391        | 59                     | 217.998            | 0.2706        | 43                    | 154.5866           | 0.2782        | 45                     | 142.4557           | 0.3159        |
| ROI-2                              | 170                   | 652.3893           | 0.2606        | 45                     | 146.8952           | 0.3068        | 112                   | 336.6172           | 0.3327        | 41                     | 108.3174           | 0.3785        |
| ROI-3                              | 209                   | 615.2699           | 0.3397        | 43                     | 156.8266           | 0.2742        | 41                    | 178.8266           | 0.2293        | 113                    | 383.7817           | 0.2944        |
| ROI-4                              | 298                   | 919.7885           | 0.324         | 38                     | 125.9487           | 0.3017        | 58                    | 210.1786           | 0.276         | 46                     | 197.7769           | 0.2326        |
| ROI-5                              | 69                    | 177.9003           | 0.3879        | 39                     | 160.4843           | 0.243         | 41                    | 142.1778           | 0.2884        | 52                     | 189.0938           | 0.275         |
| ROI-6                              | 137                   | 407.4272           | 0.3363        | 33                     | 96.53236           | 0.3419        | 69                    | 233.0409           | 0.2961        | 57                     | 169.729            | 0.3358        |
| ROI-7                              | 201                   | 568.9249           | 0.3533        | 59                     | 192.9515           | 0.3058        | 46                    | 172.0581           | 0.2674        | 64                     | 240.632            | 0.266         |
| ROI-8                              | 163                   | 772.5238           | 0.211         | 69                     | 151.3374           | 0.4559        | 62                    | 248.3191           | 0.2497        | 43                     | 130.3187           | 0.33          |
| ROI-9                              | 164                   | 490.4556           | 0.3344        | 48                     | 176.4415           | 0.272         | 73                    | 298.1006           | 0.2449        | 146                    | 386.982            | 0.3773        |
| ROI-10                             | 139                   | 441.6116           | 0.3148        | 36                     | 147.8423           | 0.2435        | 56                    | 171.7005           | 0.3261        | 34                     | 106.6103           | 0.3189        |
| <b>Mean</b>                        | <b>173.3</b>          | <b>558.6003</b>    | <b>0.3201</b> | <b>46.9</b>            | <b>157.305786</b>  | <b>0.3015</b> | <b>60.1</b>           | <b>214.5606</b>    | <b>0.2789</b> | <b>64.1</b>            | <b>205.56975</b>   | <b>0.3124</b> |
| <b>SEM</b>                         | <b>18.637507</b>      | <b>64.5331285</b>  | <b>0.0158</b> | <b>3.7340773</b>       | <b>10.6693277</b>  | <b>0.0197</b> | <b>6.8190094</b>      | <b>20.31245507</b> | <b>0.0106</b> | <b>11.485692</b>       | <b>32.7300585</b>  | <b>0.0148</b> |
| <b>Estimated number of boutons</b> | <b>64,295 ± 3,174</b> |                    |               | <b>147,958 ± 9,668</b> |                    |               | <b>56,592 ± 2,151</b> |                    |               | <b>125,138 ± 5,928</b> |                    |               |

1503

1504

1505

1506 **Supplementary Table 5. Summary of viruses used in this study.**

| <b>Part I----rAAVs</b>                                  |                                          |                                                                                                                                                               |                             |                                                                                                                                                                                                                                                                           |
|---------------------------------------------------------|------------------------------------------|---------------------------------------------------------------------------------------------------------------------------------------------------------------|-----------------------------|---------------------------------------------------------------------------------------------------------------------------------------------------------------------------------------------------------------------------------------------------------------------------|
|                                                         |                                          | Plasmids ( $\mu\text{g}/\mu\text{l}$ )                                                                                                                        | Titres<br>(viral genome/ml) | Notes                                                                                                                                                                                                                                                                     |
| <b>Verification of viral interactions</b>               |                                          |                                                                                                                                                               |                             |                                                                                                                                                                                                                                                                           |
| IAAV-EYFP/mCherry                                       |                                          | A. pAAV-EF1 $\alpha$ -EYFP (1.0 $\mu\text{g}/\mu\text{l}$ )<br><br>B. pAAV-EF1 $\alpha$ -mCherry (0.7 $\mu\text{g}/\mu\text{l}$ )                             | $5.0 \times 10^{12}$        | Plasmids A and B were pre-mixed at a ratio of 1:1                                                                                                                                                                                                                         |
| sAAV-EYFP/mCherry                                       | rAAV2/9-EF1 $\alpha$ -EYFP               |                                                                                                                                                               | $5.0 \times 10^{12}$        | rAAV2/9-EF1 $\alpha$ -EYFP and rAAV2/9-EF1 $\alpha$ -mCherry were post-mixed at a ratio of 1:1, generating sAAV-EYFP/mCherry                                                                                                                                              |
|                                                         | rAAV2/9-EF1 $\alpha$ -mCherry            |                                                                                                                                                               | $5.0 \times 10^{12}$        |                                                                                                                                                                                                                                                                           |
| <b>Non-cell type specific labelling systems (IAAVs)</b> |                                          |                                                                                                                                                               |                             |                                                                                                                                                                                                                                                                           |
| IAAVs                                                   | IAAV <sup>20,000</sup>                   | A. pAAV-CMV-Cre (1.2 $\mu\text{g}/\mu\text{l}$ );<br><br>B. pAAV-EF1 $\alpha$ -double floxed-EYFP-WPRE-HGHpA (Addgene #20296; 1.0 $\mu\text{g}/\mu\text{l}$ ) | $4.0 \times 10^{12}$        | Plasmids A and B were pre-mixed at a ratio of 1:20,000, 1:200,000 and 1:1,000,000, generating IAAV <sup>20,000</sup> , IAAV <sup>200,000</sup> and IAAV <sup>1,000,000</sup> , respectively                                                                               |
|                                                         | IAAV <sup>200,000</sup>                  |                                                                                                                                                               | $7.0 \times 10^{12}$        |                                                                                                                                                                                                                                                                           |
|                                                         | IAAV <sup>1,000,000</sup>                |                                                                                                                                                               | $2.9 \times 10^{12}$        |                                                                                                                                                                                                                                                                           |
| sAAVs                                                   | rAAV2/9-CMV-Cre                          | B. pAAV-EF1 $\alpha$ -double floxed-EYFP-WPRE-HGHpA (Addgene #20296; 1.0 $\mu\text{g}/\mu\text{l}$ )                                                          | $4.0 \times 10^{12}$        | rAAV2/9-CMV-Cre and rAAV2/9-EF1 $\alpha$ -double floxed-EYFP were post-mixed at a ratio of 1:20,000, 1:40,000, 1:80,000 and 1:1,000,000, generating sAAV <sup>20,000</sup> , sAAV <sup>40,000</sup> , sAAV <sup>80,000</sup> and sAAV <sup>1,000,000</sup> , respectively |
|                                                         | rAAV2/9-EF1 $\alpha$ -double floxed-EYFP |                                                                                                                                                               | $1.0 \times 10^{13}$        |                                                                                                                                                                                                                                                                           |
| <b>Cell-type-specific labelling systems (csiAAVs)</b>   |                                          |                                                                                                                                                               |                             |                                                                                                                                                                                                                                                                           |
| csiAAVs                                                 | csiAAV <sup>2,000</sup>                  | A. pAAV-EF1 $\alpha$ -Flp (1.0 $\mu\text{g}/\mu\text{l}$ );                                                                                                   | $7.1 \times 10^{12}$        | Plasmids A and B were pre-mixed at a ratio of 1:2,000, 1:8,000 and 1:20,000, generating csiAAV <sup>2,000</sup> , csiAAV <sup>8,000</sup> and csiAAV <sup>20,000</sup> , respectively                                                                                     |
|                                                         | csiAAV <sup>8,000</sup>                  |                                                                                                                                                               | $6.0 \times 10^{12}$        |                                                                                                                                                                                                                                                                           |
|                                                         | csiAAV <sup>20,000</sup>                 |                                                                                                                                                               | $7.0 \times 10^{12}$        |                                                                                                                                                                                                                                                                           |
| cssAAVs                                                 | rAAV2/9-EF1 $\alpha$ -Flp                | B. pAAV-hSyn Con/Fon EYFP (Addgene #55650; 1.0 $\mu\text{g}/\mu\text{l}$ )                                                                                    | $2.0 \times 10^{12}$        | rAAV2/9-EF1 $\alpha$ -Flp and rAAV2/9-hSyn Con/Fon EYFP were post-mixed at a ratio of 1:2,000 and 1:20,000, generating cssAAV <sup>2,000</sup> and cssAAV <sup>20,000</sup> , respectively                                                                                |
|                                                         | rAAV2/9-hSyn Con/Fon EYFP                |                                                                                                                                                               | $5.0 \times 10^{12}$        |                                                                                                                                                                                                                                                                           |
| <b>Monosynaptic tracing systems</b>                     |                                          |                                                                                                                                                               |                             |                                                                                                                                                                                                                                                                           |
| IAAV-DIO-GT/RG                                          |                                          | A. pAAV-EF1 $\alpha$ -DIO-EGFP-TVA (GT) (1.0 $\mu\text{g}/\mu\text{l}$ )<br><br>B. pAAV-EF1 $\alpha$ -DIO-RG (0.5 $\mu\text{g}/\mu\text{l}$ )                 | $7.0 \times 10^{12}$        | Plasmids A and B were pre-mixed at a ratio of 1:2                                                                                                                                                                                                                         |
| sAAV-DIO-GT/RG                                          | rAAV2/9-EF1 $\alpha$ -DIO-EGFP-TVA       |                                                                                                                                                               | $5.6 \times 10^{12}$        | rAAV2/9-EF1 $\alpha$ -DIO-EGFP-TVA and rAAV2/9-EF1 $\alpha$ -DIO-RG were post-mixed at a ratio of 1:2, generating sAAV-DIO-GT/RG                                                                                                                                          |
|                                                         | rAAV2/9-EF1 $\alpha$ -DIO-RG             |                                                                                                                                                               | $6.3 \times 10^{12}$        |                                                                                                                                                                                                                                                                           |
| <b>Part II----RV</b>                                    |                                          |                                                                                                                                                               |                             |                                                                                                                                                                                                                                                                           |
| EnvA-SADAG-DsRed                                        |                                          | Titre: $2.0 \times 10^8$ infectious particles/ml                                                                                                              |                             |                                                                                                                                                                                                                                                                           |

1507

1508
